# Supplementary material for: Integrated proteomic, transcriptomic, and epigenomic profiling identifies SRA1 as a novel therapeutic target for postpartum depression
Source: Research Square preprint supplement (doi:10.21203/rs.3.rs-7125352/v1), 2025-07-23
Supplement: Supplementary file 1 [file 071869a8e0f4b3a2b5de3029.docx]

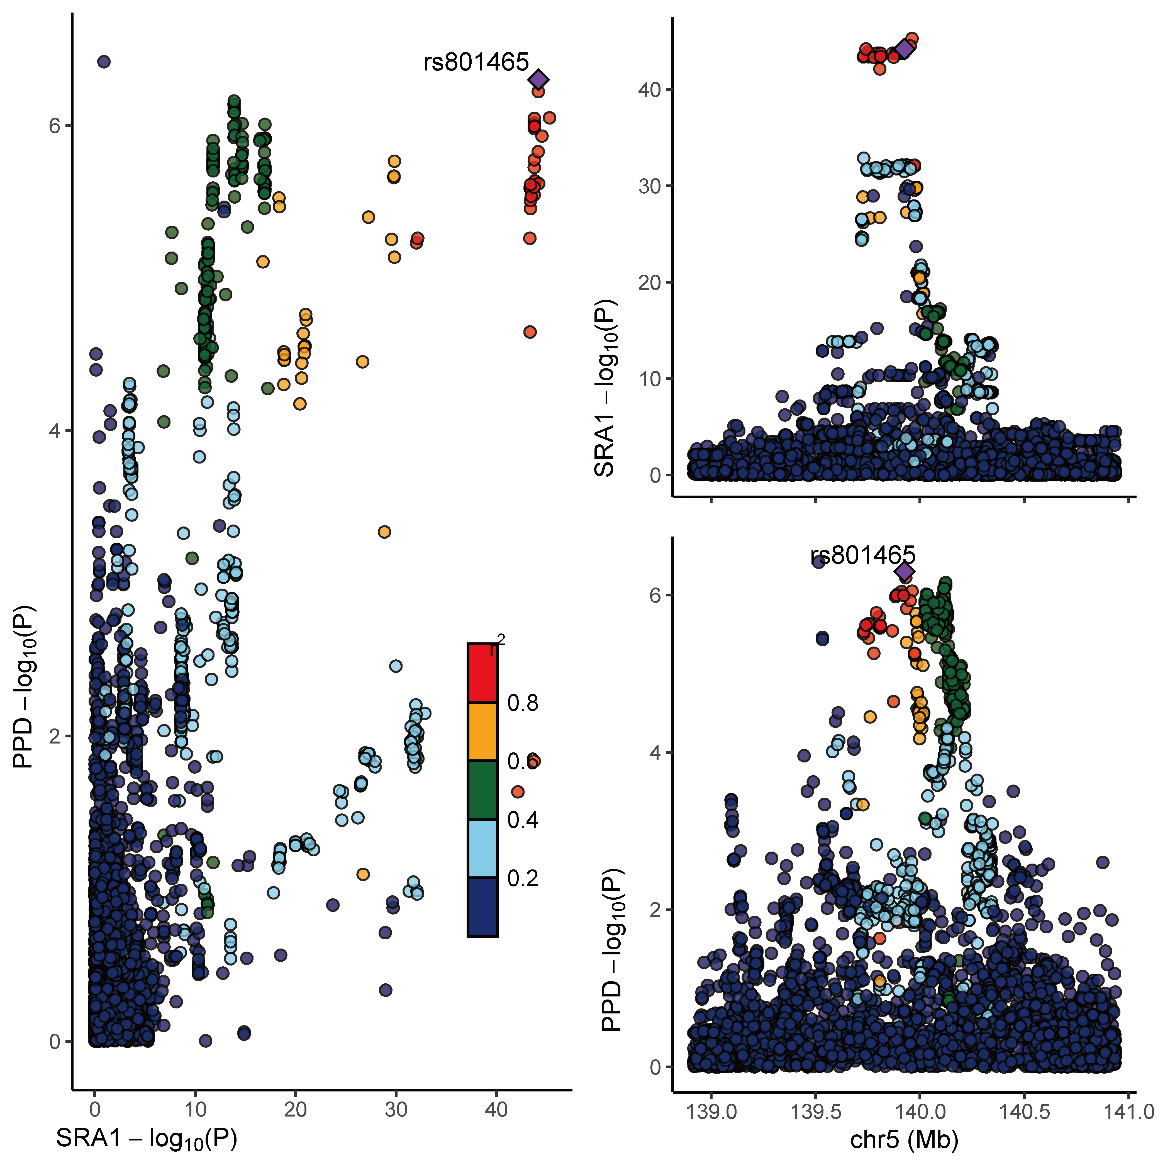


**Supplement Figure 1. Colocalization results of SRA1 from decode and PPD.**


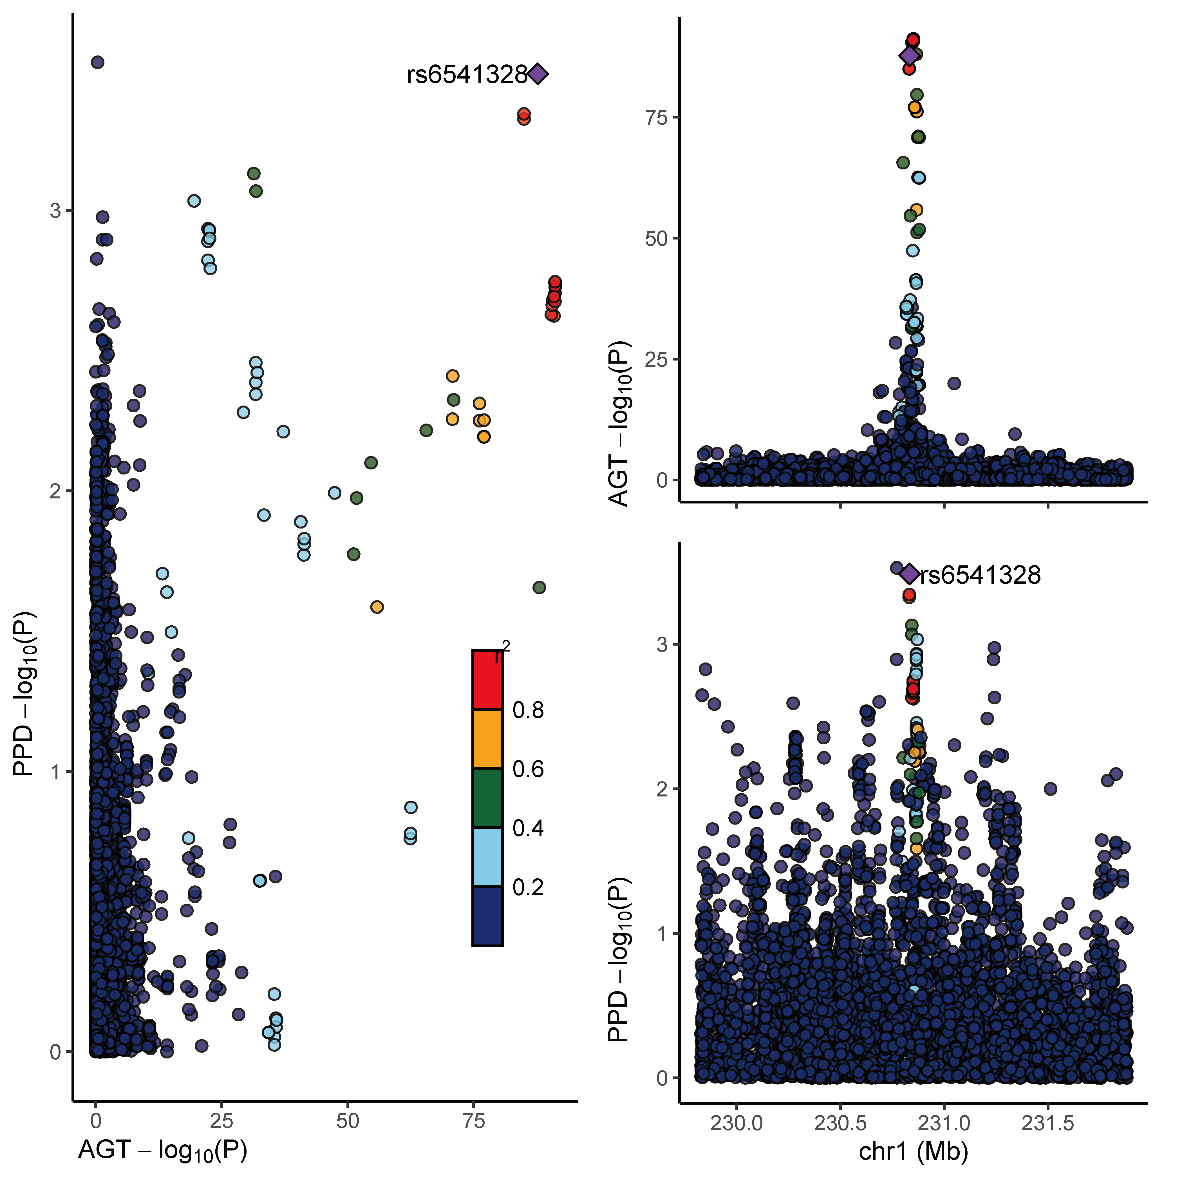


**Supplement Figure 2. Colocalization results of AGT from decode and PPD.**


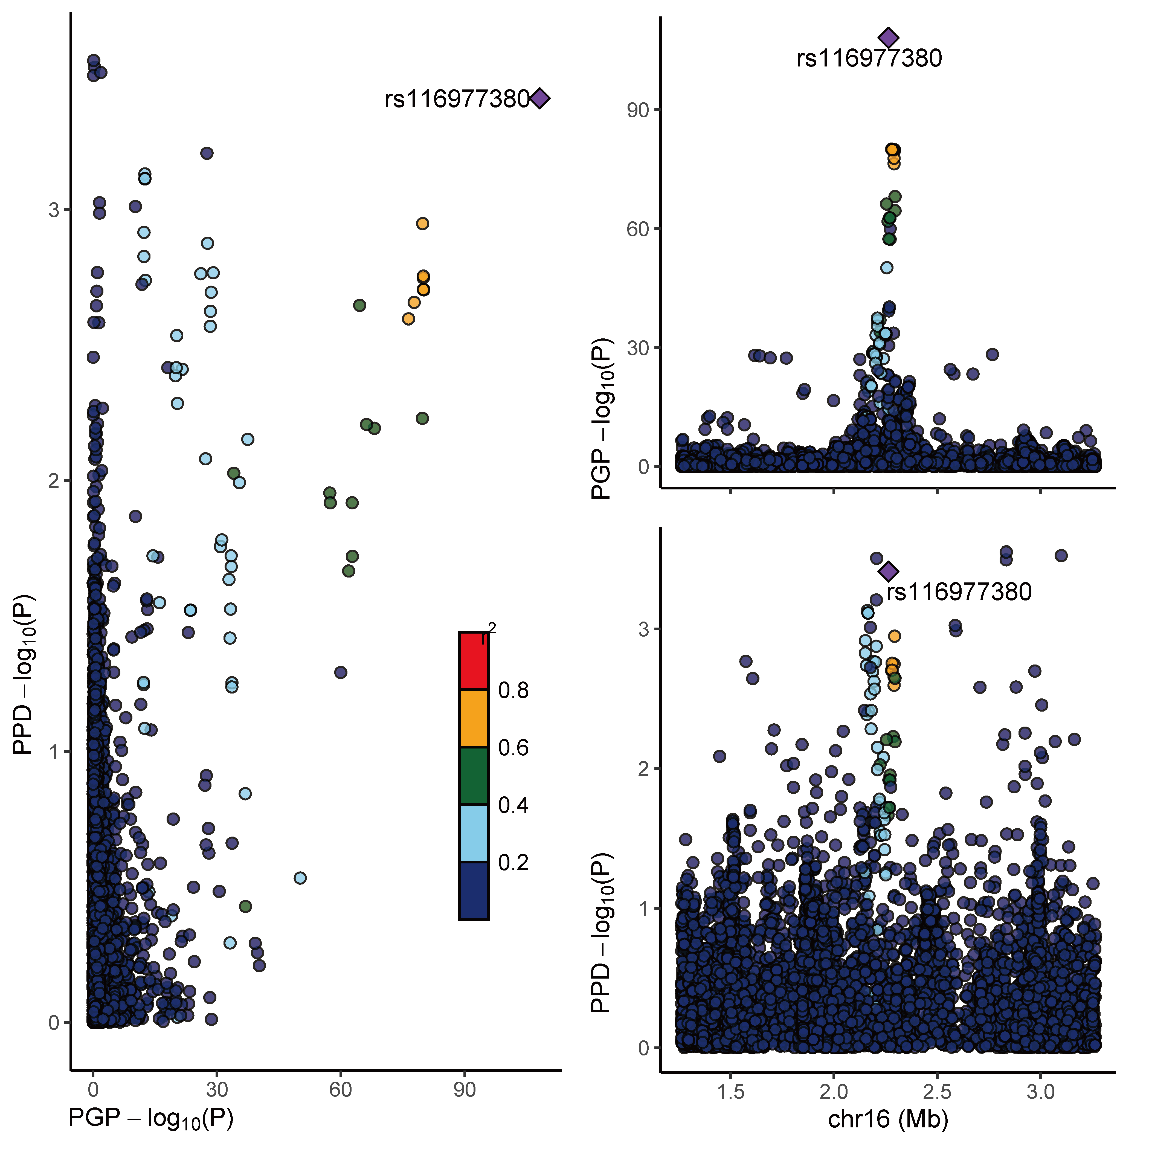


**Supplement Figure 3. Colocalization results of PGP from decode and PPD.**


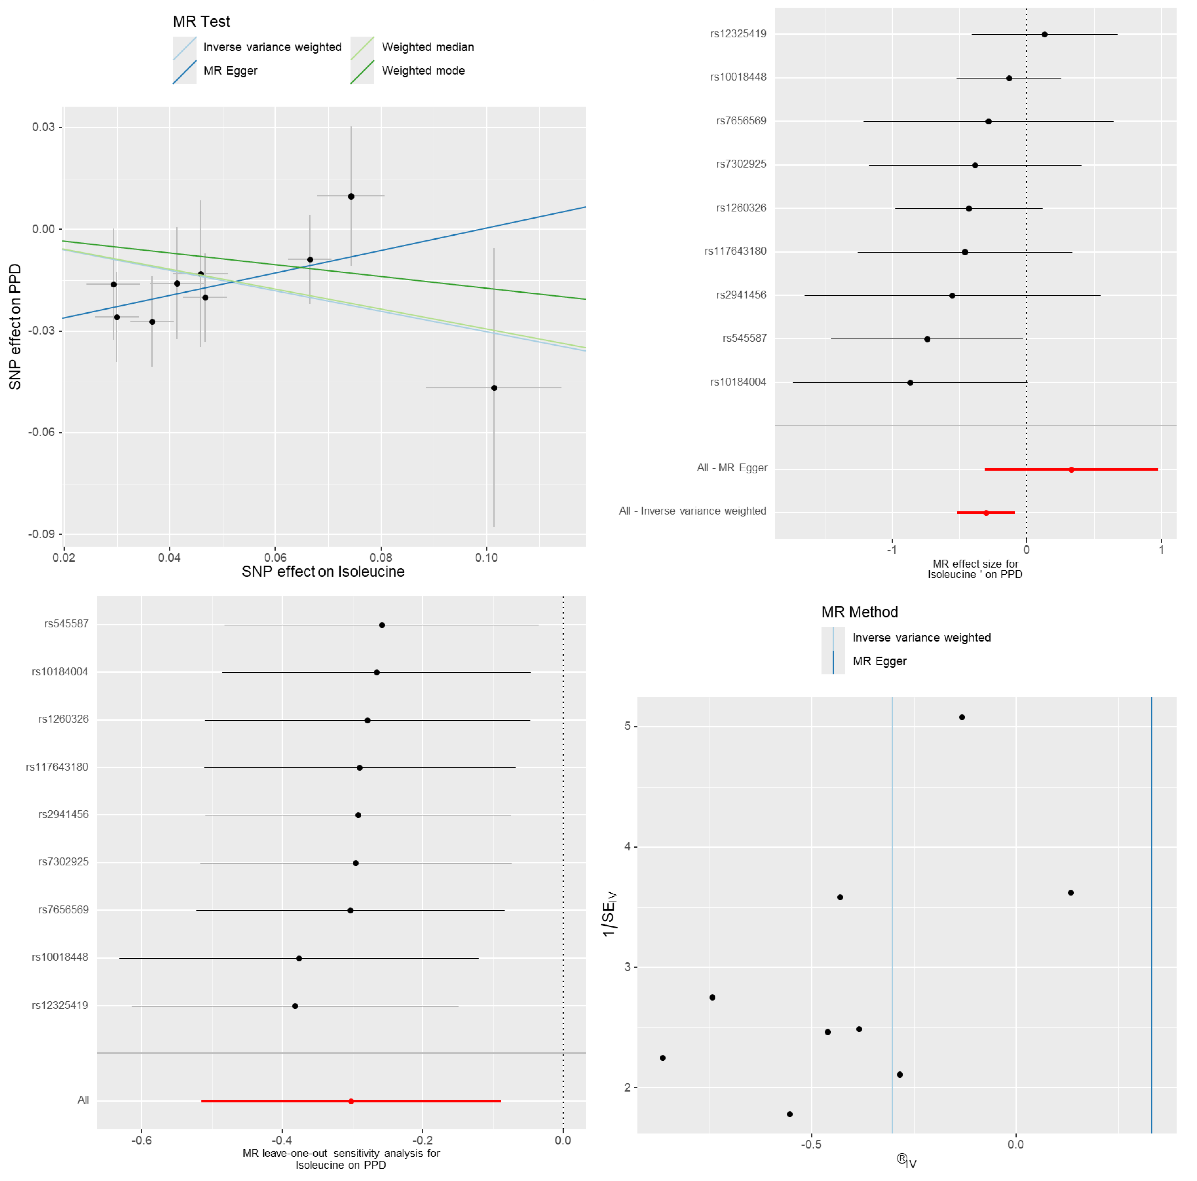


**Supplement Figure 4. Sensitivity MR analysis of the effect of isoleucine on PPD.**

**
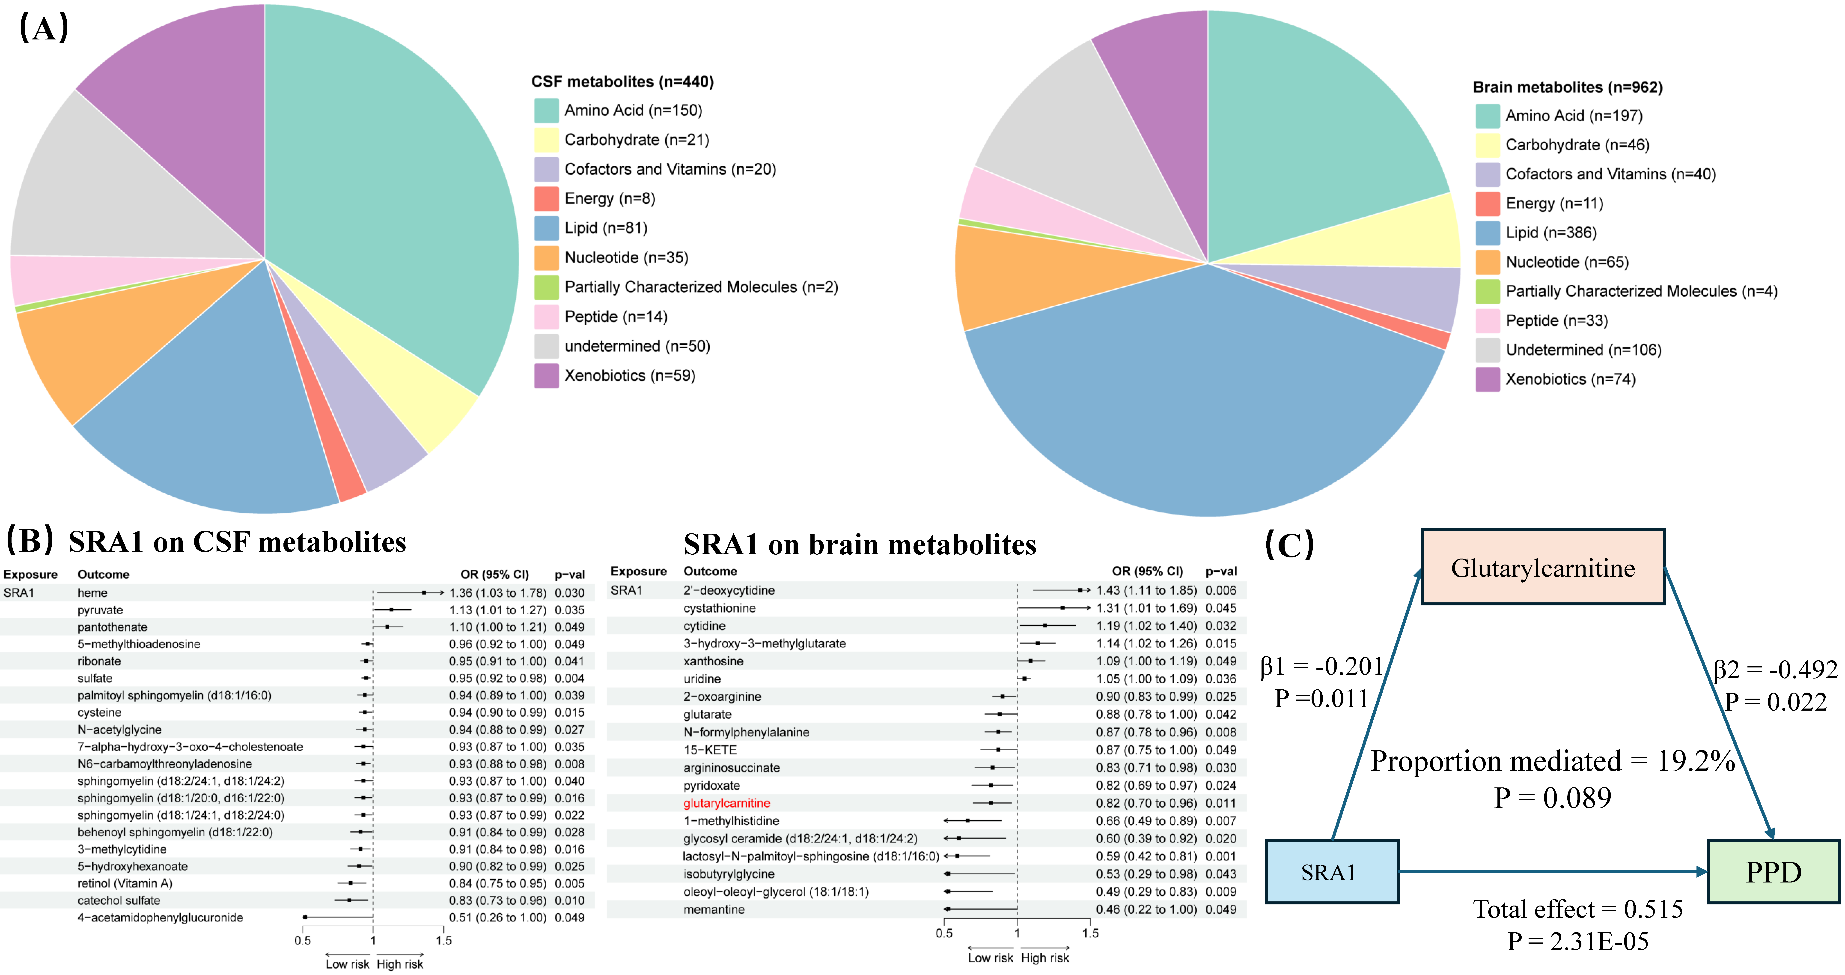
**

**Supplement Figure 5. Mediation MR analysis results of SRA1, CSF and brain metabolites and PPD**

**(A) Classification of CSF and brain metabolites. (B) MR analysis of the effect of significant SRA1 on CSF and brain metabolites. (C)** **Mediation proportion of cross key blood metabolites.**

Abbreviation: CSF: Cerebrospinal fluid; PPD: Postpartum depression; SRA1: Steroid receptor RNA activator 1.


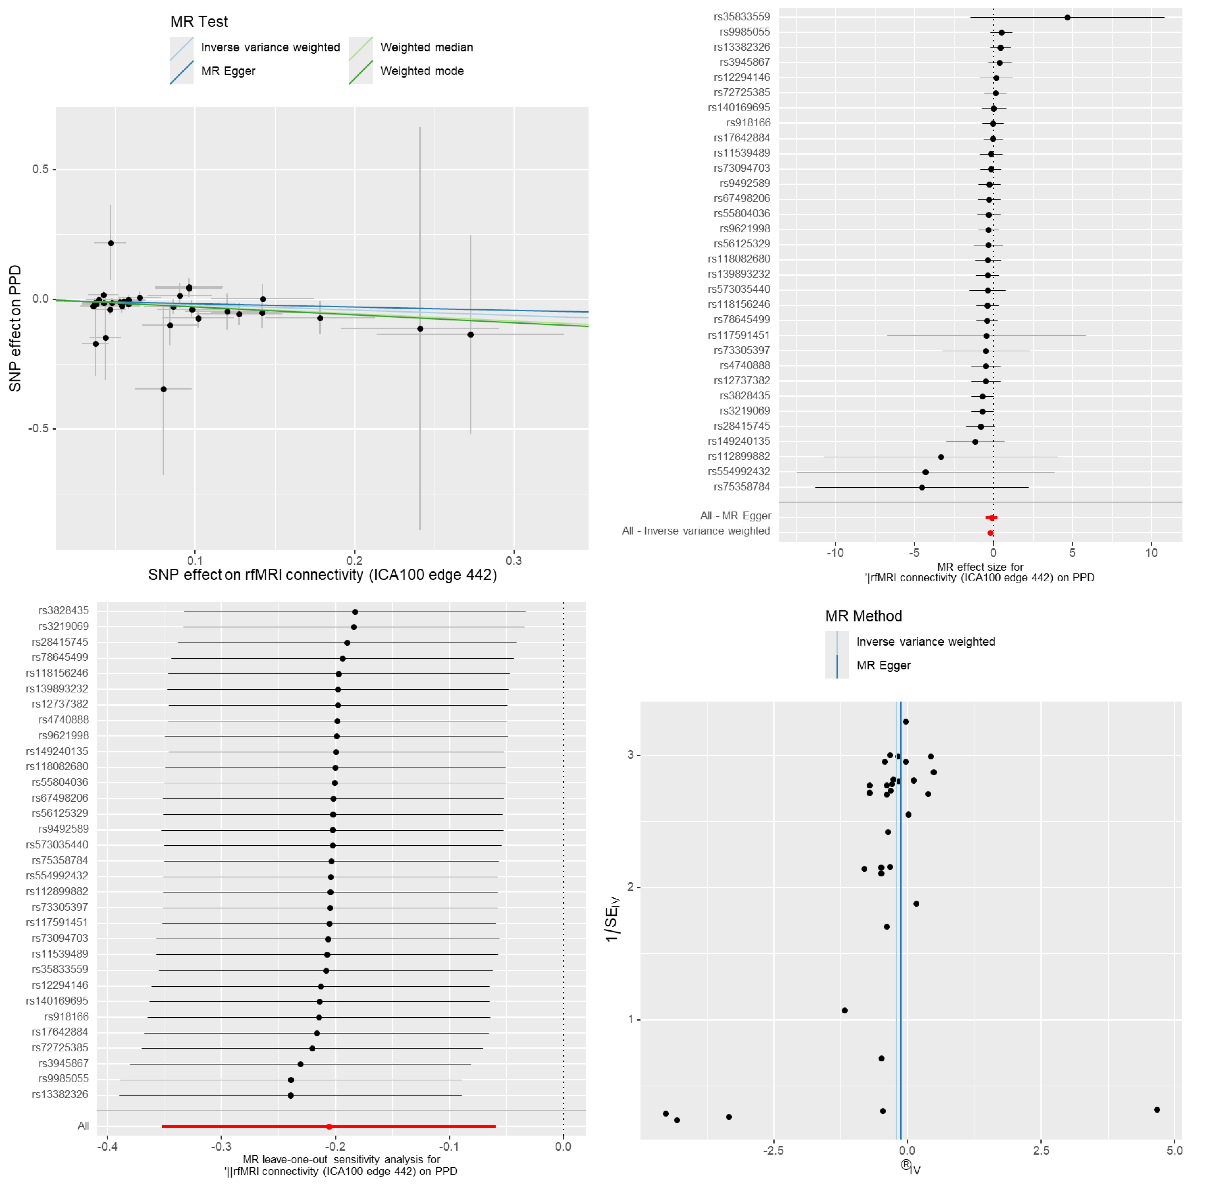


**Supplement Figure 6. Sensitivity MR analysis of the effect of rfMRI connectivity (ICA100 edge 442) on PPD.**
