# Supplementary material for: Integrated proteomic, transcriptomic, and epigenomic profiling identifies SRA1 as a novel therapeutic target for postpartum depression
Source: Research Square preprint supplement (doi:10.21203/rs.3.rs-7125352/v1), 2025-07-23
Supplement: Supplementary file 3 [file 9699af16827491f8b68e34b1.xlsx]

## Sheet: Table description
Supplement Tables	Description
Supplement Table 1	Proteome wide Mendelian randomization analysis on PPD using proteomics from decode
Supplement Table 2	Proteome wide Mendelian randomization analysis on PPD using proteomics from FinnGen
Supplement Table 3	Colocalization results of cross-protein from decode and PPD
Supplement Table 4	Significant transcriptomic SMR results of SRA1 on PPD in different tissues
Supplement Table 5	Significant DNA methylation SMR results of SRA1 on PPD in blood and brain
Supplement Table 6	MR-PheWAS analysis results of SRA1
Supplement Table 7	Mendelian randomization analysis results of SRA1 on 91 blood metabolites
Supplement Table 8	Mendelian randomization analysis results of 91 blood metabolites on PPD
Supplement Table 9	Sensitivity MR analysis of the effect of significant blood metabolites on PPD.
Supplement Table 10	Mendelian randomization analysis results of SRA1 on 440 CSF metabolites
Supplement Table 11	Mendelian randomization analysis results of SRA1 on 962 brain metabolites
Supplement Table 12	Mendelian randomization analysis results of SRA1 on 3935 DIPs
Supplement Table 13	Mendelian randomization analysis results of 3935 DIPs on PPD
Supplement Table 14	Sensitivity MR analysis of the effect of cross significant DIPs on PPD.

## Sheet: ST1
Supplement Table1. Proteome wide Mendelian randomization analysis on PPD using proteomics from decode.
Exposure	Outcome	method	nsnp	b	lo_ci	up_ci	se	pval	p_fdr
SRA1	PPD	IVW	2	0.514839	0.276412	0.753265	0.121646	2.31348e-05	0.0263042
VAV1		Wald ratio	1	-1.02137	-1.57813	-0.464613	0.284061	0.000323631	0.181557
PGP		IVW	6	0.211344	0.0929457	0.329742	0.0604071	0.000467611	0.265837
HBEGF		Wald ratio	1	0.846614	0.342948	1.35028	0.256972	0.000985711	0.276492
CD5L		IVW	5	-0.156232	-0.252433	-0.0600321	0.0490818	0.00145706	0.480113
ROR1		IVW	2	-0.16903	-0.276331	-0.0617283	0.0547456	0.00201814	0.480113
AKR1A1		IVW	6	-0.129442	-0.211972	-0.046912	0.0421071	0.00211132	0.480113
TCEA2		Wald ratio	1	-0.300757	-0.493655	-0.10786	0.0984171	0.00224353	0.321276
TBCB		Wald ratio	1	0.604035	0.191274	1.0168	0.210593	0.00412732	0.321276
DKK1		IVW	6	0.24	0.0754655	0.404535	0.0839464	0.00425015	0.805404
ST13		Wald ratio	1	0.719466	0.225725	1.21321	0.251908	0.00428933	0.321276
ADK		Wald ratio	1	-0.757576	-1.27815	-0.237005	0.265597	0.00433974	0.321276
CCL27		Wald ratio	1	-0.804688	-1.36104	-0.248333	0.283854	0.00458454	0.321276
DMKN		Wald ratio	1	-0.65659	-1.11163	-0.201548	0.232164	0.00468215	0.321276
PRG3		IVW	2	-0.425446	-0.729925	-0.120967	0.155346	0.00616845	0.812233
ACADVL		Wald ratio	1	0.748963	0.212199	1.28573	0.273859	0.0062409	0.321276
MANSC4		IVW	7	-0.0863272	-0.148418	-0.024236	0.0316792	0.00642928	0.812233
BPNT1		Wald ratio	1	-0.647315	-1.11385	-0.180784	0.238026	0.00653783	0.321276
COMT		Wald ratio	1	-0.562044	-0.967397	-0.156691	0.206813	0.00657479	0.321276
NADK		Wald ratio	1	-0.290323	-0.502129	-0.0785161	0.108065	0.00721904	0.321276
PIGR		Wald ratio	1	-0.26142	-0.452874	-0.0699649	0.097681	0.00744491	0.321276
TMEM106B		Wald ratio	1	-0.303763	-0.528566	-0.0789606	0.114695	0.00808648	0.324037
DLL4		Wald ratio	1	-0.628775	-1.11205	-0.145502	0.246568	0.0107689	0.401749
LAMC2		IVW	4	0.102832	0.0236152	0.182049	0.0404167	0.0109499	0.996593
AGT		IVW	2	0.225701	0.0518243	0.399577	0.0887123	0.0109533	0.996593
HS3ST3B1		Wald ratio	1	-0.911885	-1.61877	-0.205	0.360656	0.0114581	0.401749
HEXB		IVW	2	-0.154136	-0.274282	-0.0339894	0.0612991	0.0119206	0.996593
AK1		Wald ratio	1	0.858569	0.183494	1.53364	0.344426	0.0126757	0.408475
PCNP		Wald ratio	1	-0.508578	-0.912108	-0.105049	0.205882	0.0135023	0.408475
LOXL3		Wald ratio	1	-0.3859	-0.693173	-0.0786271	0.156772	0.0138343	0.408475
DPY30		Wald ratio	1	0.485742	0.092586	0.878899	0.20059	0.0154537	0.426657
CCL15		IVW	4	0.0470569	0.00887163	0.0852421	0.0194823	0.0157192	0.996593
EPHA10		Wald ratio	1	0.580769	0.108359	1.05318	0.241026	0.0159711	0.426657
GPCPD1		IVW	2	0.349577	0.0637313	0.635422	0.145839	0.0165301	0.996593
PDGFRB		IVW	7	-0.0372143	-0.0682264	-0.00620222	0.0158225	0.0186734	0.996593
ADGRF5		IVW	4	0.0634521	0.00993432	0.11697	0.027305	0.0201347	0.996593
GALNT16		IVW	3	-0.146878	-0.27085	-0.0229051	0.0632513	0.020226	0.996593
TFPI		Wald ratio	1	0.391209	0.0609524	0.721465	0.168498	0.020247	0.510465
LCN1		Wald ratio	1	0.48855	0.0738931	0.903206	0.211559	0.0209281	0.510465
PCBD1		IVW	6	-0.196769	-0.363861	-0.0296764	0.0852513	0.0209933	0.996593
EPHA5		IVW	2	0.291113	0.0430545	0.539172	0.12656	0.0214375	0.996593
TMEM106A		Wald ratio	1	-0.532203	-0.990644	-0.0737627	0.233898	0.0228842	0.528264
IBSP		Wald ratio	1	-0.311441	-0.581356	-0.0415254	0.137712	0.0237259	0.528264
SNX1		Wald ratio	1	0.242028	0.0311448	0.452911	0.107593	0.0244828	0.528264
GUCA2B		IVW	2	0.242657	0.0299799	0.455334	0.108509	0.0253327	0.996593
IL1R2		IVW	5	0.0636224	0.00771486	0.11953	0.0285242	0.0257165	0.996593
ADAM23		IVW	7	0.0485327	0.0057511	0.0913143	0.0218274	0.0261834	0.996593
CD59		IVW	3	0.156726	0.0176569	0.295795	0.0709537	0.027185	0.996593
VAT1		Wald ratio	1	-0.452774	-0.855352	-0.0501949	0.205397	0.0274977	0.54666
TNFAIP3		Wald ratio	1	0.19489	0.0205912	0.369188	0.0889279	0.0284121	0.54666
HK2		IVW	2	0.395661	0.0412562	0.750067	0.180819	0.0286577	0.996593
ANKRD27		Wald ratio	1	-0.54023	-1.0246	-0.0558621	0.247126	0.0288122	0.54666
MAP2K1		Wald ratio	1	0.474153	0.0479144	0.900392	0.217469	0.0292332	0.54666
RBM17		IVW	3	0.156565	0.0153436	0.297786	0.0720515	0.0297838	0.996593
SERPINA10		IVW	7	0.066444	0.00640922	0.126479	0.03063	0.030064	0.996593
TREM2		IVW	7	-0.0965851	-0.183917	-0.00925331	0.044557	0.0301835	0.996593
IL10RB		Wald ratio	1	-0.405674	-0.772652	-0.038695	0.187234	0.0302603	0.547613
CDON		IVW	4	0.0723654	0.00663651	0.138094	0.0335352	0.0309358	0.996593
ENPP6		Wald ratio	1	0.513341	0.0438051	0.982877	0.239559	0.0321246	0.556596
DNAJB9		Wald ratio	1	-0.929527	-1.78277	-0.076289	0.435326	0.0327409	0.556596
PPT1		IVW	2	-0.137447	-0.263794	-0.0110995	0.0644628	0.0329916	0.996593
OMG		Wald ratio	1	-0.335289	-0.645801	-0.0247779	0.158424	0.0343106	0.566125
PRSS2		IVW	5	-0.149697	-0.288502	-0.0108923	0.0708188	0.034532	0.996593
PCOLCE		IVW	2	-0.17041	-0.328944	-0.0118765	0.0808846	0.0351321	0.996593
IL1R1		IVW	2	-0.147037	-0.284441	-0.00963314	0.0701041	0.0359571	0.996593
GPT		Wald ratio	1	-0.560878	-1.08511	-0.0366467	0.267465	0.0359923	0.576904
C8G		IVW	5	-0.0802214	-0.155984	-0.0044586	0.0386545	0.0379546	0.996593
GBP1		IVW	3	0.326982	0.0181232	0.63584	0.157581	0.0379857	0.996593
COL11A2		IVW	4	0.1589	0.00761294	0.310187	0.0771872	0.0395297	0.996593
CAT		IVW	3	0.142179	0.00654073	0.277817	0.069203	0.0399259	0.996593
UBLCP1		IVW	4	0.177928	0.00817326	0.347682	0.0866095	0.03994	0.996593
FAM3D		IVW	4	0.098086	0.00430187	0.19187	0.047849	0.0403737	0.996593
TLR3		IVW	8	0.0669797	0.00290055	0.131059	0.0326934	0.0404895	0.996593
STC1		Wald ratio	1	-0.345817	-0.676908	-0.0147251	0.168924	0.0406414	0.59489
ALDH2		Wald ratio	1	0.479737	0.0203286	0.939146	0.234392	0.0406847	0.59489
PRPSAP1		Wald ratio	1	0.356996	0.0141975	0.699794	0.174897	0.0412333	0.59489
CRNN		Wald ratio	1	-0.22291	-0.437895	-0.0079257	0.109686	0.0421275	0.59489
HBQ1		Wald ratio	1	0.344655	0.0117882	0.677522	0.16983	0.0424164	0.59489
GSTT2B		IVW	2	-0.750161	-1.47686	-0.0234614	0.370765	0.0430445	0.996593
TGFBR3		IVW	2	0.270761	0.00713872	0.534383	0.134501	0.0441067	0.996593
CLINT1		Wald ratio	1	-0.497368	-0.982211	-0.0125263	0.247368	0.0443637	0.607025
PZP		IVW	9	0.144161	0.00261633	0.285705	0.0722166	0.045909	0.996593
CXCL11		IVW	2	0.0763905	0.000970347	0.151811	0.0384796	0.0471203	0.996593
C5		IVW	2	0.255795	0.00316278	0.508427	0.128894	0.0471959	0.996593
STX7		Wald ratio	1	-0.29462	-0.585858	-0.00338173	0.148591	0.0473944	0.617032
GPNMB		IVW	4	-0.103523	-0.20596	-0.00108653	0.0522636	0.0476149	0.996593
MIF		Wald ratio	1	-0.506589	-1.00878	-0.00439239	0.256223	0.0480255	0.617032
NEK7		Wald ratio	1	0.283852	0.00199691	0.565708	0.143804	0.0483947	0.617032
TIRAP		IVW	3	-0.142821	-0.284801	-0.000841956	0.0724385	0.0486527	0.996593
NEGR1		IVW	2	-0.20504	-0.409085	-0.000995821	0.104104	0.0488882	0.996593
CBLN1		IVW	8	-0.136513	-0.273622	0.000596446	0.0699537	0.0510007	0.996593
EPHA4		IVW	2	-0.184721	-0.370421	0.00097822	0.0947446	0.0512148	0.996593
PLAUR		IVW	3	0.116123	-0.000932161	0.233178	0.0597219	0.0518482	0.996593
AKR1B1		IVW	2	-0.242993	-0.489001	0.00301559	0.125514	0.0528709	0.996593
CPA4		IVW	12	-0.0368373	-0.0742207	0.000546106	0.0190732	0.0534376	0.996593
IL11RA		IVW	3	0.08269	-0.00145812	0.166838	0.0429327	0.0540997	0.996593
APP		Wald ratio	1	-0.34018	-0.687394	0.00703466	0.17715	0.0548213	0.655901
PPIE		Wald ratio	1	-0.633369	-1.28115	0.0144102	0.330499	0.0553144	0.655901
CNP		Wald ratio	1	-0.365217	-0.740174	0.00973913	0.191304	0.0562504	0.655901
PEAR1		Wald ratio	1	0.427875	-0.0134113	0.869162	0.225146	0.0573763	0.655901
VEGFC		Wald ratio	1	0.324257	-0.0134059	0.661921	0.172277	0.059811	0.655901
FCN2		IVW	9	0.0811352	-0.00393853	0.166209	0.043405	0.0615865	0.996593
SRI		Wald ratio	1	0.220163	-0.0108525	0.451179	0.117865	0.0617726	0.655901
MSMP		Wald ratio	1	-0.407051	-0.834231	0.0201282	0.217949	0.0618113	0.655901
MMP13		Wald ratio	1	-0.453074	-0.928803	0.0226537	0.242718	0.0619482	0.655901
MCL1		Wald ratio	1	-0.112931	-0.231516	0.0056545	0.0605027	0.0619657	0.655901
FOLR3		IVW	11	-0.0499507	-0.102425	0.00252366	0.0267726	0.0620781	0.996593
LRP8		IVW	2	0.157071	-0.00828361	0.322426	0.0843646	0.0626296	0.996593
CLSTN1		IVW	6	-0.0375327	-0.0771396	0.00207431	0.0202076	0.0632613	0.996593
SRGN		IVW	5	0.123949	-0.00775028	0.255649	0.0671937	0.0650873	0.996593
LANCL1		IVW	2	-1.98959	-4.1049	0.125713	1.07924	0.0652535	0.996593
COLEC12		IVW	3	0.162157	-0.010423	0.334737	0.088051	0.0655299	0.996593
PLEKHA1		IVW	4	-0.0783686	-0.16202	0.00528283	0.0426793	0.0663251	0.996593
MAPK12		Wald ratio	1	0.280628	-0.0190157	0.580272	0.15288	0.0664144	0.689972
TNR		Wald ratio	1	-0.238783	-0.498129	0.0205627	0.132319	0.0711377	0.722788
SERPINA9		IVW	4	-0.132365	-0.276485	0.0117538	0.0735302	0.071837	0.996593
SERPINC1		Wald ratio	1	2.92543	-0.273646	6.12452	1.63218	0.0730779	0.722788
CHGA		IVW	5	-0.0925666	-0.194118	0.00898498	0.0518121	0.0740046	0.996593
MAP1LC3A		Wald ratio	1	0.471774	-0.0458871	0.989435	0.264113	0.0740572	0.722788
OBP2B		IVW	4	-0.0906337	-0.190238	0.00897091	0.0508187	0.0745095	0.996593
REN		IVW	5	0.262023	-0.0264107	0.550456	0.14716	0.0749891	0.996593
ATXN3		IVW	4	0.106659	-0.011285	0.224602	0.0601754	0.0763174	0.996593
PIANP		Wald ratio	1	-1.45984	-3.07872	0.159045	0.82596	0.0771543	0.722788
PIANP		Wald ratio	1	-1.32628	-2.79706	0.144495	0.750397	0.0771543	0.722788
FIS1		Wald ratio	1	-0.158092	-0.333495	0.0173121	0.0894917	0.0773035	0.722788
SLITRK6		IVW	4	-0.120689	-0.255317	0.0139381	0.0686875	0.0789042	0.996593
VTN		IVW	11	-0.0375952	-0.0796624	0.00447214	0.0214629	0.0798368	0.996593
CFHR4		IVW	14	0.0399837	-0.0047854	0.0847527	0.0228414	0.0800331	0.996593
RECQL		IVW	7	0.0823701	-0.00986911	0.174609	0.0470608	0.0800682	0.996593
CFI		IVW	3	-0.13984	-0.29743	0.0177504	0.0804032	0.0819938	0.996593
SOD3		IVW	9	0.0697057	-0.00885728	0.148269	0.0400832	0.0820299	0.996593
BPIFA2		Wald ratio	1	-0.294271	-0.626042	0.0375	0.169271	0.0821295	0.746217
ENTPD6		Wald ratio	1	-0.232592	-0.495799	0.0306144	0.134289	0.0832689	0.746217
HS6ST1		IVW	2	-0.140819	-0.300458	0.0188211	0.0814489	0.0838232	0.996593
LRP11		IVW	9	0.0462011	-0.00629258	0.0986948	0.0267825	0.0845187	0.996593
CA11		Wald ratio	1	0.178826	-0.0243774	0.38203	0.103675	0.0845513	0.746217
MAPK3		IVW	2	-0.0970076	-0.207381	0.0133659	0.056313	0.0849519	0.996593
BOLA1		Wald ratio	1	2.17843	-0.301564	4.65842	1.2653	0.08513	0.746217
EVL		IVW	4	0.23183	-0.0326826	0.496343	0.134955	0.0858282	0.996593
NEGR1		Wald ratio	1	-0.184211	-0.395362	0.0269408	0.10773	0.08728	0.75278
ST8SIA6		Wald ratio	1	-0.437354	-0.9407	0.0659922	0.256809	0.0885624	0.75278
EMILIN3		IVW	6	0.0889046	-0.0134689	0.191278	0.0522314	0.0887311	0.996593
AMY1A		IVW	9	0.045652	-0.00692352	0.0982275	0.0268242	0.0887754	0.996593
A4GALT		IVW	4	0.0686013	-0.0106134	0.147816	0.0404157	0.0896221	0.996593
TCL1A		IVW	3	-0.115516	-0.248906	0.0178742	0.0680563	0.0896283	0.996593
TWSG1		IVW	3	-0.189285	-0.408739	0.03017	0.111967	0.0909237	0.996593
CXCL12		IVW	3	0.144358	-0.023758	0.312473	0.0857733	0.0923725	0.996593
ARL3		IVW	2	0.138632	-0.0230928	0.300358	0.0825129	0.0929319	0.996593
APLP2		Wald ratio	1	0.175162	-0.0295621	0.379885	0.104451	0.0935472	0.760965
WFIKKN2		IVW	7	0.0589495	-0.0100876	0.127987	0.035223	0.0942077	0.996593
SUMO3		Wald ratio	1	-0.399691	-0.868519	0.0691358	0.239198	0.094728	0.760965
SNPH		IVW	2	-0.268477	-0.583796	0.0468409	0.160877	0.0951491	0.996593
NQO1		IVW	9	-0.0410794	-0.0893978	0.00723898	0.0246522	0.0956425	0.996593
PHPT1		IVW	2	-0.195501	-0.425536	0.0345331	0.117364	0.0957608	0.996593
IL17RA		IVW	9	0.0474492	-0.00856334	0.103462	0.0285779	0.096844	0.996593
CDNF		IVW	5	-0.0928307	-0.202533	0.0168717	0.0559706	0.0972042	0.996593
RELT		Wald ratio	1	0.440199	-0.0807309	0.96113	0.265781	0.0976712	0.760965
CADM1		Wald ratio	1	0.158207	-0.0291365	0.34555	0.0955834	0.0978895	0.760965
EIF2B1		Wald ratio	1	0.406023	-0.0753271	0.887373	0.245587	0.0982745	0.760965
ENO2		Wald ratio	1	-1.26157	-2.75753	0.234393	0.763246	0.0983513	0.760965
DAPP1		Wald ratio	1	0.369538	-0.0695291	0.808604	0.224014	0.0990204	0.760965
BCAM		IVW	6	0.0894232	-0.0168478	0.195694	0.0542199	0.0990925	0.996593
DNAJC10		Wald ratio	1	0.28716	-0.0560311	0.63035	0.175097	0.101005	0.76339
HOMER2		Wald ratio	1	0.327492	-0.0653669	0.72035	0.200438	0.102284	0.76339
GDF15		IVW	6	0.0575787	-0.0116948	0.126852	0.0353436	0.103289	0.996593
IGF1R		Wald ratio	1	-0.430025	-0.948702	0.0886514	0.264631	0.104163	0.76339
PLG		IVW	4	-0.0934295	-0.206192	0.0193332	0.057532	0.104385	0.996593
NOTCH3		Wald ratio	1	0.261062	-0.0546195	0.576743	0.161062	0.105044	0.76339
CXCL10		IVW	2	-0.295273	-0.653087	0.0625421	0.182559	0.105789	0.996593
TRIL		Wald ratio	1	0.288534	-0.0614662	0.638534	0.178571	0.10614	0.76339
RTN4R		IVW	5	0.0657036	-0.0144643	0.145872	0.040902	0.108193	0.996593
RGMA		IVW	4	-0.113561	-0.252644	0.0255227	0.070961	0.109526	0.996593
CFH		IVW	2	-0.0971502	-0.216847	0.0225464	0.0610697	0.111653	0.996593
CST3		IVW	3	-0.111314	-0.248646	0.0260187	0.0700675	0.112137	0.996593
PNKP		Wald ratio	1	0.209533	-0.0493347	0.468401	0.132075	0.112634	0.796227
CA8		IVW	6	0.0636563	-0.0152528	0.142565	0.0402597	0.113846	0.996593
NFASC		IVW	4	-0.0531532	-0.119051	0.0127448	0.0336214	0.113893	0.996593
CFHR3		Wald ratio	1	0.191667	-0.0460741	0.429407	0.121296	0.114072	0.796227
IDUA		IVW	4	-0.0440824	-0.0987989	0.0106342	0.0279166	0.114319	0.996593
REXO2		Wald ratio	1	-0.179884	-0.403559	0.0437911	0.11412	0.114963	0.796227
MDGA1		IVW	8	-0.0332979	-0.0747309	0.00813518	0.0211393	0.115219	0.996593
NPL		IVW	4	0.155033	-0.0384648	0.348531	0.0987234	0.116327	0.996593
LY75		IVW	9	0.0429642	-0.0106702	0.0965987	0.0273645	0.116398	0.996593
CXCL5		Wald ratio	1	0.159494	-0.0399797	0.358967	0.101772	0.117076	0.79685
NDST1		IVW	2	0.149268	-0.0377864	0.336323	0.0954361	0.117802	0.996593
MXRA8		Wald ratio	1	-0.217164	-0.489371	0.055042	0.138881	0.117894	0.79685
NBL1		IVW	2	0.368713	-0.0946007	0.832026	0.236384	0.118807	0.996593
IL2RA		Wald ratio	1	0.309793	-0.0819454	0.701532	0.199867	0.121142	0.805645
CTSB		IVW	6	0.0552197	-0.0146184	0.125058	0.0356317	0.121205	0.996593
GCKR		Wald ratio	1	0.232102	-0.0621247	0.526328	0.150115	0.122067	0.805645
CLEC1B		IVW	2	-0.123158	-0.279578	0.0332632	0.0798065	0.122782	0.996593
CD177		IVW	13	0.0708146	-0.0193098	0.160939	0.0459818	0.123547	0.996593
IL6ST		IVW	4	-0.0776954	-0.17677	0.0213791	0.0505482	0.12428	0.996593
RNASE1		IVW	5	0.104027	-0.0289598	0.237014	0.0678505	0.125231	0.996593
CST5		IVW	7	0.0514725	-0.0144424	0.117387	0.0336301	0.12588	0.996593
ERAP1		IVW	11	0.0287817	-0.0081136	0.0656771	0.0188242	0.12627	0.996593
TNFAIP8		IVW	2	-0.128928	-0.294333	0.0364772	0.0843903	0.126573	0.996593
RTP4		IVW	4	0.06298	-0.0178375	0.143798	0.0412334	0.126661	0.996593
LPO		IVW	2	-0.0806325	-0.184537	0.023272	0.0530125	0.128258	0.996593
TXNDC15		IVW	3	0.0593351	-0.0171843	0.135854	0.0390405	0.128553	0.996593
LRRC32		Wald ratio	1	-0.422799	-0.968658	0.123059	0.278499	0.12898	0.832455
RNASET2		IVW	5	0.0515666	-0.0150436	0.118177	0.0339848	0.12918	0.996593
CAMK2D		Wald ratio	1	-0.455581	-1.04492	0.133759	0.300683	0.129734	0.832455
UROS		IVW	4	0.11496	-0.0340444	0.263965	0.0760228	0.130488	0.996593
TAPBPL		IVW	7	0.0423488	-0.0125844	0.097282	0.0280271	0.130791	0.996593
PLG		IVW	5	-0.0712166	-0.163892	0.0214591	0.0472835	0.132026	0.996593
ADAMTSL2		IVW	4	0.173944	-0.0531718	0.40106	0.115875	0.133322	0.996593
PCSK9		IVW	6	-0.0687727	-0.158572	0.0210268	0.0458161	0.13334	0.996593
A4GNT		Wald ratio	1	0.327189	-0.100338	0.754716	0.218126	0.133614	0.832455
LAYN		Wald ratio	1	-0.384321	-0.886501	0.117859	0.256214	0.133614	0.832455
GCLM		IVW	2	0.207502	-0.0640975	0.479101	0.138571	0.134279	0.996593
SRL		Wald ratio	1	-0.172996	-0.399595	0.0536034	0.115612	0.134562	0.832455
ANXA11		IVW	3	-0.181468	-0.419516	0.05658	0.121453	0.135139	0.996593
PEX14		Wald ratio	1	-0.375246	-0.868134	0.117642	0.251473	0.13565	0.832455
CXCL8		Wald ratio	1	-0.380952	-0.882445	0.12054	0.255864	0.136517	0.832455
FLRT3		IVW	7	0.033704	-0.0106991	0.0781072	0.0226547	0.136822	0.996593
NMB		IVW	2	0.216166	-0.0689877	0.501319	0.145486	0.137329	0.996593
HSPB1		IVW	6	-0.0651962	-0.151321	0.0209287	0.0439413	0.137885	0.996593
THG1L		IVW	3	0.0535052	-0.0177719	0.124782	0.0363658	0.141209	0.996593
TMEM9		Wald ratio	1	-0.300305	-0.700671	0.100061	0.204268	0.141521	0.850227
ASRGL1		IVW	2	0.0955508	-0.0320022	0.223104	0.0650781	0.142037	0.996593
DPT		IVW	5	-0.0798961	-0.186938	0.0271461	0.0546134	0.143484	0.996593
FGFR3		IVW	4	-0.122568	-0.287102	0.0419662	0.083946	0.144268	0.996593
DSC2		IVW	3	0.125684	-0.0431346	0.294503	0.086132	0.144509	0.996593
PRKCA		Wald ratio	1	-0.394737	-0.926397	0.136923	0.271255	0.145607	0.850227
ADI1		Wald ratio	1	0.315266	-0.111436	0.741969	0.217706	0.14758	0.850227
BID		Wald ratio	1	0.364661	-0.129262	0.858583	0.252001	0.14788	0.850227
PPID		IVW	2	-0.0766938	-0.181099	0.0277111	0.0532678	0.14993	0.996593
DOK2		Wald ratio	1	0.580645	-0.215175	1.37647	0.406031	0.152702	0.850227
SERPINA5		IVW	2	-0.0748372	-0.17769	0.0280158	0.052476	0.153833	0.996593
GLRX2		IVW	3	0.0885819	-0.0333466	0.21051	0.0622084	0.15446	0.996593
GLO1		IVW	2	0.182111	-0.0687359	0.432958	0.127983	0.154756	0.996593
EPHB4		IVW	2	0.19115	-0.0732492	0.455549	0.134898	0.156483	0.996593
HNRNPAB		Wald ratio	1	0.277291	-0.1069	0.661482	0.196016	0.157176	0.850227
ABHD10		Wald ratio	1	-0.376299	-0.897879	0.145281	0.266112	0.157344	0.850227
REG3A		IVW	5	0.102698	-0.0397995	0.245195	0.0727027	0.157782	0.996593
MGAT1		Wald ratio	1	-0.460191	-1.1	0.179618	0.326433	0.158612	0.850227
CLEC3B		IVW	2	0.108808	-0.042482	0.260098	0.0771888	0.158647	0.996593
PCOLCE2		IVW	9	0.0394569	-0.0155952	0.094509	0.0280878	0.160089	0.996593
EIF1AD		IVW	4	0.0890263	-0.0357883	0.213841	0.0636809	0.162111	0.996593
PGLYRP2		IVW	5	0.0627373	-0.0252992	0.150774	0.0449166	0.162488	0.996593
ANXA2		IVW	3	0.0656	-0.0267698	0.15797	0.0471274	0.163931	0.996593
LGR4		Wald ratio	1	-0.344814	-0.830693	0.141065	0.247897	0.16424	0.850227
ADH1A		Wald ratio	1	0.174238	-0.0714164	0.419893	0.125334	0.164471	0.850227
DARS2		Wald ratio	1	-0.213232	-0.513881	0.0874168	0.153392	0.164496	0.850227
HABP4		IVW	2	0.212039	-0.0873818	0.51146	0.152766	0.165136	0.996593
UAP1		Wald ratio	1	-0.522788	-1.26107	0.215496	0.376676	0.165167	0.850227
COL6A2		IVW	6	0.0714808	-0.0294982	0.17246	0.0515199	0.165307	0.996593
RSPO4		IVW	3	-0.181192	-0.437496	0.0751108	0.130767	0.165865	0.996593
GABARAPL2		IVW	2	0.262252	-0.108754	0.633257	0.189288	0.165912	0.996593
XXYLT1		IVW	2	-0.0994202	-0.24008	0.0412398	0.0717653	0.165945	0.996593
CCL16		IVW	7	-0.0585843	-0.141508	0.0243398	0.0423082	0.166143	0.996593
EPO		Wald ratio	1	0.267728	-0.112359	0.647815	0.193922	0.167403	0.850227
COL9A1		IVW	2	0.216185	-0.091487	0.523858	0.156976	0.168454	0.996593
ACP6		IVW	15	-0.0245848	-0.0597035	0.0105339	0.0179177	0.170034	0.996593
PCSK2		Wald ratio	1	0.213675	-0.0926496	0.52	0.156288	0.171567	0.850227
ITPA		IVW	10	0.0411805	-0.0178974	0.100258	0.0301418	0.171868	0.996593
TAGLN2		Wald ratio	1	-0.205977	-0.50301	0.0910566	0.151547	0.174097	0.850227
TAGLN2		Wald ratio	1	-0.207974	-0.507888	0.0919397	0.153017	0.174097	0.850227
TES		Wald ratio	1	-0.284317	-0.694632	0.125998	0.209344	0.174422	0.850227
CST6		IVW	3	0.0980681	-0.0440042	0.24014	0.0724859	0.176079	0.996593
PTK7		IVW	2	0.196637	-0.0882477	0.481522	0.145349	0.176101	0.996593
TSSC4		Wald ratio	1	1.32704	-0.59844	3.25253	0.98239	0.176749	0.850227
CRP		IVW	2	-0.104379	-0.256894	0.0481349	0.0778134	0.179789	0.996593
RAB1A		Wald ratio	1	-0.317957	-0.782932	0.147018	0.237232	0.180155	0.850227
RBP5		Wald ratio	1	-0.352155	-0.867637	0.163328	0.263001	0.180576	0.850227
MASP1		Wald ratio	1	-0.220606	-0.543709	0.102497	0.164848	0.18082	0.850227
ACAA1		IVW	5	-0.0748312	-0.184533	0.0348708	0.0559704	0.18123	0.996593
SHH		IVW	2	-0.175295	-0.432374	0.0817848	0.131163	0.181398	0.996593
TCN1		IVW	5	-0.0524448	-0.129376	0.0244865	0.0392507	0.1815	0.996593
MMP2		IVW	2	0.167712	-0.0783729	0.413797	0.125553	0.181621	0.996593
SPINK7		Wald ratio	1	-0.147504	-0.363964	0.0689561	0.110439	0.181675	0.850227
POFUT1		IVW	5	0.0633987	-0.0297264	0.156524	0.0475128	0.182089	0.996593
CSGALNACT2		Wald ratio	1	0.216899	-0.102369	0.536167	0.162892	0.183008	0.850227
LCN2		Wald ratio	1	0.268657	-0.129448	0.666762	0.203115	0.185941	0.850227
ISLR2		IVW	4	0.0839037	-0.0407602	0.208567	0.063604	0.187117	0.996593
ELMO1		IVW	3	-0.26761	-0.666228	0.131008	0.203377	0.188229	0.996593
B3GALT6		Wald ratio	1	-0.356028	-0.887035	0.174979	0.270922	0.1888	0.850227
MGAT4C		Wald ratio	1	0.303063	-0.149409	0.755536	0.230853	0.189252	0.850227
FCGR3A		IVW	11	0.0350137	-0.0173488	0.0873761	0.0267155	0.189989	0.996593
PRTN3		IVW	6	0.117293	-0.0582687	0.292854	0.0895721	0.190373	0.996593
SEZ6L		IVW	3	-0.160962	-0.401917	0.0799925	0.122936	0.190427	0.996593
LMAN2L		IVW	2	-0.165658	-0.413711	0.0823958	0.126558	0.190552	0.996593
THYN1		Wald ratio	1	-0.358852	-0.896523	0.17882	0.274322	0.190826	0.850227
IL17B		Wald ratio	1	0.256625	-0.128815	0.642064	0.196653	0.191905	0.850227
F10		Wald ratio	1	-0.144599	-0.361998	0.0727991	0.110918	0.192348	0.850227
HAPLN1		IVW	3	0.131549	-0.0663517	0.329449	0.10097	0.192624	0.996593
DPP7		IVW	9	0.0675351	-0.0342007	0.169271	0.051906	0.193223	0.996593
GNMT		IVW	2	-0.0729949	-0.183104	0.0371142	0.0561781	0.193825	0.996593
CLIC5		IVW	6	-0.0417716	-0.104817	0.0212743	0.0321663	0.194076	0.996593
CD109		IVW	7	-0.0473834	-0.119061	0.0242946	0.0365704	0.195087	0.996593
BMPER		IVW	2	-0.151913	-0.382408	0.0785816	0.117599	0.196431	0.996593
SBDS		Wald ratio	1	-0.180063	-0.453595	0.0934684	0.139557	0.196964	0.850227
CHAD		Wald ratio	1	-0.345631	-0.870835	0.179573	0.267961	0.197101	0.850227
CD72		IVW	2	0.1529	-0.0798514	0.385652	0.118751	0.197895	0.996593
TLR2		Wald ratio	1	-0.800574	-2.02007	0.418919	0.62219	0.198198	0.850227
RAB22A		Wald ratio	1	0.271605	-0.142778	0.685988	0.21142	0.198907	0.850227
PLCG1		Wald ratio	1	0.243647	-0.12843	0.615725	0.189836	0.199329	0.850227
GXYLT1		IVW	6	0.0616185	-0.0327828	0.15602	0.0481639	0.200774	0.996593
ARG1		IVW	2	0.284443	-0.152739	0.721624	0.223052	0.202227	0.996593
PTPN9		Wald ratio	1	0.270655	-0.145356	0.686667	0.212251	0.20225	0.850227
CD58		IVW	3	-0.0921852	-0.233928	0.0495574	0.0723176	0.202406	0.996593
CTSO		IVW	2	-0.11819	-0.300174	0.063795	0.0928493	0.203047	0.996593
SCARA5		IVW	5	-0.107533	-0.273235	0.0581679	0.0845414	0.203387	0.996593
FBLN5		IVW	2	0.236434	-0.128019	0.600888	0.185946	0.203543	0.996593
CLN5		Wald ratio	1	-0.177326	-0.450814	0.0961628	0.139535	0.203788	0.850227
OSMR		IVW	2	-0.22495	-0.572259	0.122359	0.177199	0.204269	0.996593
FGFBP3		IVW	3	-0.058	-0.147659	0.0316594	0.0457446	0.204831	0.996593
SEMA3C		IVW	2	-0.192401	-0.490018	0.105215	0.151845	0.205123	0.996593
NRXN3		IVW	4	-0.0839007	-0.213711	0.0459092	0.0662295	0.205221	0.996593
EPHB6		IVW	3	0.0949838	-0.0521528	0.24212	0.0750697	0.205773	0.996593
EHBP1		Wald ratio	1	0.35376	-0.19493	0.902451	0.279944	0.206344	0.850227
NFKB1		Wald ratio	1	0.263318	-0.145388	0.672024	0.208524	0.206671	0.850227
SFRP4		IVW	2	0.0736422	-0.0411802	0.188465	0.0585829	0.208732	0.996593
DLK1		IVW	6	-0.0450472	-0.115458	0.0253635	0.0359238	0.209855	0.996593
CCL19		Wald ratio	1	0.358178	-0.201822	0.918178	0.285714	0.209979	0.850227
DECR2		IVW	6	0.054274	-0.0306859	0.139234	0.0433469	0.210539	0.996593
PLA2G2A		IVW	7	-0.0433505	-0.111299	0.0245984	0.0346678	0.211134	0.996593
CSF1R		IVW	2	-0.134495	-0.34551	0.0765197	0.107661	0.211573	0.996593
THBS2		Wald ratio	1	-0.239016	-0.614482	0.13645	0.191564	0.212139	0.850227
NUDT5		Wald ratio	1	0.226891	-0.129972	0.583754	0.182073	0.212708	0.850227
ITIH5		IVW	8	0.0607999	-0.0350286	0.156628	0.0488921	0.213664	0.996593
UNC5B		IVW	4	0.105869	-0.0613665	0.273105	0.0853245	0.214684	0.996593
BOLA3		Wald ratio	1	0.145503	-0.0843739	0.375379	0.117284	0.214753	0.850227
ARSB		IVW	2	0.130318	-0.0758051	0.336441	0.105165	0.215279	0.996593
DDX19A		Wald ratio	1	-0.229035	-0.592191	0.13412	0.185283	0.216408	0.850227
DDX19B		Wald ratio	1	-0.238605	-0.616934	0.139724	0.193025	0.216408	0.850227
FGFR1		IVW	2	0.156847	-0.0925202	0.406215	0.127228	0.217649	0.996593
TNFSF13B		IVW	3	0.173885	-0.102723	0.450493	0.141126	0.217904	0.996593
OAF		IVW	4	0.0643494	-0.0380152	0.166714	0.0522268	0.217907	0.996593
LEPR		IVW	9	0.0459416	-0.0272676	0.119151	0.0373517	0.218706	0.996593
NAPG		Wald ratio	1	-0.221458	-0.574635	0.131719	0.180193	0.219069	0.850227
KLK14		IVW	5	0.0635242	-0.0380038	0.165052	0.0518	0.220073	0.996593
BTNL9		Wald ratio	1	0.25957	-0.155581	0.674721	0.211812	0.220397	0.850227
ABLIM3		Wald ratio	1	-0.150037	-0.390183	0.0901101	0.122524	0.220744	0.850227
ANXA5		IVW	2	-0.209185	-0.544606	0.126236	0.171133	0.221574	0.996593
CCS		Wald ratio	1	0.137047	-0.0830416	0.357135	0.11229	0.222286	0.850227
CCL23		IVW	3	-0.0427538	-0.111459	0.0259516	0.0350537	0.222593	0.996593
KCNAB2		Wald ratio	1	0.23625	-0.1435	0.616	0.19375	0.22271	0.850227
CST1		IVW	3	-0.0400783	-0.104513	0.024356	0.0328747	0.222797	0.996593
SYK		Wald ratio	1	-0.194352	-0.50691	0.118206	0.159468	0.222939	0.850227
UBE2F		Wald ratio	1	0.253294	-0.154202	0.660791	0.207906	0.223106	0.850227
ANGPT1		Wald ratio	1	-0.243363	-0.636519	0.149794	0.20059	0.22504	0.850227
CD248		IVW	2	0.866157	-0.53357	2.26588	0.714147	0.225185	0.996593
DYNLL2		Wald ratio	1	0.300181	-0.185389	0.78575	0.24774	0.225635	0.850227
UBXN2B		Wald ratio	1	0.350993	-0.220132	0.922119	0.291391	0.228379	0.850227
PGM2		IVW	3	0.0888024	-0.0558278	0.233433	0.0737909	0.228809	0.996593
NPDC1		Wald ratio	1	0.403118	-0.253853	1.06009	0.335189	0.229109	0.850227
BET1L		Wald ratio	1	-1.83333	-4.82751	1.16085	1.52764	0.230098	0.850227
BTNL8		Wald ratio	1	0.891821	-0.56482	2.34846	0.743184	0.230139	0.850227
CASS4		Wald ratio	1	-0.288571	-0.762705	0.185562	0.241905	0.232903	0.850227
RPN1		Wald ratio	1	-0.107048	-0.282979	0.068883	0.0897606	0.233029	0.850227
PSME2		IVW	3	-0.164012	-0.434312	0.106287	0.137908	0.234327	0.996593
EPHB1		IVW	3	0.0488566	-0.0318266	0.12954	0.0411649	0.235286	0.996593
SEMA4A		Wald ratio	1	0.0953809	-0.0621716	0.252933	0.0803839	0.235398	0.850227
GGPS1		Wald ratio	1	-0.177795	-0.471491	0.115901	0.149845	0.235414	0.850227
UBASH3B		IVW	2	0.119907	-0.0789381	0.318751	0.101451	0.237241	0.996593
FER		Wald ratio	1	0.204724	-0.134803	0.544252	0.173228	0.237278	0.850227
ASIP		IVW	2	-0.0524433	-0.139616	0.0347292	0.0444757	0.238341	0.996593
KIAA1549L		IVW	7	-0.0665079	-0.177113	0.0440972	0.0564312	0.238571	0.996593
LRIG1		IVW	7	-0.0502679	-0.1339	0.0333644	0.0426695	0.238767	0.996593
SERPINB1		Wald ratio	1	-0.200758	-0.534848	0.133333	0.170455	0.238885	0.850227
REG1B		IVW	8	0.0697136	-0.0464394	0.185867	0.0592617	0.239448	0.996593
FH		Wald ratio	1	0.115775	-0.0779689	0.309519	0.098849	0.241505	0.850227
CRH		Wald ratio	1	-0.254062	-0.679645	0.171521	0.217134	0.241974	0.850227
C1orf198		Wald ratio	1	0.139082	-0.0939917	0.372156	0.118915	0.242166	0.850227
FAM20B		IVW	2	0.319777	-0.217133	0.856687	0.273934	0.243068	0.996593
TRDMT1		IVW	4	0.0484041	-0.0328832	0.129691	0.0414731	0.243162	0.996593
CRADD		IVW	2	-0.28706	-0.770518	0.196399	0.246663	0.244515	0.996593
RCN1		Wald ratio	1	0.119885	-0.0823285	0.322098	0.10317	0.245231	0.850227
NT5C		IVW	5	-0.0452695	-0.121686	0.0311469	0.038988	0.245595	0.996593
IL12RB1		Wald ratio	1	0.201011	-0.138458	0.54048	0.173198	0.245811	0.850227
TSG101		Wald ratio	1	0.105906	-0.0737271	0.28554	0.0916497	0.247863	0.850227
RSPO1		Wald ratio	1	0.0730604	-0.0510744	0.197195	0.0633341	0.248676	0.850227
PPCS		Wald ratio	1	-0.148293	-0.400702	0.104117	0.12878	0.24952	0.850227
S100A16		IVW	3	0.0800418	-0.0562541	0.216338	0.0695388	0.249716	0.996593
CYB5A		Wald ratio	1	-0.248521	-0.671834	0.174793	0.215976	0.249862	0.850227
ICOSLG		Wald ratio	1	-0.23183	-0.627268	0.163609	0.201754	0.250528	0.850227
CLPS		IVW	8	-0.0436699	-0.118224	0.0308846	0.038038	0.250944	0.996593
SIRPG		Wald ratio	1	0.103699	-0.0736592	0.281057	0.0904888	0.251801	0.850227
LIFR		IVW	5	0.0932733	-0.0666097	0.253156	0.081573	0.252858	0.996593
ATF6		Wald ratio	1	-0.308316	-0.837079	0.220446	0.269777	0.253098	0.850227
A1BG		IVW	4	0.0451822	-0.032589	0.122953	0.0396792	0.254834	0.996593
CALCB		IVW	2	0.0666152	-0.0481038	0.181334	0.0585301	0.255064	0.996593
FABP2		IVW	5	-0.0323114	-0.0880739	0.0234511	0.0284503	0.256075	0.996593
TMEM132D		IVW	6	-0.0467281	-0.127438	0.0339816	0.0411784	0.256471	0.996593
NRXN3		IVW	3	-0.0780312	-0.213436	0.057373	0.0690838	0.25868	0.996593
PATE4		Wald ratio	1	-0.125197	-0.342803	0.0924094	0.111024	0.259464	0.862852
SECTM1		IVW	4	-0.0762214	-0.208711	0.0562687	0.067597	0.259495	0.996593
NOTUM		IVW	3	-0.207802	-0.569178	0.153574	0.184375	0.259717	0.996593
TIMD4		IVW	4	0.0551979	-0.0416294	0.152025	0.0494017	0.263854	0.996593
SLITRK1		Wald ratio	1	0.236297	-0.179099	0.651693	0.211937	0.264875	0.862852
DNAJA4		Wald ratio	1	0.211901	-0.160755	0.584557	0.190131	0.265063	0.862852
KYNU		IVW	4	0.0610415	-0.0463575	0.16844	0.0547954	0.265284	0.996593
SEMA6A		IVW	3	-0.176553	-0.487271	0.134164	0.158529	0.26541	0.996593
CLSTN2		IVW	7	-0.0520543	-0.143686	0.039577	0.0467506	0.265517	0.996593
PMEL		IVW	2	-0.0631517	-0.174462	0.048159	0.0567912	0.266139	0.996593
SIGLEC1		IVW	2	-0.257969	-0.713079	0.197142	0.232199	0.266577	0.996593
SVEP1		IVW	6	0.044133	-0.0337815	0.122047	0.0397523	0.266913	0.996593
TP53I3		IVW	6	-0.0365398	-0.101103	0.0280236	0.0329406	0.267315	0.996593
F10		IVW	2	-0.114018	-0.315631	0.0875958	0.102864	0.267676	0.996593
FSTL5		Wald ratio	1	-0.220976	-0.612316	0.170365	0.199663	0.268406	0.862852
TAGLN		IVW	2	0.222724	-0.171795	0.617243	0.201285	0.268506	0.996593
CNPY3		Wald ratio	1	-0.118777	-0.329275	0.0917212	0.107397	0.268744	0.862852
CD160		Wald ratio	1	0.26428	-0.204448	0.733008	0.239147	0.269118	0.862852
RBP4		Wald ratio	1	0.233918	-0.181006	0.648842	0.211696	0.269172	0.862852
TAPBP		IVW	5	0.0306781	-0.0237613	0.0851175	0.0277752	0.269371	0.996593
IRF3		Wald ratio	1	-0.216783	-0.603301	0.169734	0.197203	0.271641	0.862852
SCGB3A1		IVW	3	0.0847208	-0.0664746	0.235916	0.0771405	0.272089	0.996593
ADH1B		Wald ratio	1	-0.135777	-0.378857	0.107303	0.12402	0.273606	0.862852
GALP		Wald ratio	1	0.256275	-0.202871	0.715421	0.234258	0.273962	0.862852
LTBP4		Wald ratio	1	-0.242056	-0.675732	0.19162	0.221263	0.273967	0.862852
PSMD9		Wald ratio	1	0.122762	-0.0978005	0.343325	0.112532	0.275313	0.862852
MUC16		IVW	2	0.0975604	-0.0779415	0.273062	0.0895418	0.275911	0.996593
FCRL1		IVW	4	0.0422431	-0.0337768	0.118263	0.0387857	0.276091	0.996593
ALAD		IVW	7	-0.0744917	-0.208734	0.0597504	0.0684908	0.276765	0.996593
PPIH		IVW	2	-0.222828	-0.625939	0.180282	0.205669	0.278616	0.996593
POR		IVW	2	-0.0939225	-0.263916	0.0760709	0.0867313	0.278847	0.996593
AGER		Wald ratio	1	-0.116601	-0.327708	0.0945059	0.107708	0.279	0.86416
AMY2A		IVW	6	0.0416722	-0.0338142	0.117159	0.0385135	0.279245	0.996593
CPXM1		IVW	6	-0.0519584	-0.146244	0.0423277	0.0481051	0.280097	0.996593
AKR1D1		Wald ratio	1	0.298812	-0.243599	0.841222	0.27674	0.280251	0.86416
SVEP1		IVW	7	0.0404009	-0.0330203	0.113822	0.0374598	0.280804	0.996593
FCRL6		Wald ratio	1	0.117223	-0.0958481	0.330295	0.10871	0.280894	0.86416
SMAD1		Wald ratio	1	0.29	-0.2392	0.8192	0.27	0.282789	0.86416
B4GALT1		IVW	3	0.075788	-0.0625783	0.214154	0.070595	0.28302	0.996593
UGT1A1		IVW	2	-0.0631827	-0.178537	0.0521712	0.058854	0.283025	0.996593
MFNG		Wald ratio	1	-0.184337	-0.521265	0.152592	0.171902	0.28357	0.86416
MINPP1		Wald ratio	1	-1.17932	-3.34194	0.983291	1.10338	0.285145	0.86416
H6PD		IVW	6	0.0399759	-0.0334214	0.113373	0.0374476	0.285739	0.996593
SPINT1		IVW	2	-0.124449	-0.353413	0.104515	0.116818	0.28673	0.996593
GMPR2		IVW	2	0.063905	-0.0543515	0.182162	0.060335	0.289522	0.996593
CBR1		IVW	4	0.0589811	-0.0501832	0.168145	0.0556961	0.289608	0.996593
ARHGEF25		IVW	2	0.120624	-0.102939	0.344186	0.114062	0.290273	0.996593
HEXIM2		Wald ratio	1	-0.167585	-0.478765	0.143594	0.158765	0.291171	0.86416
CNTFR		IVW	4	-0.0693364	-0.198147	0.0594737	0.0657195	0.291409	0.996593
SERPINA11		IVW	5	-0.0550649	-0.157422	0.0472923	0.0522231	0.291692	0.996593
IL16		IVW	10	0.0241221	-0.0208589	0.0691031	0.0229495	0.293215	0.996593
STAT3		Wald ratio	1	0.0940947	-0.0814276	0.269617	0.0895522	0.293385	0.86416
KREMEN1		IVW	3	-0.0776563	-0.222804	0.0674915	0.074055	0.294348	0.996593
ADH7		IVW	4	0.0552802	-0.048086	0.158646	0.0527379	0.294543	0.996593
VIT		IVW	8	-0.0375646	-0.108044	0.0329147	0.0359588	0.296183	0.996593
SELPLG		Wald ratio	1	-0.0585314	-0.168386	0.0513232	0.0560482	0.296345	0.86416
BCL10		Wald ratio	1	-0.253996	-0.730941	0.222948	0.243339	0.29658	0.86416
NHEJ1		IVW	3	0.205309	-0.180882	0.5915	0.197036	0.297419	0.996593
ZFAND1		IVW	3	-0.0881748	-0.254131	0.0777815	0.0846716	0.297702	0.996593
DBNL		Wald ratio	1	0.318436	-0.281061	0.917933	0.305866	0.297831	0.86416
TLR1		Wald ratio	1	0.147505	-0.130268	0.425278	0.141721	0.297961	0.86416
CA13		Wald ratio	1	-0.0483814	-0.139723	0.0429598	0.0466026	0.299192	0.86416
PTGDS		Wald ratio	1	-0.0971631	-0.280652	0.0863262	0.093617	0.299326	0.86416
FKBP4		IVW	2	0.204564	-0.182952	0.592081	0.197713	0.30083	0.996593
DNAJB6		Wald ratio	1	-0.358824	-1.03906	0.321412	0.347059	0.301184	0.86416
SEMA6B		IVW	2	-0.330513	-0.957751	0.296724	0.320019	0.301701	0.996593
IFNAR1		IVW	7	-0.023761	-0.0689725	0.0214504	0.0230671	0.30297	0.996593
IL18RAP		Wald ratio	1	0.173006	-0.156466	0.502479	0.168098	0.303387	0.86416
NTN1		IVW	4	-0.0808122	-0.234785	0.073161	0.0785578	0.303622	0.996593
CASP3		Wald ratio	1	0.147201	-0.133539	0.427942	0.143235	0.304095	0.86416
LTF		IVW	4	-0.0608581	-0.176942	0.0552259	0.0592265	0.304162	0.996593
ACAP2		Wald ratio	1	-0.344178	-1.00199	0.31363	0.335616	0.305123	0.86416
PDGFD		IVW	4	-0.0379376	-0.110451	0.0345754	0.0369964	0.305156	0.996593
IGF2R		IVW	6	0.032804	-0.0299829	0.0955909	0.0320341	0.305819	0.996593
ERBB3		Wald ratio	1	-0.128638	-0.375249	0.117972	0.125822	0.306597	0.86416
GDI2		Wald ratio	1	0.144025	-0.132257	0.420306	0.14096	0.306904	0.86416
CPQ		IVW	6	0.0360226	-0.033144	0.105189	0.0352891	0.307356	0.996593
HGF		Wald ratio	1	0.126984	-0.117238	0.371206	0.124603	0.308152	0.86416
MRC1		IVW	9	0.108035	-0.0998339	0.315905	0.106056	0.308362	0.996593
HEBP1		IVW	5	-0.0311182	-0.0911646	0.0289281	0.0306359	0.309751	0.996593
PSMB1		IVW	2	0.0443311	-0.0417837	0.130446	0.0439361	0.312979	0.996593
KLC1		Wald ratio	1	0.155756	-0.147314	0.458826	0.154628	0.313791	0.86416
PTPRU		IVW	5	-0.10638	-0.313469	0.100709	0.105658	0.314013	0.996593
SIGLEC6		IVW	7	0.0320207	-0.0303709	0.0944122	0.0318324	0.314457	0.996593
COL3A1		Wald ratio	1	0.246114	-0.233731	0.725959	0.244819	0.314757	0.86416
CHRD		Wald ratio	1	0.20629	-0.195949	0.608529	0.205224	0.314803	0.86416
EBI3		IVW	8	-0.0402816	-0.118892	0.0383283	0.0401071	0.315209	0.996593
ISOC1		IVW	2	0.0797338	-0.0762412	0.235709	0.0795791	0.316371	0.996593
ACY1		IVW	2	0.20712	-0.198386	0.612627	0.206891	0.316774	0.996593
CDH5		IVW	2	-0.103914	-0.307578	0.09975	0.10391	0.317293	0.996593
VPS26A		Wald ratio	1	0.0814775	-0.0782184	0.241173	0.0814775	0.317311	0.86416
ASPH		IVW	2	-0.158451	-0.469027	0.152124	0.158457	0.317327	0.996593
S100A4		IVW	2	0.133891	-0.128688	0.396469	0.133969	0.317592	0.996593
LEAP2		IVW	5	-0.0476694	-0.141199	0.0458606	0.0477194	0.317817	0.996593
KIR2DL3		IVW	8	-0.103096	-0.306077	0.0998847	0.103562	0.319491	0.996593
PF4V1		IVW	2	0.0422352	-0.0410154	0.125486	0.0424748	0.320048	0.996593
SWAP70		IVW	5	0.0338929	-0.0330044	0.10079	0.0341312	0.320702	0.996593
ALCAM		IVW	4	0.0988543	-0.096335	0.294044	0.0995864	0.320881	0.996593
MPPED2		IVW	2	0.0974277	-0.0957078	0.290563	0.0985385	0.322797	0.996593
SMOC1		IVW	4	0.0822371	-0.0808336	0.245308	0.0831993	0.32294	0.996593
MMP8		IVW	3	0.0517116	-0.0509431	0.154366	0.0523749	0.323477	0.996593
CLEC4C		Wald ratio	1	-0.161464	-0.482153	0.159225	0.163617	0.32372	0.86416
INHBA		Wald ratio	1	0.155556	-0.153481	0.464593	0.157672	0.32385	0.86416
INHBA		Wald ratio	1	0.156884	-0.154792	0.468559	0.159018	0.32385	0.86416
UGDH		IVW	2	0.0554812	-0.0548586	0.165821	0.0562958	0.324364	0.996593
MAPRE2		Wald ratio	1	-0.112979	-0.338373	0.112414	0.114997	0.325875	0.86416
BPHL		Wald ratio	1	-0.14417	-0.432433	0.144093	0.147073	0.326956	0.86416
DNAJC27		Wald ratio	1	0.293333	-0.293215	0.879881	0.299259	0.326988	0.86416
INHBC		Wald ratio	1	-0.137066	-0.41139	0.137259	0.139961	0.327427	0.86416
SDSL		IVW	4	-0.0643686	-0.193245	0.0645077	0.0657532	0.327609	0.996593
TPM4		Wald ratio	1	0.20041	-0.20123	0.602049	0.204918	0.328074	0.86416
INSR		Wald ratio	1	-0.186014	-0.558825	0.186797	0.19021	0.328103	0.86416
ENGASE		IVW	6	0.0264112	-0.0266709	0.0794933	0.0270827	0.329458	0.996593
ANGPTL4		Wald ratio	1	-0.15582	-0.469812	0.158173	0.1602	0.330724	0.866992
EGF		IVW	2	0.275034	-0.280402	0.830471	0.283386	0.331783	0.996593
NCAN		IVW	2	-0.0816979	-0.247502	0.084106	0.0845938	0.334161	0.996593
PLEKHA7		IVW	3	0.0361857	-0.0374123	0.109784	0.03755	0.335213	0.996593
PRCP		IVW	3	0.0722765	-0.0748301	0.219383	0.0750544	0.335553	0.996593
PDE5A		IVW	2	-0.0645547	-0.196056	0.0669466	0.0670925	0.335962	0.996593
PSME1		Wald ratio	1	-0.248311	-0.754865	0.258243	0.258446	0.336661	0.87511
PCDH9		IVW	5	-0.0441237	-0.134176	0.045929	0.0459453	0.336877	0.996593
GC		Wald ratio	1	0.138638	-0.144348	0.421624	0.144381	0.336941	0.87511
SORCS1		Wald ratio	1	0.244131	-0.255837	0.7441	0.255086	0.338539	0.87521
HSPG2		IVW	5	0.0451614	-0.0474785	0.137801	0.0472653	0.339331	0.996593
SMAP1		IVW	4	-0.0408499	-0.124787	0.0430871	0.042825	0.340145	0.996593
CTSD		IVW	5	0.0542204	-0.0572835	0.165724	0.0568897	0.34055	0.996593
CCDC50		Wald ratio	1	0.330827	-0.350752	1.01241	0.347744	0.341426	0.878624
MFAP4		IVW	4	0.0867863	-0.0921021	0.265675	0.0912696	0.341666	0.996593
TNFSF14		IVW	2	0.106362	-0.112899	0.325622	0.111868	0.341716	0.996593
FCN3		IVW	5	-0.0607115	-0.186305	0.0648822	0.0640784	0.343406	0.996593
NRBP1		Wald ratio	1	-0.259813	-0.798355	0.278729	0.274766	0.344364	0.882137
C1QTNF5		IVW	2	-0.0758779	-0.23355	0.0817939	0.0804448	0.345563	0.996593
LRPAP1		IVW	4	0.0541079	-0.0584512	0.166667	0.0574281	0.346098	0.996593
ARHGAP25		Wald ratio	1	-0.0841014	-0.259101	0.0908986	0.0892857	0.346226	0.882729
PSG5		IVW	5	-0.074041	-0.228542	0.08046	0.078827	0.347585	0.996593
GPN1		Wald ratio	1	-0.1743	-0.538372	0.189771	0.185751	0.348061	0.882729
CREB3L4		IVW	3	-0.0615871	-0.190248	0.0670736	0.0656432	0.348137	0.996593
CD14		IVW	2	0.156685	-0.171892	0.485263	0.167641	0.349971	0.996593
RFESD		Wald ratio	1	0.199129	-0.219216	0.617474	0.213441	0.350849	0.882729
PAICS		Wald ratio	1	-0.346314	-1.07394	0.381308	0.371236	0.350889	0.882729
PGM1		IVW	2	0.1246	-0.137374	0.386573	0.13366	0.351226	0.996593
IFNLR1		IVW	3	0.171694	-0.190278	0.533666	0.18468	0.352534	0.996593
GRN		IVW	4	0.127061	-0.140917	0.395039	0.136724	0.352718	0.996593
DTX3L		Wald ratio	1	-0.369157	-1.14814	0.409824	0.39744	0.352973	0.884007
CFD		IVW	6	0.166396	-0.184923	0.517714	0.179244	0.353241	0.996593
NRP2		IVW	4	0.074109	-0.0829467	0.231165	0.0801304	0.355042	0.996593
PKLR		IVW	2	0.0968378	-0.108506	0.302182	0.104767	0.355323	0.996593
ADH5		IVW	3	0.0728431	-0.0821236	0.22781	0.0790646	0.356888	0.996593
SIGLEC14		IVW	6	-0.0189686	-0.0594351	0.0214979	0.0206462	0.358229	0.996593
CRAT		Wald ratio	1	-0.147287	-0.462016	0.167442	0.160576	0.359016	0.891382
STIM1		Wald ratio	1	-0.13775	-0.432471	0.156972	0.150368	0.359623	0.891382
VOPP1		IVW	2	-0.106495	-0.334593	0.121603	0.116376	0.360144	0.996593
KIT		Wald ratio	1	0.2527	-0.289158	0.794557	0.276458	0.360684	0.891382
GSTM3		IVW	8	-0.0204778	-0.0644475	0.0234919	0.0224335	0.361336	0.996593
KRT20		IVW	2	0.227268	-0.260978	0.715515	0.249105	0.361591	0.996593
ST3GAL1		IVW	2	0.0686751	-0.0794472	0.216797	0.0755726	0.363493	0.996593
S100A14		Wald ratio	1	-0.142052	-0.4492	0.165096	0.156708	0.364685	0.89411
PCYOX1		IVW	7	0.0306805	-0.0356577	0.0970188	0.0338461	0.364686	0.996593
PENK		IVW	7	0.023685	-0.0275509	0.0749209	0.0261408	0.364907	0.996593
PDGFRL		IVW	6	-0.0376602	-0.119436	0.0441153	0.0417222	0.366716	0.996593
THBS2		IVW	5	-0.0290431	-0.0921864	0.0341001	0.032216	0.367315	0.996593
CST7		IVW	8	0.0186328	-0.0219556	0.0592212	0.0207084	0.368241	0.996593
ART4		IVW	4	0.0198924	-0.0234552	0.06324	0.0221161	0.368413	0.996593
LCP1		IVW	4	0.0807398	-0.0954896	0.256969	0.0899129	0.369198	0.996593
HAPLN4		Wald ratio	1	-0.138667	-0.441813	0.16448	0.154667	0.369958	0.89411
IDH1		IVW	3	-0.0548238	-0.174838	0.0651906	0.0612318	0.370601	0.996593
IGDCC4		IVW	7	-0.0449405	-0.143779	0.0538977	0.0504277	0.372828	0.996593
CPZ		Wald ratio	1	-0.178571	-0.572321	0.215179	0.200893	0.374063	0.89411
EPB41		IVW	2	0.161004	-0.194109	0.516117	0.18118	0.374196	0.996593
MCEE		Wald ratio	1	-0.183252	-0.587621	0.221117	0.206311	0.374414	0.89411
RSPO3		IVW	2	-0.0473765	-0.151973	0.0572194	0.0533653	0.37466	0.996593
RSPO3		IVW	2	-0.0520521	-0.167124	0.0630199	0.0587102	0.375298	0.996593
SEMA7A		Wald ratio	1	-0.19685	-0.632063	0.238362	0.222047	0.375335	0.89411
MANSC1		IVW	3	-0.0443574	-0.142811	0.0540961	0.0502314	0.377203	0.996593
SPOCK2		IVW	2	0.0755591	-0.0921551	0.243273	0.0855684	0.377223	0.996593
LILRB1		IVW	10	0.0266656	-0.0327232	0.0860544	0.0303004	0.378837	0.996593
POLI		Wald ratio	1	-0.136669	-0.441135	0.167797	0.15534	0.378963	0.89411
GNGT2		Wald ratio	1	-4.74093	-15.3127	5.83088	5.39378	0.379422	0.89411
PRDX6		Wald ratio	1	0.11645	-0.143713	0.376612	0.132736	0.380323	0.89411
HMOX1		IVW	2	0.14679	-0.181408	0.474987	0.167447	0.380687	0.996593
COL10A1		IVW	3	0.0466964	-0.0577943	0.151187	0.0533116	0.381077	0.996593
IL2RB		Wald ratio	1	0.155992	-0.194298	0.506281	0.178719	0.382754	0.89411
CXCL6		IVW	4	0.0278908	-0.0347546	0.0905361	0.0319619	0.382867	0.996593
APMAP		IVW	2	0.154847	-0.19348	0.503173	0.177718	0.383587	0.996593
LRIG3		IVW	7	0.0350534	-0.0438833	0.11399	0.0402738	0.384094	0.996593
NAGK		IVW	5	0.062896	-0.0787662	0.204558	0.0722766	0.384185	0.996593
SFTPB		IVW	4	0.0273558	-0.0342832	0.0889948	0.0314485	0.384377	0.996593
IL20RA		Wald ratio	1	0.202572	-0.254341	0.659486	0.233119	0.384866	0.89411
CILP2		Wald ratio	1	-0.133803	-0.435739	0.168134	0.154049	0.385082	0.89411
CXCL16		IVW	6	-0.0421225	-0.137192	0.0529469	0.0485048	0.385165	0.996593
PSG3		IVW	6	-0.0668232	-0.21795	0.0843034	0.0771054	0.386135	0.996593
CSRP1		Wald ratio	1	0.126305	-0.160125	0.412735	0.146138	0.387431	0.89411
RRM2B		IVW	2	-0.0697104	-0.227806	0.0883853	0.0806611	0.387457	0.996593
ZYX		Wald ratio	1	0.155894	-0.199341	0.511128	0.181242	0.389712	0.89411
HAVCR2		IVW	6	0.030251	-0.0387067	0.0992087	0.0351825	0.389882	0.996593
LRRTM2		Wald ratio	1	-0.141852	-0.465838	0.182134	0.165299	0.390806	0.89411
AOC1		IVW	8	-0.0301128	-0.0991804	0.0389549	0.0352386	0.392806	0.996593
NAGLU		IVW	12	0.0221457	-0.0287525	0.0730439	0.0259685	0.393774	0.996593
GRAP2		Wald ratio	1	-0.328877	-1.08484	0.427086	0.385695	0.393833	0.89411
AHSG		IVW	5	0.0556915	-0.0723574	0.18374	0.0653311	0.393964	0.996593
LRRTM4		Wald ratio	1	-0.235955	-0.779176	0.307266	0.277154	0.394574	0.89411
FCN2		IVW	6	0.0353864	-0.0460974	0.11687	0.0415733	0.39467	0.996593
CCT5		Wald ratio	1	-0.246914	-0.816192	0.322365	0.290448	0.395263	0.89411
HP		IVW	6	-0.0210346	-0.0695616	0.0274924	0.0247587	0.395555	0.996593
MPST		IVW	2	-0.11115	-0.368156	0.145857	0.131126	0.396628	0.996593
NSFL1C		Wald ratio	1	0.221095	-0.291765	0.733955	0.261663	0.398132	0.89411
NMT1		Wald ratio	1	-0.236443	-0.784902	0.312017	0.279826	0.398132	0.89411
NRCAM		Wald ratio	1	-0.182622	-0.606951	0.241708	0.216495	0.398928	0.89411
MVD		Wald ratio	1	0.249436	-0.330519	0.829391	0.295895	0.399235	0.89411
ADH6		IVW	3	0.0637819	-0.0848394	0.212403	0.0758272	0.400265	0.996593
RPE		Wald ratio	1	-0.146631	-0.488402	0.195139	0.174373	0.400399	0.89411
GM2A		IVW	3	0.0643967	-0.0859759	0.214769	0.0767207	0.401264	0.996593
PAWR		Wald ratio	1	0.243902	-0.325772	0.813577	0.29065	0.401379	0.89411
CHGB		Wald ratio	1	-0.426384	-1.42242	0.569648	0.50818	0.401446	0.89411
PPA2		Wald ratio	1	-0.12334	-0.411575	0.164896	0.147059	0.401632	0.89411
SERPINA12		IVW	6	-0.0209499	-0.0699692	0.0280693	0.0250098	0.402218	0.996593
HSPA13		Wald ratio	1	-0.116496	-0.390494	0.157502	0.139795	0.404657	0.896793
IGFALS		IVW	4	0.0664269	-0.0906605	0.223514	0.0801466	0.407208	0.996593
TREM1		IVW	4	0.0410071	-0.0561828	0.138197	0.0495867	0.408249	0.996593
S100A2		IVW	2	-0.11426	-0.386794	0.158274	0.139048	0.41123	0.996593
MSR1		IVW	5	0.0283679	-0.0393923	0.0961282	0.0345715	0.411898	0.996593
EPHB2		IVW	3	0.106206	-0.14785	0.360261	0.12962	0.41258	0.996593
FOXO3		Wald ratio	1	0.217666	-0.304795	0.740126	0.266562	0.414175	0.896793
CD244		IVW	2	-0.175818	-0.598497	0.24686	0.215652	0.414908	0.996593
CCNH		Wald ratio	1	-0.136033	-0.463718	0.191651	0.167186	0.415837	0.896793
VWA2		IVW	5	0.0515082	-0.0726557	0.175672	0.0633489	0.416168	0.996593
ADAM9		Wald ratio	1	-0.300538	-1.02518	0.424105	0.369716	0.416281	0.896793
PLXND1		IVW	3	-0.0884363	-0.301997	0.125124	0.10896	0.416996	0.996593
UST		IVW	2	-0.119682	-0.409217	0.169853	0.147722	0.417834	0.996593
TPST2		IVW	2	-0.0697475	-0.239072	0.0995776	0.0863903	0.419463	0.996593
CCM2		Wald ratio	1	-0.176955	-0.607133	0.253224	0.219479	0.420099	0.896793
ENTPD1		IVW	2	0.132796	-0.190287	0.455879	0.164838	0.420467	0.996593
ENDOU		Wald ratio	1	-0.172932	-0.594406	0.248541	0.215038	0.421284	0.896793
GALNT13		Wald ratio	1	0.176471	-0.253961	0.606902	0.219608	0.421645	0.896793
GPC6		Wald ratio	1	0.196375	-0.283263	0.676012	0.244713	0.422282	0.896793
TMEM132C		IVW	5	0.0326945	-0.0472186	0.112608	0.040772	0.422619	0.996593
GPC1		IVW	6	-0.0318151	-0.11007	0.0464397	0.0399259	0.425537	0.996593
NTN4		IVW	3	-0.0524921	-0.181898	0.0769143	0.0660237	0.426585	0.996593
TFRC		Wald ratio	1	0.147175	-0.215979	0.510329	0.185283	0.427006	0.896793
CRYBB1		Wald ratio	1	-0.0596065	-0.20706	0.0878472	0.0752315	0.428181	0.896793
CROT		IVW	4	-0.0511057	-0.177559	0.0753475	0.0645169	0.428286	0.996593
GLB1		Wald ratio	1	-0.239374	-0.835705	0.356957	0.304251	0.43142	0.896793
FBP1		IVW	2	0.14035	-0.209818	0.490517	0.178657	0.432112	0.996593
MAPKAPK2		Wald ratio	1	-0.0638058	-0.223173	0.0955618	0.08131	0.432616	0.896793
CTRB1		IVW	2	0.0351535	-0.0527026	0.12301	0.0448245	0.432896	0.996593
SLAMF7		IVW	8	-0.028892	-0.101168	0.0433842	0.0368756	0.433334	0.996593
IL1RAP		IVW	5	0.0179689	-0.0270095	0.0629472	0.0229481	0.433615	0.996593
TTL		Wald ratio	1	0.201743	-0.303512	0.706999	0.257783	0.433857	0.896793
GRAP		Wald ratio	1	1.87821	-2.82798	6.5844	2.40112	0.434083	0.896793
DUT		Wald ratio	1	0.180025	-0.271911	0.631961	0.23058	0.43495	0.896793
HSF1		Wald ratio	1	-0.209703	-0.737277	0.317872	0.269171	0.435939	0.896793
APOC3		IVW	3	-0.100718	-0.354861	0.153425	0.129665	0.437303	0.996593
FOLH1		IVW	2	0.0604128	-0.092055	0.212881	0.0777897	0.437385	0.996593
ALDH3A1		Wald ratio	1	-0.0844515	-0.297932	0.129029	0.108919	0.438126	0.896793
AZGP1		IVW	2	-0.0819802	-0.289277	0.125316	0.105763	0.438264	0.996593
WIF1		Wald ratio	1	0.169521	-0.260068	0.59911	0.219178	0.439264	0.896793
ACAN		IVW	2	0.0785601	-0.120576	0.277696	0.1016	0.439387	0.996593
LIPN		IVW	5	-0.039169	-0.138477	0.0601392	0.0506675	0.439487	0.996593
PLCG2		IVW	2	0.129166	-0.198681	0.457013	0.167269	0.439994	0.996593
LINGO1		IVW	2	-0.13435	-0.475881	0.207181	0.174251	0.440696	0.996593
AASDHPPT		Wald ratio	1	-0.227891	-0.807891	0.352109	0.295918	0.441232	0.896793
DNAJB4		IVW	2	0.062415	-0.0966868	0.221517	0.0811744	0.441952	0.996593
CFHR1		IVW	6	0.0202345	-0.0313976	0.0718667	0.0263429	0.442416	0.996593
MGAT2		Wald ratio	1	-0.0748092	-0.266321	0.116702	0.0977099	0.443899	0.896793
RMDN1		IVW	4	-0.041149	-0.147015	0.0647174	0.0540134	0.446162	0.996593
AGFG1		Wald ratio	1	0.111917	-0.176497	0.400332	0.14715	0.446918	0.896793
PIP4K2A		Wald ratio	1	0.0890851	-0.140578	0.318748	0.117175	0.447091	0.896793
PYY		Wald ratio	1	-0.173533	-0.621323	0.274257	0.228464	0.447516	0.896793
PIK3CG		Wald ratio	1	0.208678	-0.329917	0.747273	0.274793	0.447614	0.896793
KRT1		IVW	2	0.157159	-0.248492	0.56281	0.206965	0.447644	0.996593
MMP7		IVW	3	-0.0318872	-0.114373	0.0505991	0.0420848	0.448637	0.996593
RPS6KA1		Wald ratio	1	-0.104822	-0.376017	0.166373	0.138365	0.448705	0.896793
ICAM4		Wald ratio	1	-0.0967136	-0.347005	0.153577	0.1277	0.448838	0.896793
RRAS2		Wald ratio	1	-0.353568	-1.2692	0.562064	0.46716	0.449141	0.896793
FN1		Wald ratio	1	0.070396	-0.11193	0.252722	0.0930233	0.449196	0.896793
FN1		Wald ratio	1	0.0636364	-0.101182	0.228455	0.0840909	0.449196	0.896793
FCGR3B		IVW	2	0.0808934	-0.130278	0.292065	0.107741	0.452763	0.996593
CD86		Wald ratio	1	0.1793	-0.289271	0.647872	0.239067	0.453255	0.898018
TG		Wald ratio	1	0.194274	-0.314765	0.703313	0.259714	0.454441	0.898018
NME2		Wald ratio	1	-0.0695233	-0.251952	0.112906	0.093076	0.455093	0.898018
LDHB		IVW	2	0.282965	-0.459919	1.02585	0.379022	0.455326	0.996593
GMDS		Wald ratio	1	-0.188119	-0.68297	0.306733	0.252475	0.456212	0.898018
ISG15		IVW	4	-0.0330555	-0.120203	0.0540916	0.0444628	0.457215	0.996593
NPTXR		IVW	4	-0.0256392	-0.0933563	0.0420779	0.0345495	0.458028	0.996593
MARK3		Wald ratio	1	1.77143	-2.90807	6.45093	2.3875	0.458112	0.898604
CD300A		IVW	6	0.0201461	-0.0333573	0.0736495	0.0272976	0.460505	0.996593
SUB1		Wald ratio	1	0.214067	-0.358349	0.786483	0.292049	0.463568	0.900265
PDGFRA		IVW	3	-0.0772107	-0.284267	0.129845	0.105641	0.464852	0.996593
MDH1		Wald ratio	1	0.178808	-0.301457	0.659073	0.245033	0.465555	0.900265
ENPP7		IVW	7	-0.0326352	-0.120438	0.0551679	0.0447975	0.466305	0.996593
MATN2		IVW	4	-0.074341	-0.274586	0.125904	0.102166	0.466827	0.996593
FUT10		IVW	8	0.0259415	-0.0439727	0.0958557	0.0356705	0.467071	0.996593
C1QTNF9		Wald ratio	1	0.0492823	-0.0838852	0.18245	0.0679426	0.468236	0.900265
ANGPTL1		IVW	2	0.108967	-0.1875	0.405433	0.151258	0.471278	0.996593
ATOX1		Wald ratio	1	0.223201	-0.384082	0.830485	0.309838	0.471292	0.900265
GZMB		Wald ratio	1	-0.106516	-0.396341	0.183308	0.14787	0.471316	0.900265
FUT3		IVW	9	-0.0270704	-0.100867	0.0467257	0.0376511	0.472153	0.996593
ECH1		IVW	2	-0.0333914	-0.124729	0.0579464	0.0466009	0.473658	0.996593
CCL25		IVW	6	0.0220185	-0.038222	0.0822589	0.0307349	0.473744	0.996593
CRYGD		Wald ratio	1	0.0866953	-0.150524	0.323914	0.12103	0.473799	0.900265
HINT1		Wald ratio	1	-0.113402	-0.424577	0.197773	0.158763	0.475051	0.900265
C9		IVW	5	-0.049935	-0.187045	0.087175	0.0699541	0.475335	0.996593
C1R		IVW	2	-0.153878	-0.577181	0.269424	0.215971	0.476157	0.996593
NUDT1		Wald ratio	1	-0.112456	-0.421985	0.197073	0.157923	0.476406	0.900265
PGLS		IVW	3	-0.205501	-0.771383	0.360382	0.288716	0.476604	0.996593
MMP12		IVW	6	0.0251614	-0.0442179	0.0945408	0.0353976	0.477194	0.996593
GAS6		IVW	5	-0.0497317	-0.186911	0.0874472	0.0699892	0.477355	0.996593
GSTP1		IVW	2	-0.0713753	-0.268321	0.12557	0.100482	0.477502	0.996593
FN1		Wald ratio	1	-0.066879	-0.251643	0.117885	0.0942675	0.478039	0.900265
SIGLEC12		IVW	8	-0.020678	-0.0779121	0.036556	0.0292011	0.478867	0.996593
CETN3		Wald ratio	1	-0.170025	-0.641511	0.301461	0.240554	0.479687	0.900265
FSTL4		IVW	2	0.122125	-0.217103	0.461352	0.173075	0.480426	0.996593
PLXNA4		Wald ratio	1	-0.148445	-0.561284	0.264393	0.210632	0.480958	0.900265
CYB5D2		IVW	2	0.0984756	-0.175936	0.372887	0.140006	0.481827	0.996593
BDNF		IVW	2	0.142496	-0.254795	0.539787	0.2027	0.482062	0.996593
SPINK4		IVW	2	0.0442163	-0.0791268	0.167559	0.0629302	0.482289	0.996593
CA12		Wald ratio	1	0.202454	-0.362699	0.767607	0.288344	0.4826	0.900265
ABO		IVW	9	0.0166206	-0.0298888	0.06313	0.0237293	0.483661	0.996593
C6		IVW	2	-0.0495913	-0.188437	0.0892545	0.0708397	0.483896	0.996593
METAP1		Wald ratio	1	0.141985	-0.256	0.539969	0.203053	0.484397	0.900265
SPATA20		IVW	4	0.0360921	-0.0652915	0.137476	0.0517263	0.485333	0.996593
CHI3L2		Wald ratio	1	-0.157093	-0.600563	0.286377	0.22626	0.487494	0.900265
FSTL3		IVW	2	-0.25006	-0.957436	0.457316	0.360906	0.488393	0.996593
ARPC1B		Wald ratio	1	-0.109329	-0.418853	0.200194	0.15792	0.488744	0.900265
PLAT		IVW	4	-0.0473308	-0.181436	0.086775	0.0684213	0.489091	0.996593
MMP10		IVW	7	-0.0304653	-0.116811	0.0558804	0.0440539	0.489222	0.996593
PAK4		Wald ratio	1	0.20339	-0.373814	0.780593	0.294492	0.489787	0.900265
PELO		Wald ratio	1	-0.211392	-0.811797	0.389013	0.306329	0.490142	0.900265
LILRA2		IVW	8	-0.0249037	-0.0956403	0.0458329	0.0360901	0.490167	0.996593
VTA1		Wald ratio	1	-0.179435	-0.689194	0.330323	0.260081	0.490243	0.900265
CPB1		IVW	2	-0.052305	-0.20105	0.0964398	0.0758902	0.490685	0.996593
TCN2		IVW	6	0.0190678	-0.0353142	0.0734499	0.0277459	0.491939	0.996593
IDI1		Wald ratio	1	-0.140301	-0.540791	0.260188	0.204331	0.492312	0.900265
NPW		IVW	6	0.0951444	-0.176635	0.366924	0.138663	0.492615	0.996593
CCL28		Wald ratio	1	-0.214156	-0.825989	0.397677	0.31216	0.492684	0.900265
PIP		IVW	5	-0.0273898	-0.105693	0.0509139	0.0399509	0.492974	0.996593
PTEN		Wald ratio	1	0.218236	-0.4058	0.842272	0.318386	0.493063	0.900265
NDE1		Wald ratio	1	-0.13723	-0.530724	0.256264	0.200762	0.494263	0.900265
EPHA1		IVW	6	0.0170001	-0.0318205	0.0658207	0.0249085	0.494921	0.996593
PREP		IVW	2	-0.0573716	-0.222626	0.107882	0.0843133	0.496215	0.996593
TNC		IVW	12	0.0198898	-0.0374046	0.0771842	0.0292318	0.496241	0.996593
PKP2		IVW	2	-0.0968212	-0.375752	0.18211	0.142312	0.496286	0.996593
PLXNB2		IVW	5	0.0255727	-0.0481452	0.0992906	0.0376112	0.496553	0.996593
B3GAT3		IVW	3	-0.146495	-0.569262	0.276273	0.215698	0.497032	0.996593
HYAL1		IVW	2	0.0739642	-0.139704	0.287632	0.109014	0.497466	0.996593
MTHFSD		IVW	4	0.0645962	-0.12248	0.251672	0.0954471	0.498549	0.996593
MATN4		IVW	4	0.038357	-0.0727399	0.149454	0.0566821	0.498594	0.996593
CYTL1		IVW	4	0.026034	-0.0494268	0.101495	0.0385005	0.498913	0.996593
PLOD3		IVW	4	0.10496	-0.199354	0.409275	0.155263	0.499029	0.996593
PFKM		Wald ratio	1	-0.055773	-0.217828	0.106282	0.082681	0.499958	0.907235
SDF2L1		IVW	2	0.179012	-0.341991	0.700016	0.265818	0.500667	0.996593
PTPRJ		IVW	2	-0.106645	-0.417211	0.203921	0.158452	0.50092	0.996593
CPM		IVW	2	0.0721122	-0.137897	0.282121	0.107148	0.500936	0.996593
KRT5		IVW	2	0.0758158	-0.145083	0.296715	0.112704	0.501138	0.996593
LZIC		Wald ratio	1	-0.251188	-0.984442	0.482067	0.374109	0.501948	0.907235
PDE4A		IVW	5	-0.0613291	-0.240442	0.117784	0.0913841	0.502148	0.996593
LGMN		IVW	3	-0.0515893	-0.202289	0.0991106	0.0768877	0.50224	0.996593
TYRO3		Wald ratio	1	-0.114525	-0.450317	0.221266	0.171322	0.503828	0.907235
HAGH		IVW	2	-0.0866802	-0.341119	0.167759	0.129816	0.504315	0.996593
INHBC		IVW	10	-0.0150938	-0.0594433	0.0292556	0.0226273	0.504732	0.996593
MAPK13		Wald ratio	1	-0.083045	-0.327197	0.161107	0.124567	0.504985	0.907235
CD274		IVW	2	-0.0518788	-0.204429	0.100672	0.0778318	0.505059	0.996593
CAPG		IVW	4	-0.0268108	-0.105739	0.0521171	0.0402693	0.505548	0.996593
SAA4		IVW	8	0.0152974	-0.029789	0.0603838	0.0230033	0.506044	0.996593
ITPKA		Wald ratio	1	0.166434	-0.324252	0.657119	0.25035	0.506176	0.907235
THBS1		Wald ratio	1	-0.182274	-0.723077	0.358528	0.27592	0.508865	0.908683
CXCL9		Wald ratio	1	0.130667	-0.25872	0.520053	0.198667	0.510719	0.908683
MTHFS		IVW	7	0.0502259	-0.0995162	0.199968	0.076399	0.510914	0.996593
SIGLEC7		IVW	3	-0.0557003	-0.222281	0.11088	0.0849901	0.512227	0.996593
SH3BGRL2		Wald ratio	1	-0.0843965	-0.338292	0.1695	0.129539	0.514714	0.908683
EVA1C		Wald ratio	1	-0.123919	-0.496715	0.248876	0.190202	0.514714	0.908683
C7		IVW	6	-0.0169062	-0.0678327	0.0340204	0.0259829	0.515263	0.996593
GNPNAT1		Wald ratio	1	-0.138651	-0.557455	0.280152	0.213675	0.51641	0.908683
TRIO		Wald ratio	1	0.189066	-0.382415	0.760547	0.291572	0.516702	0.908683
ACYP2		IVW	2	0.30248	-0.6131	1.21806	0.467132	0.517293	0.996593
SERPIND1		Wald ratio	1	-0.169643	-0.687143	0.347857	0.264031	0.520541	0.91139
ALB		Wald ratio	1	-0.927342	-3.76268	1.90799	1.4466	0.52149	0.91139
FKBP7		IVW	3	-0.0334985	-0.136067	0.0690696	0.0523306	0.522087	0.996593
NCAM1		IVW	3	-0.0370021	-0.150752	0.0767476	0.0580355	0.52375	0.996593
FAS		IVW	3	-0.0329993	-0.134815	0.0688169	0.051947	0.525266	0.996593
MMP19		IVW	3	-0.0685363	-0.280405	0.143332	0.108096	0.52606	0.996593
TREML2		IVW	8	-0.0235458	-0.096397	0.0493054	0.037169	0.526421	0.996593
FSTL1		Wald ratio	1	0.0749834	-0.157823	0.30779	0.118779	0.527854	0.916814
ROR2		IVW	3	0.048878	-0.103009	0.200765	0.0774935	0.528213	0.996593
CHST4		Wald ratio	1	0.105012	-0.222434	0.432458	0.167064	0.52963	0.916814
GMPR		IVW	7	0.0137899	-0.0293267	0.0569064	0.0219982	0.530749	0.996593
TEC		Wald ratio	1	0.0760073	-0.162711	0.314725	0.121795	0.532588	0.916814
ULK3		Wald ratio	1	0.104718	-0.22458	0.434016	0.168009	0.533095	0.916814
ACADM		Wald ratio	1	-0.0381375	-0.158084	0.0818093	0.0611973	0.533161	0.916814
CLEC11A		IVW	4	-0.0266123	-0.110346	0.0571212	0.0427212	0.53333	0.996593
GP5		IVW	2	0.0747059	-0.160733	0.310145	0.120122	0.533996	0.996593
FKBP1B		IVW	2	0.036468	-0.0784641	0.1514	0.0586388	0.534002	0.996593
SORD		IVW	4	0.0800988	-0.173401	0.333599	0.129337	0.535715	0.996593
ARF4		IVW	2	-0.0846927	-0.35329	0.183905	0.13704	0.536565	0.996593
IGSF8		IVW	2	0.0830078	-0.181019	0.347035	0.134708	0.537758	0.996593
C1QTNF3		IVW	2	-0.0622569	-0.260632	0.136118	0.101212	0.538479	0.996593
PI3		IVW	3	0.0313764	-0.0690882	0.131841	0.0512574	0.54045	0.996593
SERPINB13		IVW	4	-0.0428859	-0.18043	0.0946585	0.0701757	0.541119	0.996593
CD200R1		Wald ratio	1	-0.0720486	-0.303438	0.15934	0.118056	0.541667	0.916814
FGF2		IVW	3	0.0390815	-0.0864586	0.164622	0.064051	0.541755	0.996593
FAM172A		Wald ratio	1	-0.121901	-0.514711	0.270909	0.200413	0.543023	0.916814
TALDO1		IVW	3	-0.0904985	-0.38314	0.202143	0.149307	0.544432	0.996593
ARSK		Wald ratio	1	-0.102512	-0.436043	0.23102	0.170169	0.546901	0.916814
ANTXR1		Wald ratio	1	-0.2173	-0.924388	0.489789	0.360759	0.546948	0.916814
DNAJC30		Wald ratio	1	0.0602444	-0.135811	0.2563	0.100028	0.546993	0.916814
KNG1		IVW	5	-0.0223424	-0.0955782	0.0508933	0.0373652	0.549875	0.996593
NRP1		IVW	5	-0.0244921	-0.104775	0.0557906	0.0409605	0.549878	0.996593
SPHK1		Wald ratio	1	-0.182119	-0.779205	0.414967	0.304636	0.549956	0.916814
USP8		Wald ratio	1	0.102262	-0.233078	0.437601	0.171091	0.550039	0.916814
TBCE		IVW	2	-0.0712238	-0.304865	0.162418	0.119205	0.55018	0.996593
SERPINH1		IVW	2	0.0801636	-0.183125	0.343453	0.134331	0.550667	0.996593
F5		IVW	2	-0.0342222	-0.146672	0.0782278	0.0573724	0.550847	0.996593
DKK3		IVW	4	-0.0516013	-0.221242	0.118039	0.0865514	0.551046	0.996593
NLGN2		Wald ratio	1	0.19558	-0.447646	0.838807	0.328177	0.551202	0.916814
MAX		Wald ratio	1	-0.0451505	-0.193735	0.103434	0.0758082	0.55145	0.916814
ITGA2		Wald ratio	1	-0.0872845	-0.374526	0.199957	0.146552	0.55145	0.916814
BDNF		Wald ratio	1	0.155332	-0.356631	0.667295	0.261206	0.552061	0.916814
SCGN		IVW	2	0.146625	-0.336798	0.630049	0.246645	0.552191	0.996593
AP2A2		Wald ratio	1	-0.132472	-0.569435	0.304491	0.22294	0.552376	0.916814
CPN2		IVW	8	-0.0319981	-0.137555	0.0735592	0.0538558	0.552415	0.996593
AMY2B		IVW	10	0.0230855	-0.0531334	0.0993044	0.0388872	0.552744	0.996593
CCL5		IVW	3	0.0388178	-0.0895909	0.167227	0.0655147	0.553512	0.996593
ERLEC1		Wald ratio	1	-0.0967099	-0.417188	0.223769	0.163509	0.55421	0.917144
ANXA4		IVW	2	-0.031656	-0.136907	0.0735947	0.0536994	0.555523	0.996593
GZMK		IVW	2	0.0548575	-0.127954	0.237669	0.0932714	0.556432	0.996593
NPPA		Wald ratio	1	-0.128637	-0.557856	0.300582	0.218989	0.556927	0.918929
IL5RA		IVW	6	-0.0223147	-0.0971879	0.0525585	0.0382006	0.559122	0.996593
EDIL3		IVW	2	-0.146709	-0.639409	0.345991	0.251378	0.559476	0.996593
LYPLAL1		Wald ratio	1	-0.0783255	-0.341688	0.185037	0.134369	0.559951	0.919613
IGFBP4		Wald ratio	1	-0.185252	-0.809209	0.438705	0.318345	0.56062	0.919613
HSD17B14		IVW	2	-0.0891272	-0.389699	0.211445	0.153353	0.561112	0.996593
SPINT2		IVW	8	0.0207235	-0.0493933	0.0908402	0.0357739	0.562393	0.996593
POMGNT2		IVW	4	0.0693105	-0.16672	0.305341	0.120424	0.564915	0.996593
LGALS9		Wald ratio	1	-0.519737	-2.29205	1.25257	0.90424	0.565442	0.922294
NAP1L4		Wald ratio	1	0.0513113	-0.124128	0.22675	0.0895097	0.566477	0.922294
ATRN		IVW	6	0.0181467	-0.0439356	0.0802289	0.0316746	0.566706	0.996593
CDH17		IVW	5	-0.0304117	-0.134457	0.0736332	0.0530841	0.566715	0.996593
IFNGR1		IVW	2	-0.116194	-0.514882	0.282493	0.203412	0.567846	0.996593
VWA1		IVW	7	-0.0416092	-0.184617	0.101399	0.0729631	0.56849	0.996593
APOA1		IVW	4	-0.0738472	-0.327757	0.180063	0.129546	0.568646	0.996593
GZMM		IVW	2	0.504078	-1.22958	2.23773	0.884517	0.568752	0.996593
S100A6		IVW	4	0.0763798	-0.186664	0.339423	0.134206	0.569272	0.996593
TNFRSF1A		Wald ratio	1	0.0656814	-0.160525	0.291888	0.115412	0.569284	0.922294
PPIL1		IVW	8	0.0231567	-0.0566515	0.102965	0.0407185	0.569558	0.996593
GAPDH		Wald ratio	1	0.144981	-0.355341	0.645304	0.255266	0.570061	0.922294
DNAJB1		Wald ratio	1	-0.145315	-0.647495	0.356864	0.256214	0.570603	0.922294
STX8		Wald ratio	1	0.127753	-0.315477	0.570984	0.226138	0.572118	0.922294
LRP10		IVW	3	-0.141357	-0.631805	0.34909	0.250229	0.572133	0.996593
OXT		IVW	5	0.0437955	-0.108515	0.196106	0.0777097	0.573041	0.996593
SIGLEC9		IVW	6	-0.0141523	-0.0634066	0.035102	0.0251298	0.57332	0.996593
CD46		IVW	2	-0.0409869	-0.183699	0.101725	0.0728124	0.573495	0.996593
FGG		Wald ratio	1	-0.0537634	-0.241222	0.133696	0.0956423	0.574027	0.92272
GRAMD1C		IVW	8	-0.0236784	-0.106307	0.0589505	0.0421576	0.574344	0.996593
KLK10		IVW	10	-0.0169924	-0.0763036	0.0423188	0.0302608	0.574435	0.996593
FBP2		IVW	2	-0.04898	-0.221176	0.123216	0.0878552	0.57718	0.996593
IDI2		IVW	2	0.0761745	-0.192141	0.34449	0.136895	0.577908	0.996593
POLM		IVW	3	-0.0525504	-0.238359	0.133258	0.0948001	0.579354	0.996593
ASL		IVW	2	0.0969112	-0.245836	0.439658	0.174871	0.579451	0.996593
DSG2		IVW	5	0.031944	-0.0811975	0.145086	0.0577253	0.580003	0.996593
PDK1		IVW	2	0.140468	-0.360541	0.641476	0.255616	0.582645	0.996593
IL12B		IVW	5	0.0386562	-0.0993722	0.176685	0.0704227	0.583062	0.996593
GUSB		IVW	2	0.0909379	-0.233961	0.415837	0.165765	0.583283	0.996593
NME4		IVW	2	0.133485	-0.344148	0.611117	0.24369	0.583853	0.996593
CD55		IVW	5	-0.0204463	-0.0936903	0.0527976	0.0373694	0.584282	0.996593
RHOC		Wald ratio	1	0.0711423	-0.184168	0.326453	0.130261	0.58496	0.932041
VASN		Wald ratio	1	-0.158629	-0.728223	0.410964	0.290609	0.585168	0.932041
PPP1R14A		IVW	2	0.0388507	-0.100882	0.178583	0.071292	0.585787	0.996593
CCL18		IVW	7	-0.0172506	-0.0793669	0.0448657	0.031692	0.586221	0.996593
IFIT3		Wald ratio	1	0.0884956	-0.230221	0.407212	0.162611	0.586292	0.932041
TLL1		Wald ratio	1	-0.168942	-0.777679	0.439795	0.31058	0.586472	0.932041
CMPK1		Wald ratio	1	0.0977218	-0.258321	0.453765	0.181655	0.590609	0.933329
IL22		Wald ratio	1	-0.129468	-0.601176	0.34224	0.240667	0.590609	0.933329
FAS		IVW	3	-0.0304285	-0.141565	0.0807076	0.0567021	0.591517	0.996593
CCL8		IVW	9	-0.0142253	-0.0662639	0.0378132	0.0265503	0.592105	0.996593
GGH		IVW	5	-0.0192081	-0.089753	0.0513368	0.0359923	0.593568	0.996593
MGAT4B		IVW	4	-0.0301079	-0.140837	0.0806206	0.0564942	0.594076	0.996593
FLII		Wald ratio	1	0.0829346	-0.222632	0.388501	0.155901	0.594747	0.937228
CNTNAP2		IVW	6	0.0245025	-0.0663125	0.115317	0.0463342	0.59693	0.996593
TRIM3		IVW	2	-0.12276	-0.578768	0.333248	0.232657	0.597747	0.996593
GFRAL		IVW	3	0.035173	-0.0958549	0.166201	0.066851	0.598791	0.996593
OGN		IVW	4	0.0292293	-0.0801023	0.138561	0.0557814	0.600281	0.996593
ALDH1A1		Wald ratio	1	-0.0743961	-0.352773	0.203981	0.142029	0.600411	0.941454
CINP		Wald ratio	1	0.12963	-0.36037	0.61963	0.25	0.604097	0.941454
MFAP2		IVW	2	0.197718	-0.550304	0.94574	0.381644	0.60441	0.996593
RNASE2		Wald ratio	1	0.0635919	-0.17747	0.304654	0.122991	0.605124	0.941454
CTSS		IVW	4	0.0297556	-0.0834065	0.142918	0.0577358	0.606291	0.996593
SAT2		IVW	4	-0.0309878	-0.148914	0.086938	0.0601662	0.606527	0.996593
IL15RA		Wald ratio	1	0.125912	-0.353358	0.605182	0.244526	0.606605	0.941454
NOTCH1		IVW	2	0.0914997	-0.256813	0.439812	0.17771	0.606636	0.996593
RALB		Wald ratio	1	0.0303661	-0.0854077	0.14614	0.0590682	0.607193	0.941454
CPLX1		Wald ratio	1	0.153169	-0.433451	0.739789	0.299296	0.608816	0.941454
ALDH3B1		Wald ratio	1	-0.0585185	-0.283556	0.166519	0.114815	0.610277	0.941454
PPIC		IVW	3	-0.0188086	-0.0912068	0.0535896	0.0369379	0.610615	0.996593
SCUBE3		IVW	2	-0.0351043	-0.17054	0.100331	0.0690996	0.611436	0.996593
AIF1L		IVW	5	-0.0208664	-0.101461	0.0597284	0.0411198	0.611836	0.996593
IGFBP6		Wald ratio	1	-0.167304	-0.817514	0.482906	0.33174	0.614035	0.941454
PSAP		IVW	3	-0.0225044	-0.110133	0.065124	0.0447084	0.614711	0.996593
CD68		IVW	2	-0.135088	-0.661438	0.391261	0.268546	0.614939	0.996593
PLTP		IVW	5	-0.0258582	-0.126724	0.0750076	0.0514621	0.615337	0.996593
ACOT13		IVW	2	-0.103333	-0.507989	0.301324	0.206457	0.616721	0.996593
FAM171B		IVW	2	0.124538	-0.363831	0.612906	0.249168	0.617205	0.996593
PKDCC		IVW	2	0.083769	-0.245146	0.412684	0.167814	0.617654	0.996593
TSTD1		IVW	5	-0.0190716	-0.0940831	0.0559398	0.0382711	0.618252	0.996593
PDLIM4		Wald ratio	1	0.0421012	-0.123693	0.207895	0.0845886	0.618684	0.941454
XRCC4		Wald ratio	1	0.0676203	-0.198726	0.333966	0.135891	0.618761	0.941454
APOA5		IVW	8	-0.0172849	-0.085423	0.0508532	0.0347643	0.619046	0.996593
GLCE		IVW	7	0.0190315	-0.0559938	0.0940567	0.0382782	0.619056	0.996593
CCDC80		IVW	2	-0.0898785	-0.444346	0.264589	0.180851	0.619205	0.996593
AOC2		IVW	2	0.0871922	-0.258365	0.43275	0.176305	0.620915	0.996593
PRKCSH		Wald ratio	1	-0.0706714	-0.351166	0.209823	0.14311	0.621428	0.941454
PPP1R1A		Wald ratio	1	0.160494	-0.477716	0.798704	0.325617	0.62209	0.941454
GP1BA		IVW	4	-0.042175	-0.210035	0.125685	0.085643	0.622401	0.996593
NCF1		IVW	5	-0.06778	-0.339765	0.204205	0.138768	0.625237	0.996593
NID1		IVW	4	-0.0531138	-0.266391	0.160163	0.108815	0.62547	0.996593
APOF		IVW	4	-0.0629622	-0.316065	0.190141	0.129134	0.625853	0.996593
GNRH2		IVW	2	-0.0680187	-0.341945	0.205907	0.139758	0.626479	0.996593
MAPRE1		Wald ratio	1	-0.100149	-0.504454	0.304155	0.206278	0.627317	0.941454
FRZB		IVW	6	-0.0137874	-0.0695041	0.0419293	0.0284269	0.627668	0.996593
LAP3		IVW	3	-0.0898795	-0.454959	0.2752	0.186265	0.629426	0.996593
HPCAL1		Wald ratio	1	0.568966	-1.74345	2.88138	1.1798	0.629625	0.941454
GSTM4		IVW	13	-0.0163797	-0.0829772	0.0502178	0.0339783	0.629761	0.996593
PLA2R1		IVW	12	0.0128915	-0.0397608	0.0655438	0.0268634	0.631304	0.996593
KNG1		IVW	2	-0.0252286	-0.128821	0.0783641	0.0528534	0.633126	0.996593
KLRB1		IVW	2	-0.149954	-0.766109	0.466201	0.314365	0.633358	0.996593
ADIPOQ		IVW	5	-0.0406693	-0.208154	0.126815	0.0854513	0.634121	0.996593
NPTX1		IVW	7	-0.0291947	-0.149618	0.0912284	0.0614403	0.634665	0.996593
AKR7A2		Wald ratio	1	-0.0422721	-0.217041	0.132497	0.0891678	0.635447	0.941454
PTPN7		Wald ratio	1	-0.189751	-0.977008	0.597507	0.401662	0.636631	0.941454
SAR1A		IVW	2	0.0467631	-0.147835	0.241361	0.0992848	0.637641	0.996593
KLK7		IVW	3	0.0568181	-0.179737	0.293374	0.120692	0.637804	0.996593
HHIP		IVW	2	0.0809575	-0.256178	0.418093	0.172008	0.637882	0.996593
CRTAM		IVW	6	-0.0248238	-0.128386	0.0787384	0.0528378	0.63849	0.996593
MDK		IVW	2	0.0842697	-0.267535	0.436074	0.179492	0.63872	0.996593
GOLM1		IVW	3	0.0299071	-0.0949899	0.154804	0.0637229	0.638834	0.996593
VEGFA		IVW	2	-0.0254293	-0.131884	0.0810253	0.0543136	0.639646	0.996593
NETO1		IVW	2	0.103537	-0.330582	0.537656	0.221489	0.640172	0.996593
DNAJB14		Wald ratio	1	-0.104887	-0.546412	0.336639	0.225268	0.641496	0.941454
COCH		IVW	3	0.030285	-0.0973158	0.157886	0.0651024	0.641795	0.996593
BIN1		IVW	2	0.0721445	-0.231908	0.376197	0.155129	0.641887	0.996593
GREM2		Wald ratio	1	-0.104252	-0.543841	0.335336	0.22428	0.642052	0.941454
KIRREL2		IVW	5	-0.0257179	-0.134383	0.0829468	0.0554412	0.642736	0.996593
HTRA1		IVW	2	-0.0754469	-0.396859	0.245966	0.163986	0.645458	0.996593
LGR5		Wald ratio	1	0.118741	-0.387382	0.624864	0.258226	0.645636	0.941454
FGL2		Wald ratio	1	-0.110181	-0.580363	0.36	0.239888	0.646017	0.941454
TFF3		Wald ratio	1	0.0927318	-0.303525	0.488989	0.202172	0.646466	0.941454
LRRC4C		IVW	4	0.0759333	-0.250874	0.402741	0.166739	0.648819	0.996593
CTSV		IVW	4	0.0416585	-0.137825	0.221142	0.0915733	0.649167	0.996593
AGRP		IVW	2	-0.0263225	-0.139745	0.0871001	0.0578687	0.649206	0.996593
G3BP1		Wald ratio	1	0.0998553	-0.331288	0.530999	0.219971	0.649867	0.941454
CHIT1		IVW	7	0.0138724	-0.0463756	0.0741205	0.0307388	0.651773	0.996593
ASAH2		IVW	7	0.0154444	-0.0516441	0.0825329	0.0342288	0.651838	0.996593
SEPSECS		Wald ratio	1	-0.0931877	-0.498792	0.312416	0.206941	0.652487	0.941454
WFDC2		Wald ratio	1	0.0988806	-0.332612	0.530373	0.220149	0.653322	0.941454
ANGPT2		IVW	3	-0.0700186	-0.376085	0.236048	0.156156	0.653873	0.996593
KDR		IVW	2	-0.0165272	-0.0889239	0.0558695	0.0369371	0.654556	0.996593
RFK		IVW	2	0.0466997	-0.157965	0.251364	0.104421	0.654711	0.996593
RAB21		Wald ratio	1	0.0818265	-0.277377	0.44103	0.183267	0.655245	0.941454
RCAN1		Wald ratio	1	-0.0974265	-0.525276	0.330423	0.21829	0.655369	0.941454
DOC2B		Wald ratio	1	-0.185897	-1.00256	0.630769	0.416667	0.655486	0.941454
IFI16		Wald ratio	1	-0.112409	-0.607416	0.382599	0.252555	0.656257	0.941454
PTGR1		IVW	7	0.0224095	-0.0769989	0.121818	0.0507185	0.658605	0.996593
TNFSF8		IVW	2	0.0395187	-0.136345	0.215382	0.0897264	0.659622	0.996593
ARFIP1		IVW	2	0.0264789	-0.0913575	0.144315	0.0601206	0.659626	0.996593
SCARF2		Wald ratio	1	0.0469152	-0.162185	0.256015	0.106684	0.660112	0.941454
SULT2A1		IVW	2	-0.0718824	-0.39274	0.248975	0.163703	0.660587	0.996593
MPG		Wald ratio	1	0.339858	-1.17722	1.85694	0.774021	0.660603	0.941454
PRSS1		Wald ratio	1	0.158669	-0.5513	0.868638	0.362229	0.661362	0.941454
CKMT2		Wald ratio	1	0.123888	-0.432732	0.680508	0.28399	0.662661	0.941454
CXCL1		IVW	9	0.0254783	-0.0895096	0.140466	0.0586673	0.664081	0.996593
WFDC5		Wald ratio	1	0.140171	-0.49306	0.773402	0.323077	0.664388	0.941454
IFNL3		Wald ratio	1	-0.121667	-0.673733	0.4304	0.281667	0.665776	0.941454
ADAMTS13		IVW	10	-0.0112629	-0.062406	0.0398803	0.0260934	0.666006	0.996593
FGF23		Wald ratio	1	0.122093	-0.432481	0.676667	0.282946	0.6661	0.941454
GPD1		Wald ratio	1	0.0809687	-0.28725	0.449188	0.187867	0.666476	0.941454
IDO1		Wald ratio	1	-0.105983	-0.588444	0.376479	0.246154	0.666792	0.941454
PMM2		IVW	4	-0.0362396	-0.201571	0.129092	0.0843529	0.667473	0.996593
APOC1		IVW	3	0.0713268	-0.255182	0.397835	0.166586	0.668529	0.996593
ECM1		IVW	5	-0.0218607	-0.122004	0.0782826	0.0510935	0.668755	0.996593
HMBS		Wald ratio	1	0.11976	-0.431856	0.671377	0.281437	0.670449	0.941454
CX3CL1		Wald ratio	1	-0.0995444	-0.558222	0.359133	0.234019	0.670568	0.941454
MUSK		Wald ratio	1	-0.0856269	-0.481223	0.309969	0.201835	0.671389	0.941454
COLEC10		Wald ratio	1	0.148754	-0.539289	0.836796	0.351042	0.671749	0.941454
FOLR2		IVW	2	-0.0648529	-0.365849	0.236143	0.153569	0.672803	0.996593
HEXIM1		Wald ratio	1	0.096	-0.34976	0.54176	0.227429	0.672944	0.941454
ADH1C		Wald ratio	1	-0.0422205	-0.238374	0.153933	0.100078	0.673116	0.941454
ADM2		Wald ratio	1	0.0711409	-0.260349	0.402631	0.169128	0.674022	0.941454
ATF6B		Wald ratio	1	-0.105767	-0.598747	0.387212	0.25152	0.674111	0.941454
DCTPP1		Wald ratio	1	-0.11204	-0.636455	0.412375	0.267559	0.675399	0.941454
GLIPR2		IVW	2	-0.0260494	-0.148012	0.0959134	0.0622259	0.675489	0.996593
SF3B4		Wald ratio	1	0.131129	-0.487936	0.750194	0.315849	0.678023	0.941454
ADAMTSL1		IVW	7	-0.0168356	-0.0963735	0.0627022	0.0405805	0.678237	0.996593
MMP16		Wald ratio	1	-0.110157	-0.634506	0.414192	0.267525	0.680512	0.941454
IL1RL2		IVW	3	-0.0420779	-0.242758	0.158602	0.102388	0.681097	0.996593
IGFBP7		IVW	6	0.0238045	-0.0909535	0.138562	0.05855	0.684326	0.996593
BTC		IVW	2	0.0347572	-0.132821	0.202335	0.0854989	0.684359	0.996593
CRYZ		IVW	5	0.0240272	-0.0923398	0.140394	0.0593709	0.685701	0.996593
FJX1		IVW	4	-0.0256913	-0.150188	0.0988052	0.0635187	0.685868	0.996593
TNFSF14		Wald ratio	1	0.0944206	-0.365436	0.554278	0.234621	0.687361	0.941454
MCEMP1		Wald ratio	1	0.10443	-0.404177	0.613038	0.259494	0.687361	0.941454
ALDH6A1		IVW	2	-0.0680882	-0.400509	0.264332	0.169602	0.688083	0.996593
BMP1		Wald ratio	1	-0.0844907	-0.497361	0.32838	0.210648	0.688347	0.941454
KPNA6		Wald ratio	1	-0.0902507	-0.531387	0.350886	0.22507	0.688427	0.941454
TFF2		IVW	2	-0.0526926	-0.31062	0.205235	0.131596	0.688852	0.996593
RTN4IP1		Wald ratio	1	0.0859917	-0.335368	0.507351	0.214979	0.689157	0.941454
CCL23		IVW	6	0.0126767	-0.0494978	0.0748512	0.0317217	0.689434	0.996593
C3		Wald ratio	1	0.0821256	-0.321237	0.485488	0.205797	0.689848	0.941454
BMP7		Wald ratio	1	-0.0971338	-0.57465	0.380382	0.243631	0.69012	0.941454
IL22RA2		IVW	3	-0.0991701	-0.587626	0.389286	0.249212	0.690679	0.996593
IGFLR1		IVW	4	-0.0125361	-0.0743677	0.0492955	0.0315467	0.691086	0.996593
RRM1		Wald ratio	1	-0.0945455	-0.561382	0.372291	0.238182	0.691407	0.941454
EGFR		IVW	3	0.0379209	-0.149507	0.225349	0.0956267	0.691698	0.996593
ICAM5		IVW	6	0.0145194	-0.057403	0.0864417	0.0366951	0.692344	0.996593
HTATIP2		IVW	8	0.0189052	-0.0755998	0.11341	0.0482168	0.694994	0.996593
RBP7		Wald ratio	1	-0.0749035	-0.451768	0.301961	0.192278	0.696863	0.945704
MAPK9		IVW	2	0.0312506	-0.126343	0.188844	0.0804049	0.697523	0.996593
GLRX		Wald ratio	1	0.0698225	-0.282746	0.422391	0.179882	0.697899	0.945704
SPP1		IVW	2	-0.0385	-0.234134	0.157134	0.0998133	0.699704	0.996593
OVCA2		Wald ratio	1	0.0538613	-0.219941	0.327664	0.139695	0.69982	0.946022
SCO2		Wald ratio	1	-0.0551033	-0.337383	0.227176	0.14402	0.70201	0.946701
SIGLEC5		IVW	10	-0.00706771	-0.043285	0.0291496	0.0184782	0.702099	0.996593
FAM3B		IVW	6	-0.0148743	-0.0917758	0.0620273	0.0392355	0.704612	0.996593
CMBL		Wald ratio	1	1.37481	-5.78175	8.53137	3.65131	0.706527	0.946879
PCDH10		Wald ratio	1	0.0369822	-0.155828	0.229793	0.0983728	0.706962	0.946879
CDKN1B		Wald ratio	1	0.062966	-0.266678	0.39261	0.168186	0.708118	0.946879
SERPINE1		IVW	2	0.169201	-0.717294	1.05569	0.452293	0.708333	0.996593
CHST15		IVW	2	-0.0429421	-0.268826	0.182942	0.115247	0.709439	0.996593
ICAM1		IVW	9	-0.0065065	-0.0408066	0.0277936	0.0175	0.710042	0.996593
RAP1GDS1		Wald ratio	1	0.107407	-0.458815	0.67363	0.288889	0.710046	0.946879
SEMA5A		IVW	9	-0.00564107	-0.0354637	0.0241815	0.0152156	0.710829	0.996593
PNLIPRP1		IVW	2	0.0382437	-0.164506	0.240993	0.103444	0.711602	0.996593
TIGIT		Wald ratio	1	-0.0676329	-0.42744	0.292174	0.183575	0.712559	0.946879
CD300C		IVW	2	0.0440253	-0.191474	0.279524	0.120153	0.714058	0.996593
SPINK1		Wald ratio	1	-0.043248	-0.275057	0.188561	0.11827	0.71461	0.946879
TNFRSF1B		Wald ratio	1	-0.0409199	-0.260981	0.179141	0.112276	0.715516	0.946879
TNFRSF17		Wald ratio	1	0.0379747	-0.166344	0.242293	0.104244	0.715645	0.946879
SERPINF1		IVW	3	0.0174906	-0.0769971	0.111978	0.048208	0.716744	0.996593
GKN2		IVW	4	0.0141408	-0.0623595	0.090641	0.0390307	0.717129	0.996593
IGFBP2		IVW	2	0.133357	-0.588362	0.855076	0.368224	0.717231	0.996593
ZG16B		Wald ratio	1	-0.0276423	-0.177431	0.122146	0.0764228	0.717575	0.947199
ICAM5		IVW	6	0.013122	-0.0581224	0.0843665	0.0363492	0.718101	0.996593
BRSK2		IVW	2	-0.0295253	-0.190317	0.131267	0.0820367	0.718919	0.996593
SHMT1		IVW	6	0.0128535	-0.0571897	0.0828966	0.0357363	0.71909	0.996593
SEMA4C		IVW	3	0.070864	-0.317521	0.459249	0.198156	0.720629	0.996593
CD8A		IVW	3	0.0216276	-0.0969559	0.140211	0.0605018	0.720739	0.996593
CHL1		IVW	5	-0.022757	-0.147922	0.102408	0.0638595	0.72157	0.996593
ACE		IVW	10	0.0109701	-0.0493713	0.0713114	0.0307864	0.721594	0.996593
COL6A3		IVW	2	0.0396736	-0.17892	0.258267	0.111527	0.722043	0.996593
POSTN		IVW	4	-0.0197197	-0.129047	0.0896079	0.0557794	0.723691	0.996593
CHRDL2		IVW	5	0.0278163	-0.126412	0.182045	0.0786881	0.723713	0.996593
PMM1		Wald ratio	1	-0.0943709	-0.620066	0.431325	0.268212	0.724949	0.954687
CA3		IVW	5	-0.0235147	-0.154911	0.107881	0.0670387	0.725766	0.996593
STAMBP		IVW	2	0.145517	-0.673195	0.964229	0.41771	0.727564	0.996593
SPINK5		IVW	2	-0.033055	-0.219326	0.153216	0.0950363	0.727979	0.996593
NID2		IVW	5	0.0156014	-0.072337	0.10354	0.0448665	0.728044	0.996593
C3		Wald ratio	1	0.0549133	-0.254759	0.364586	0.157996	0.72817	0.95511
SYK		Wald ratio	1	-0.0543735	-0.361734	0.252987	0.156816	0.728791	0.95511
FCRLB		IVW	4	-0.0152899	-0.101971	0.0713909	0.0442249	0.729546	0.996593
SPINK2		IVW	4	0.0167328	-0.0782981	0.111764	0.0484851	0.730011	0.996593
ENO3		IVW	4	-0.0169597	-0.113451	0.0795321	0.0492305	0.730474	0.996593
PARVA		IVW	2	-0.0473247	-0.317249	0.2226	0.137717	0.731119	0.996593
CELA2A		Wald ratio	1	0.0513074	-0.243611	0.346226	0.150469	0.733116	0.95511
DCTD		IVW	2	-0.0473749	-0.320329	0.22558	0.139262	0.733718	0.996593
JUND		Wald ratio	1	-0.0771812	-0.52443	0.370067	0.228188	0.735186	0.95511
ARL4D		Wald ratio	1	0.0867159	-0.415941	0.589373	0.256458	0.735266	0.95511
GATM		Wald ratio	1	-0.0276091	-0.187786	0.132568	0.0817228	0.735485	0.95511
CRISPLD2		IVW	6	0.0236808	-0.114957	0.162319	0.0707337	0.737785	0.996593
NQO2		IVW	7	-0.0105127	-0.0721487	0.0511234	0.031447	0.738155	0.996593
CLMP		IVW	2	0.0202331	-0.0986969	0.139163	0.0606786	0.738796	0.996593
ENPP5		IVW	8	-0.0144054	-0.0991015	0.0702908	0.0432123	0.738861	0.996593
F2		IVW	2	0.0382681	-0.187176	0.263712	0.115022	0.73936	0.996593
IL27RA		IVW	10	0.0172691	-0.0845245	0.119063	0.0519355	0.739504	0.996593
PDLIM1		Wald ratio	1	-0.0804249	-0.556297	0.395448	0.242792	0.740456	0.959343
PRSS27		IVW	3	-0.0453043	-0.313579	0.222971	0.136875	0.740652	0.996593
NT5DC3		IVW	3	-0.0224592	-0.155681	0.110763	0.0679704	0.741078	0.996593
PLEK		IVW	2	0.041017	-0.204886	0.28692	0.125461	0.74372	0.996593
SMPDL3A		IVW	3	0.0198457	-0.0997628	0.139454	0.0610247	0.745023	0.996593
IGLON5		IVW	2	0.164784	-0.830719	1.16029	0.507909	0.745609	0.996593
PDHX		IVW	2	-0.0506265	-0.359684	0.258431	0.157682	0.74816	0.996593
IRAK4		Wald ratio	1	0.0565627	-0.288818	0.401943	0.176215	0.74822	0.962845
EGFLAM		IVW	3	-0.0261873	-0.186122	0.133748	0.0815995	0.748267	0.996593
CHKB		IVW	4	0.0469821	-0.241793	0.335757	0.147334	0.749817	0.996593
PYGL		IVW	2	0.036662	-0.188777	0.262101	0.11502	0.74992	0.996593
FCGR2A		IVW	11	-0.00950912	-0.0680438	0.0490256	0.0298646	0.750176	0.996593
IL1RN		IVW	3	-0.018964	-0.135784	0.097856	0.059602	0.750351	0.996593
HSP90B1		IVW	7	-0.0103145	-0.0738764	0.0532474	0.0324295	0.75044	0.996593
DNER		IVW	5	0.0209671	-0.108269	0.150203	0.0659367	0.750493	0.996593
NTRK2		Wald ratio	1	0.0674487	-0.349267	0.484164	0.21261	0.75106	0.962845
SH3BP2		IVW	2	0.0178432	-0.0929099	0.128596	0.0565067	0.752176	0.996593
ALDOC		IVW	2	0.114141	-0.594435	0.822717	0.361518	0.752209	0.996593
CCDC134		IVW	2	0.0368922	-0.192531	0.266316	0.117053	0.752628	0.996593
SLMAP		Wald ratio	1	-0.089172	-0.646794	0.46845	0.284501	0.753952	0.962845
LGALS4		Wald ratio	1	-0.0769231	-0.558649	0.404803	0.245779	0.754298	0.962845
NT5C3A		Wald ratio	1	0.0533808	-0.281423	0.388185	0.170819	0.754661	0.962845
TNFRSF1B		IVW	2	-0.0215724	-0.15724	0.114095	0.0692181	0.7553	0.996593
CCL21		IVW	2	-0.035229	-0.25804	0.187582	0.113679	0.756638	0.996593
DTD2		IVW	2	-0.0938293	-0.687292	0.499633	0.302787	0.756648	0.996593
CR2		IVW	5	-0.018413	-0.135451	0.0986252	0.0597134	0.757811	0.996593
CES1		Wald ratio	1	0.101254	-0.54681	0.749319	0.330645	0.759427	0.962845
PLAU		IVW	3	-0.0137391	-0.101726	0.0742478	0.0448913	0.759564	0.996593
SNCA		Wald ratio	1	-0.0867679	-0.643731	0.470195	0.284165	0.760105	0.962845
UPP1		Wald ratio	1	-0.0433145	-0.321381	0.234752	0.141871	0.76013	0.962845
GSTM1		IVW	8	-0.0101941	-0.0759077	0.0555196	0.0335274	0.761089	0.996593
MMP9		Wald ratio	1	0.0569057	-0.310231	0.424043	0.187315	0.761282	0.962845
MTRF1L		Wald ratio	1	0.0253361	-0.138842	0.189514	0.0837642	0.762294	0.962845
GFER		Wald ratio	1	0.0771558	-0.423964	0.578275	0.255673	0.762823	0.962845
CTRB2		IVW	4	-0.0239751	-0.180529	0.132579	0.0798743	0.764055	0.996593
TREML1		IVW	2	-0.0676429	-0.510796	0.375511	0.226099	0.764807	0.996593
RNASE3		IVW	6	-0.0154117	-0.117276	0.0864523	0.0519714	0.766817	0.996593
CD200		Wald ratio	1	0.05	-0.28075	0.38075	0.16875	0.767004	0.962845
FTL		Wald ratio	1	-0.0893805	-0.68085	0.502088	0.30177	0.767087	0.962845
SLIT2		IVW	2	0.0610171	-0.346001	0.468035	0.207662	0.768889	0.996593
FCER2		IVW	7	-0.0116098	-0.0892414	0.0660219	0.039608	0.769433	0.996593
CDKN2D		Wald ratio	1	-0.921276	-7.08177	5.23922	3.14311	0.769438	0.962845
CTSF		IVW	2	-0.0248472	-0.192097	0.142403	0.0853317	0.770911	0.996593
IRF2		Wald ratio	1	-0.0868902	-0.675488	0.501707	0.300305	0.772321	0.962845
CACYBP		Wald ratio	1	-0.0284035	-0.221332	0.164525	0.0984329	0.77292	0.962845
CPB2		IVW	5	-0.00953933	-0.074769	0.0556903	0.0332804	0.774392	0.996593
PLXNC1		IVW	10	0.00706848	-0.041323	0.05546	0.0246896	0.774653	0.996593
EFNB2		IVW	2	-0.057218	-0.451576	0.33714	0.201203	0.77612	0.996593
SNAP29		Wald ratio	1	-0.0704411	-0.558183	0.417301	0.248848	0.777124	0.962845
PCSK7		IVW	7	-0.010061	-0.079828	0.0597059	0.0355954	0.777445	0.996593
SAA1		IVW	4	-0.012214	-0.0970058	0.0725777	0.0432611	0.777689	0.996593
TIMP4		IVW	7	-0.0103075	-0.0820866	0.0614715	0.036622	0.77836	0.996593
MTHFD2		IVW	2	-0.0294536	-0.234562	0.175655	0.104647	0.778361	0.996593
NT5M		Wald ratio	1	-0.0465195	-0.371966	0.278927	0.166044	0.779352	0.962845
GRHPR		Wald ratio	1	0.0621433	-0.380317	0.504604	0.225745	0.7831	0.962845
PARP1		Wald ratio	1	-0.0712166	-0.580119	0.437685	0.259644	0.783865	0.962845
CD4		Wald ratio	1	0.0971993	-0.600264	0.794662	0.355848	0.784739	0.962845
TNFSF15		Wald ratio	1	0.0682451	-0.42312	0.55961	0.250696	0.785451	0.962845
MAPK8		Wald ratio	1	-0.0674956	-0.554885	0.419893	0.248668	0.786061	0.962845
RIPK2		Wald ratio	1	0.0627962	-0.39237	0.517962	0.232227	0.786846	0.962845
SDF2		IVW	3	-0.0241048	-0.200816	0.152607	0.0901588	0.789193	0.996593
RPIA		Wald ratio	1	-0.0355444	-0.297207	0.226118	0.133501	0.790049	0.962845
MAP2K3		Wald ratio	1	-0.0766046	-0.64472	0.491511	0.289855	0.79156	0.962845
CCL17		IVW	2	0.0351298	-0.225824	0.296084	0.13314	0.79189	0.996593
CD36		IVW	4	-0.0216381	-0.183065	0.139789	0.0823605	0.792764	0.996593
HGD		IVW	2	-0.0290229	-0.246267	0.188221	0.110839	0.793438	0.996593
PTPRS		Wald ratio	1	0.0685139	-0.444937	0.581965	0.261965	0.793677	0.962845
BCAN		IVW	2	0.0245841	-0.160012	0.20918	0.0941817	0.794071	0.996593
SAA2		IVW	4	-0.0139155	-0.118551	0.0907198	0.0533853	0.794354	0.996593
ETFA		Wald ratio	1	0.0657439	-0.429343	0.56083	0.252595	0.794652	0.962845
NELL1		IVW	7	0.0136151	-0.0896777	0.116908	0.0527004	0.796138	0.996593
CP		IVW	2	-0.152552	-1.31007	1.00496	0.590569	0.796164	0.996593
DBI		IVW	2	-0.0143014	-0.12291	0.0943069	0.0554124	0.796337	0.996593
DECR1		IVW	2	-0.118554	-1.02002	0.782916	0.459934	0.796589	0.996593
MAN1A2		IVW	4	-0.0204952	-0.176663	0.135672	0.0796772	0.797003	0.996593
ACVRL1		IVW	3	-0.0275276	-0.239921	0.184866	0.108364	0.799473	0.996593
TXNDC5		IVW	6	0.018116	-0.124521	0.160753	0.0727738	0.80341	0.996593
RAD23B		Wald ratio	1	0.0621019	-0.427898	0.552102	0.25	0.803819	0.962845
GLRX3		Wald ratio	1	-0.0404551	-0.360101	0.279191	0.163085	0.804086	0.962845
RNASE4		IVW	4	-0.023628	-0.21101	0.163755	0.0956033	0.804795	0.996593
SDCBP2		Wald ratio	1	0.0665323	-0.462984	0.596048	0.270161	0.805474	0.962845
XPNPEP1		Wald ratio	1	-0.0520833	-0.467222	0.363056	0.211806	0.805758	0.962845
ACAT1		Wald ratio	1	-0.0369393	-0.331715	0.257836	0.150396	0.805981	0.962845
IGFBP5		Wald ratio	1	0.0813492	-0.568095	0.730794	0.331349	0.806062	0.962845
LRP12		IVW	2	0.0440211	-0.312036	0.400079	0.181662	0.808529	0.996593
LGALS3		IVW	4	0.0100074	-0.0711011	0.0911159	0.0413819	0.808911	0.996593
PROK2		IVW	5	0.00774812	-0.0553857	0.0708819	0.0322111	0.80991	0.996593
ECHS1		Wald ratio	1	-0.0699659	-0.641911	0.50198	0.291809	0.810512	0.962845
SERPINB5		Wald ratio	1	0.0244428	-0.175643	0.224529	0.102085	0.810767	0.962845
SELE		Wald ratio	1	0.0285962	-0.205789	0.262981	0.119584	0.811004	0.962845
MAP3K3		Wald ratio	1	0.0664137	-0.480304	0.613131	0.278937	0.811807	0.962845
INPP5B		IVW	2	-0.0218016	-0.201362	0.157759	0.0916123	0.811899	0.996593
CCL22		IVW	6	0.0115425	-0.0836277	0.106713	0.0485562	0.812103	0.996593
CAMP		Wald ratio	1	-0.0394495	-0.366716	0.287817	0.166972	0.813228	0.962845
NEO1		Wald ratio	1	0.0856698	-0.628723	0.800062	0.364486	0.814176	0.962845
MMP1		IVW	7	0.0122821	-0.0908294	0.115394	0.0526079	0.8154	0.996593
NUDT12		IVW	5	-0.0103861	-0.0975972	0.076825	0.0444955	0.815435	0.996593
CBL		Wald ratio	1	-0.0239969	-0.226782	0.178788	0.103462	0.816585	0.962845
NPTX2		Wald ratio	1	0.0554217	-0.413089	0.523933	0.239036	0.816651	0.962845
KPNA2		Wald ratio	1	-0.0578947	-0.549614	0.433825	0.250877	0.817494	0.962845
EFNA3		Wald ratio	1	-0.0634573	-0.605996	0.479081	0.276805	0.818675	0.962845
COMP		IVW	5	-0.0171694	-0.164029	0.12969	0.0749285	0.818757	0.996593
NT5E		IVW	4	0.00779478	-0.0588968	0.0744864	0.0340263	0.818806	0.996593
CCL3		IVW	2	-0.0181332	-0.174584	0.138318	0.0798218	0.820291	0.996593
COL6A3		IVW	2	-0.0442384	-0.426125	0.337648	0.19484	0.820385	0.996593
NCR1		IVW	4	0.0117507	-0.0897272	0.113229	0.0517744	0.820456	0.996593
OMD		Wald ratio	1	0.0560997	-0.429101	0.5413	0.247551	0.82072	0.96323
DNAJC17		IVW	2	0.0463633	-0.355474	0.448201	0.205019	0.821092	0.996593
HIBCH		IVW	5	0.0117197	-0.0899505	0.11339	0.0518725	0.821253	0.996593
PEBP1		IVW	7	0.0105358	-0.0811531	0.102225	0.04678	0.821809	0.996593
INSL5		Wald ratio	1	0.0679443	-0.526202	0.662091	0.303136	0.82265	0.963479
TFF3		IVW	3	-0.00866542	-0.0848795	0.0675487	0.0388847	0.823653	0.996593
RGS18		Wald ratio	1	-0.0529197	-0.52146	0.41562	0.239051	0.824801	0.963986
DCLK1		IVW	3	-0.0142786	-0.141768	0.113211	0.0650455	0.826247	0.996593
DUSP13		IVW	2	0.0148303	-0.117692	0.147353	0.0676134	0.826386	0.996593
PLA2G12B		IVW	2	0.0322225	-0.258727	0.323172	0.148444	0.828155	0.996593
IGFBP1		IVW	2	-0.0323678	-0.324732	0.259996	0.149165	0.828214	0.996593
LEFTY2		IVW	7	-0.00554341	-0.0556233	0.0445364	0.0255509	0.828243	0.996593
ALOX15B		Wald ratio	1	-0.0404858	-0.408151	0.327179	0.187584	0.829122	0.967022
BOC		IVW	4	-0.0257771	-0.2599	0.208345	0.11945	0.829146	0.996593
PDGFA		IVW	3	0.0508645	-0.418539	0.520268	0.239491	0.831806	0.996593
KIR2DL4		IVW	4	-0.250658	-2.60672	2.1054	1.20207	0.834821	0.996593
FKBP2		Wald ratio	1	0.057377	-0.484262	0.599016	0.276347	0.83552	0.972462
PF4		IVW	2	-0.0337823	-0.353006	0.285441	0.162869	0.835682	0.996593
KLK11		IVW	6	-0.00378547	-0.0395575	0.0319865	0.018251	0.835688	0.996593
ANG		IVW	7	0.00692219	-0.0585253	0.0723697	0.0333916	0.835773	0.996593
GFRA1		Wald ratio	1	0.0146613	-0.127037	0.15636	0.0722952	0.839294	0.972695
MMAB		IVW	6	-0.00883671	-0.0949381	0.0772647	0.0439293	0.840575	0.996593
UBE2N		Wald ratio	1	-0.0567823	-0.616341	0.502776	0.285489	0.842345	0.972695
TFPI2		Wald ratio	1	0.0688705	-0.618659	0.7564	0.350781	0.844348	0.972695
GLIPR1		Wald ratio	1	-0.0291036	-0.325728	0.26752	0.151339	0.847501	0.972695
SGK3		Wald ratio	1	0.0512933	-0.475441	0.578027	0.268742	0.848632	0.972695
MYBPC1		Wald ratio	1	-0.0319549	-0.363534	0.299624	0.169173	0.85018	0.972695
DHX58		IVW	2	0.0353473	-0.333036	0.40373	0.187951	0.850824	0.996593
WWOX		Wald ratio	1	0.0359712	-0.339108	0.41105	0.191367	0.8509	0.972695
NNMT		Wald ratio	1	0.0518053	-0.491272	0.594882	0.27708	0.851685	0.972695
RARRES2		IVW	4	-0.0107237	-0.1233	0.101852	0.0574368	0.851893	0.996593
TPI1		Wald ratio	1	-0.0535373	-0.619426	0.512352	0.288719	0.852891	0.972695
CCL11		IVW	2	0.026378	-0.252521	0.305277	0.142295	0.852935	0.996593
CAMP		IVW	2	-0.02374	-0.275002	0.227522	0.128195	0.853082	0.996593
ITIH1		IVW	8	0.00862403	-0.0830028	0.100251	0.0467484	0.853639	0.996593
SLAMF6		Wald ratio	1	0.0141243	-0.13629	0.164539	0.076742	0.853975	0.972695
VWC2		IVW	7	0.00828759	-0.0804215	0.0969966	0.0452597	0.85471	0.996593
LDHA		Wald ratio	1	-0.0569569	-0.666965	0.553051	0.311229	0.854793	0.972695
LGALS2		IVW	2	-0.0113337	-0.132887	0.11022	0.0620171	0.854993	0.996593
LRP4		IVW	3	0.00624693	-0.06147	0.0739639	0.0345495	0.856516	0.996593
TMEFF1		Wald ratio	1	0.0423841	-0.424901	0.509669	0.238411	0.858898	0.975388
F13B		IVW	2	-0.00671274	-0.0809609	0.0675354	0.0378817	0.859349	0.996593
ANXA7		IVW	2	0.0314218	-0.324977	0.38782	0.181836	0.862806	0.996593
GOLM1		IVW	3	0.0130189	-0.134857	0.160895	0.075447	0.863	0.996593
DNAJB12		Wald ratio	1	0.027611	-0.290036	0.345258	0.162065	0.864719	0.980015
ST6GALNAC6		IVW	3	0.0248137	-0.263619	0.313246	0.147159	0.866097	0.996593
SIAE		Wald ratio	1	0.0298359	-0.319085	0.378757	0.178021	0.8669	0.980506
SERPINF2		IVW	4	0.0234349	-0.251521	0.298391	0.140284	0.867328	0.996593
ASGR1		IVW	2	0.0289212	-0.316016	0.373859	0.175989	0.869467	0.996593
PPP2R5A		Wald ratio	1	0.0580645	-0.645006	0.761135	0.35871	0.871408	0.982614
ADAMTS5		IVW	5	-0.00525134	-0.0689647	0.058462	0.0325068	0.871663	0.996593
ITIH4		IVW	2	0.0535263	-0.607224	0.714276	0.337117	0.873845	0.996593
TF		Wald ratio	1	-0.015162	-0.202922	0.172598	0.095796	0.874241	0.982614
ANXA7		IVW	2	0.0276958	-0.322213	0.377604	0.178525	0.876713	0.996593
HADH		Wald ratio	1	0.030086	-0.350401	0.410573	0.194126	0.876836	0.982614
DLK2		Wald ratio	1	0.0124459	-0.147706	0.172597	0.08171	0.878936	0.982614
COL2A1		IVW	6	-0.0063284	-0.0880022	0.0753454	0.0416703	0.879291	0.996593
SERPINE2		IVW	6	-0.00506443	-0.0709102	0.0607814	0.0335948	0.880173	0.996593
RBP1		Wald ratio	1	-0.0277469	-0.388857	0.333363	0.18424	0.880289	0.982614
LRRC15		IVW	6	-0.00661581	-0.0943589	0.0811273	0.0447669	0.882514	0.996593
RNASE6		IVW	7	0.00379674	-0.046606	0.0541995	0.0257157	0.882624	0.996593
DUSP28		IVW	2	0.0123672	-0.152925	0.177659	0.0843326	0.88341	0.996593
PARK7		IVW	2	0.0262602	-0.324774	0.377295	0.179099	0.883429	0.996593
PTGES2		Wald ratio	1	0.0306435	-0.381777	0.443064	0.210419	0.884213	0.982614
SNUPN		Wald ratio	1	0.0164582	-0.205477	0.238394	0.113232	0.884435	0.982614
B3GNT8		IVW	5	0.00505666	-0.0631703	0.0732837	0.0348097	0.884501	0.996593
EDAR		IVW	7	-0.00654282	-0.0966811	0.0835955	0.0459889	0.886867	0.996593
DTD1		Wald ratio	1	-0.0149626	-0.222204	0.192279	0.105736	0.887468	0.982614
NUDT9		IVW	2	-0.0170084	-0.253069	0.219052	0.120439	0.887696	0.996593
RARRES1		IVW	6	0.00402044	-0.0518758	0.0599167	0.0285185	0.887889	0.996593
OLR1		Wald ratio	1	0.0540201	-0.698216	0.806256	0.383794	0.888065	0.982614
NPPB		Wald ratio	1	-0.0265487	-0.397301	0.344204	0.189159	0.888383	0.982614
APOB		Wald ratio	1	-0.0263158	-0.400824	0.348192	0.191076	0.890458	0.982614
ROBO2		IVW	3	0.0216281	-0.287219	0.330475	0.157575	0.890828	0.996593
TGM4		Wald ratio	1	0.035225	-0.471076	0.541526	0.258317	0.891534	0.982614
CDHR5		Wald ratio	1	-0.034188	-0.525584	0.457208	0.250712	0.891534	0.982614
AKR1C4		IVW	8	0.00555535	-0.0749976	0.0861083	0.0410984	0.892476	0.996593
UGT1A6		IVW	3	-0.0116515	-0.181808	0.158505	0.0868145	0.893236	0.996593
SHBG		IVW	3	-0.00903735	-0.142225	0.124151	0.0679531	0.894198	0.996593
DLL1		IVW	2	0.0168341	-0.231856	0.265524	0.126883	0.894451	0.996593
C1QC		IVW	10	0.00694987	-0.0961864	0.110086	0.0526206	0.894925	0.996593
ENTPD5		IVW	9	0.00606247	-0.0847168	0.0968418	0.046316	0.895859	0.996593
HDGF		Wald ratio	1	0.0238411	-0.334411	0.382093	0.182781	0.896222	0.983537
HDGF		Wald ratio	1	0.0240964	-0.337992	0.386185	0.184739	0.896222	0.983537
NDRG3		IVW	2	-0.0181637	-0.291748	0.25542	0.139584	0.896466	0.996593
FAH		IVW	6	0.0051556	-0.0730189	0.0833301	0.039885	0.897151	0.996593
PARP1		Wald ratio	1	0.0367279	-0.522805	0.59626	0.285476	0.897631	0.983537
SEMA4D		IVW	6	0.00375054	-0.0534369	0.060938	0.0291773	0.897719	0.996593
LRRC4B		IVW	2	0.0519899	-0.741748	0.845728	0.404968	0.897848	0.996593
F7		IVW	7	0.00411212	-0.0587277	0.0669519	0.0320611	0.897944	0.996593
PRSS22		IVW	3	0.00718987	-0.102848	0.117228	0.0561417	0.898096	0.996593
PSAT1		IVW	2	0.0156727	-0.227238	0.258583	0.123934	0.899368	0.996593
DSCAM		IVW	2	0.0155346	-0.227336	0.258406	0.123914	0.900234	0.996593
PRKCB		Wald ratio	1	-0.021978	-0.380952	0.336996	0.18315	0.904483	0.987795
GPX7		IVW	7	0.00560967	-0.0868789	0.0980982	0.047188	0.905371	0.996593
GAS1		IVW	2	0.0159089	-0.24881	0.280628	0.135061	0.906233	0.996593
PGLYRP3		Wald ratio	1	0.0735376	-1.17562	1.3227	0.637326	0.90814	0.987795
PSG7		Wald ratio	1	-0.12544	-2.26777	2.01689	1.09302	0.908632	0.987795
NMRAL1		IVW	11	0.00484745	-0.0783067	0.0880016	0.0424256	0.909033	0.996593
GCA		IVW	2	-0.00568587	-0.10436	0.0929884	0.050344	0.910078	0.996593
DDT		IVW	2	0.0145336	-0.24042	0.269487	0.130078	0.911038	0.996593
PDIA5		IVW	7	0.00325732	-0.0542201	0.0607347	0.0293252	0.911556	0.996593
C3		Wald ratio	1	0.0264106	-0.444178	0.496999	0.240096	0.912409	0.987795
C3		Wald ratio	1	0.0223577	-0.376016	0.420732	0.203252	0.912409	0.987795
C3		Wald ratio	1	0.026538	-0.446321	0.499397	0.241255	0.912409	0.987795
KLK3		IVW	2	-0.0241771	-0.458162	0.409808	0.221421	0.913051	0.996593
FGFBP1		Wald ratio	1	-0.0190083	-0.367273	0.329256	0.177686	0.914807	0.987795
BTD		IVW	9	0.00310042	-0.0541106	0.0603115	0.0291893	0.91541	0.996593
CRLF1		IVW	2	-0.00637082	-0.124431	0.11169	0.060235	0.915768	0.996593
GPNMB		IVW	7	0.00422333	-0.0766333	0.0850799	0.0412534	0.918459	0.996593
LGALS3BP		IVW	2	0.0112858	-0.20558	0.228152	0.110646	0.918758	0.996593
PRPSAP2		Wald ratio	1	0.0288136	-0.529288	0.586915	0.284746	0.919399	0.987795
PCBD2		Wald ratio	1	-0.0890337	-1.8575	1.67944	0.90228	0.921395	0.987795
LDHC		Wald ratio	1	-0.0276243	-0.57989	0.524641	0.281768	0.921901	0.987795
NMT2		Wald ratio	1	0.021164	-0.404021	0.446349	0.216931	0.922281	0.987795
AMBP		IVW	2	0.0302047	-0.580516	0.640926	0.311592	0.922777	0.996593
PLD3		Wald ratio	1	0.0288035	-0.556012	0.613619	0.298375	0.923096	0.987795
WFIKKN1		IVW	2	0.0101484	-0.205229	0.225526	0.109886	0.926417	0.996593
FGR		IVW	2	0.0151534	-0.307266	0.337572	0.1645	0.926604	0.996593
CFL2		Wald ratio	1	0.0110533	-0.224707	0.246814	0.120286	0.926784	0.987795
GZMA		IVW	5	-0.00709991	-0.158729	0.144529	0.0773618	0.926877	0.996593
IGFBP3		IVW	4	-0.00551142	-0.124106	0.113083	0.0605076	0.927424	0.996593
SARS2		Wald ratio	1	-0.0109991	-0.251732	0.229734	0.122823	0.928643	0.987795
SPARC		Wald ratio	1	0.0241978	-0.507817	0.556213	0.271436	0.928965	0.987795
FCRL3		IVW	5	-0.00691748	-0.159076	0.145241	0.0776321	0.928998	0.996593
PLOD2		IVW	2	0.016759	-0.353085	0.386603	0.188696	0.929229	0.996593
CAPN2		IVW	3	0.00978087	-0.206332	0.225894	0.110262	0.929316	0.996593
LDLRAP1		IVW	2	-0.0122813	-0.28492	0.260357	0.139101	0.929646	0.996593
FABP1		Wald ratio	1	-0.0109589	-0.254393	0.232475	0.124201	0.92969	0.987795
FGL1		IVW	7	0.00425064	-0.0920413	0.100543	0.0491286	0.931052	0.996593
SCG3		IVW	7	0.00301562	-0.0657728	0.071804	0.0350961	0.931526	0.996593
SFTPD		IVW	7	0.00320554	-0.0700691	0.0764802	0.037385	0.93167	0.996593
LIMA1		Wald ratio	1	0.0184874	-0.406454	0.443429	0.216807	0.932046	0.988427
CFHR5		IVW	9	-0.00568936	-0.139025	0.127646	0.0680285	0.933349	0.996593
FAM177A1		IVW	6	0.00306399	-0.0719431	0.078071	0.0382689	0.936186	0.996593
FUT5		IVW	11	0.00237749	-0.0567382	0.0614931	0.030161	0.937171	0.996593
ALDOB		IVW	2	0.0390346	-0.933063	1.01113	0.495968	0.937268	0.996593
EFEMP1		IVW	2	-0.0180191	-0.480936	0.444898	0.236182	0.939186	0.996593
PNLIP		IVW	2	0.016944	-0.429173	0.463061	0.227611	0.940658	0.996593
CPOX		IVW	2	-0.00950888	-0.263708	0.24469	0.129693	0.941553	0.996593
LAG3		IVW	2	0.00782852	-0.214387	0.230044	0.113375	0.94495	0.996593
ARRB1		Wald ratio	1	-0.0124224	-0.365466	0.340621	0.180124	0.945017	0.995951
KLK12		Wald ratio	1	-0.00650289	-0.193439	0.180434	0.0953757	0.945641	0.995951
FAHD1		IVW	2	-0.0488203	-1.47955	1.38191	0.729966	0.946677	0.996593
VWF		Wald ratio	1	-0.00818926	-0.248954	0.232575	0.122839	0.946847	0.995951
NUDCD3		Wald ratio	1	0.0131062	-0.374784	0.400996	0.197903	0.947199	0.995951
MATN3		IVW	12	-0.00213582	-0.0658304	0.0615587	0.0324972	0.947598	0.996593
SNX8		IVW	2	0.0129181	-0.376002	0.401838	0.198429	0.948093	0.996593
UBE2C		Wald ratio	1	-0.00581818	-0.191127	0.179491	0.0945455	0.95093	0.995951
ANXA1		Wald ratio	1	0.00771971	-0.247755	0.263195	0.130344	0.952772	0.995951
TGM2		Wald ratio	1	0.0363725	-1.1689	1.24165	0.614937	0.952834	0.995951
REG1A		IVW	6	0.00314715	-0.102473	0.108767	0.0538877	0.953428	0.996593
C1QL1		IVW	2	-0.00430868	-0.148978	0.14036	0.0738108	0.95345	0.996593
SPON2		IVW	5	0.00282227	-0.0946401	0.100285	0.0497257	0.954739	0.996593
MYZAP		Wald ratio	1	0.0111732	-0.374804	0.397151	0.196927	0.954754	0.995951
PROS1		Wald ratio	1	0.0117949	-0.403323	0.426913	0.211795	0.955589	0.995951
CTSE		IVW	4	0.0024782	-0.0947316	0.099688	0.0495969	0.960149	0.996593
PGD		Wald ratio	1	-0.00964067	-0.402156	0.382875	0.200263	0.961605	0.995951
DCXR		IVW	2	-0.01241	-0.535981	0.511161	0.267128	0.962946	0.996593
ANXA2		IVW	5	0.0012922	-0.0554332	0.0580176	0.0289415	0.964387	0.996593
DEFA5		Wald ratio	1	0.0130218	-0.56049	0.586534	0.292608	0.964504	0.995951
NUCB1		IVW	2	0.00625485	-0.26951	0.28202	0.140697	0.964541	0.996593
DEF6		Wald ratio	1	-0.00312256	-0.14733	0.141085	0.0735753	0.966148	0.995951
CHMP2B		IVW	3	-0.00219872	-0.10483	0.100432	0.0523627	0.966507	0.996593
CREG1		IVW	2	-0.00644554	-0.311657	0.298766	0.15572	0.966984	0.996593
TMEM132B		IVW	2	0.00622124	-0.294103	0.306545	0.153227	0.967613	0.996593
APOBEC3G		IVW	2	-0.00481596	-0.238258	0.228626	0.119103	0.967746	0.996593
FAM171A1		IVW	2	0.0134196	-0.66135	0.688189	0.34427	0.968907	0.996593
PNLIPRP2		IVW	9	0.00177463	-0.0902503	0.0937995	0.0469515	0.969849	0.996593
HDHD3		Wald ratio	1	0.00282008	-0.153051	0.158691	0.0795262	0.971712	0.995951
CSK		Wald ratio	1	-0.00735294	-0.431059	0.416353	0.216176	0.972866	0.995951
PSAPL1		IVW	8	-0.00143749	-0.0858324	0.0829574	0.0430586	0.973368	0.996593
APOA4		Wald ratio	1	-0.00433735	-0.261263	0.252588	0.131084	0.973604	0.995951
NTF3		IVW	2	0.0242612	-1.41678	1.4653	0.735223	0.973676	0.996593
PPA1		IVW	2	0.00235738	-0.13811	0.142824	0.0716669	0.973759	0.996593
TNFRSF21		IVW	2	-0.00365694	-0.224494	0.21718	0.112672	0.974108	0.996593
TIMP2		IVW	2	0.00583762	-0.360959	0.372635	0.187141	0.975115	0.996593
NT5C2		IVW	2	0.00556664	-0.358513	0.369646	0.185755	0.976093	0.996593
OLFML3		IVW	2	0.00583987	-0.410183	0.421863	0.212257	0.97805	0.996593
PDCD6IP		Wald ratio	1	0.00356824	-0.256949	0.264086	0.132917	0.978583	0.995951
DEFB4A		IVW	4	0.0168005	-1.22838	1.26198	0.635295	0.978902	0.996593
XCL2		Wald ratio	1	0.129032	-9.53398	9.79204	4.93011	0.97912	0.995951
PRSS8		IVW	2	0.0100991	-0.7544	0.774598	0.390051	0.979344	0.996593
CEACAM8		IVW	2	-0.00531013	-0.434712	0.424091	0.219082	0.980663	0.996593
TGM3		IVW	5	0.00140871	-0.113274	0.116091	0.0585114	0.980792	0.996593
SYT11		Wald ratio	1	-0.00493583	-0.415123	0.405252	0.209279	0.981184	0.995951
LILRB3		IVW	8	-0.000800138	-0.0677493	0.0661491	0.0341578	0.981311	0.996593
PECR		Wald ratio	1	0.00323834	-0.274767	0.281244	0.141839	0.981785	0.995951
CHST12		IVW	2	0.00166495	-0.148112	0.151442	0.076417	0.982617	0.996593
IFI16		Wald ratio	1	0.00548847	-0.510867	0.521844	0.263447	0.983379	0.995951
IVD		IVW	2	0.00205042	-0.196668	0.200769	0.101387	0.983865	0.996593
SH3BGRL3		IVW	4	-0.00104812	-0.105798	0.103702	0.053444	0.984353	0.996593
FBLN1		IVW	3	0.00152333	-0.154985	0.158032	0.0798511	0.98478	0.996593
MCF2L		IVW	2	0.00266452	-0.282749	0.288079	0.145619	0.985401	0.996593
PNP		IVW	2	0.00148999	-0.177288	0.180268	0.0912132	0.986967	0.996609
NIT2		Wald ratio	1	-0.00367069	-0.456927	0.449586	0.231253	0.987336	0.995951
CALB2		Wald ratio	1	-0.00385356	-0.509904	0.502197	0.258189	0.988092	0.995951
P4HB		Wald ratio	1	-0.00157109	-0.214046	0.210903	0.108405	0.988437	0.995951
TNFRSF19		Wald ratio	1	0.00191388	-0.258794	0.262622	0.133014	0.98852	0.995951
S100A9		Wald ratio	1	-0.00372439	-0.547561	0.540112	0.277467	0.98929	0.995951
LYPD3		Wald ratio	1	0.00212314	-0.309979	0.314225	0.159236	0.989362	0.995951
WBP2		Wald ratio	1	-0.0034965	-0.538042	0.531049	0.272727	0.989771	0.995951
RAB6B		Wald ratio	1	0.00076599	-0.137357	0.138889	0.0704711	0.991328	0.995951
FLT1		Wald ratio	1	-0.00289855	-0.545449	0.539652	0.276812	0.991645	0.995951
USP15		IVW	2	0.000856663	-0.189343	0.191056	0.0970407	0.992956	0.998337
TXNDC12		Wald ratio	1	-0.00127959	-0.329827	0.327268	0.167626	0.993909	0.995951
YWHAB		IVW	2	-0.000587799	-0.15496	0.153784	0.0787614	0.994045	0.998337
JAG1		Wald ratio	1	-0.00144509	-0.38948	0.38659	0.197977	0.994176	0.995951
ACADSB		IVW	2	0.000657577	-0.208213	0.209528	0.106566	0.995077	0.998337
STAMBPL1		IVW	2	-0.00155796	-0.568583	0.565467	0.289298	0.995703	0.998337
C5		IVW	2	0.000275987	-0.208444	0.208996	0.10649	0.997932	0.998575
MDGA2		IVW	10	-5.02797e-05	-0.0552323	0.0551317	0.0281541	0.998575	0.998575

## Sheet: ST2
Supplement Table 2. Proteome wide Mendelian randomization analysis on PPD using proteomics from FinnGen.
Exposure	Outcome	method	nsnp	b	lo_ci	up_ci	se	pval	p_fdr
SRA1	PPD	Wald ratio	1	0.201732	0.121178	0.282287	0.0410995	9.18e-07	0.000669396
DCPS		Wald ratio	1	-0.170014	-0.262096	-0.0779327	0.0469804	0.000295933	0.0948593
PGP		Wald ratio	1	0.19302	0.0863462	0.299693	0.0544252	0.000390368	0.0948593
C8G		Wald ratio	1	-0.0918793	-0.145267	-0.0384917	0.0272385	0.000743177	0.135444
VEGFC		Wald ratio	1	0.24901	0.100878	0.397142	0.0755776	0.000985058	0.141119
FN3K		Wald ratio	1	-0.0594169	-0.0956652	-0.0231687	0.018494	0.00131463	0.141119
C5		Wald ratio	1	-0.110192	-0.177784	-0.0426004	0.0344855	0.00139679	0.141119
DPT		Wald ratio	1	-0.104923	-0.169891	-0.0399556	0.0331468	0.00154863	0.141119
PIGR		Wald ratio	1	-0.131227	-0.214077	-0.0483773	0.0422702	0.00190615	0.154398
B3GLCT		Wald ratio	1	0.122827	0.0413455	0.204309	0.0415723	0.0031313	0.192692
ITIH1		Wald ratio	1	0.0565349	0.0189491	0.0941207	0.0191764	0.00319684	0.192692
MANSC4		Wald ratio	1	-0.0765324	-0.127737	-0.0253277	0.0261248	0.00339522	0.192692
NMB		Wald ratio	1	0.124869	0.0409232	0.208814	0.0428294	0.00355127	0.192692
RELN		Wald ratio	1	0.150655	0.0489251	0.252386	0.0519032	0.00370053	0.192692
SIRPB1		IVW	3	0.0394207	0.012169	0.0666725	0.013904	0.00457947	0.403233
AKR1A1		Wald ratio	1	-0.0635159	-0.107493	-0.0195389	0.0224372	0.00464278	0.225639
DDR1		IVW	2	0.0773483	0.0225831	0.132114	0.0279414	0.0056362	0.403233
FLRT3		Wald ratio	1	0.0452315	0.0129938	0.0774693	0.0164478	0.00595953	0.250153
CD14		Wald ratio	1	0.126421	0.035931	0.216912	0.0461686	0.00617662	0.250153
CD14		Wald ratio	1	0.121212	0.0344505	0.207974	0.0442663	0.00617662	0.250153
AOC3		Wald ratio	1	0.0641054	0.0176423	0.110568	0.0237056	0.00684638	0.262685
SERPINA10		IVW	2	-0.0871778	-0.15275	-0.0216059	0.033455	0.00916549	0.403233
REG3G		IVW	2	-0.0534479	-0.0938019	-0.0130939	0.0205888	0.00943234	0.403233
TMEM106B		Wald ratio	1	-0.0990367	-0.174557	-0.023516	0.038531	0.0101607	0.370357
CPTP		Wald ratio	1	1.90886	0.414139	3.40357	0.762611	0.0123127	0.414078
IL1R2		Wald ratio	1	0.0750358	0.0158435	0.134228	0.0302002	0.0129691	0.414078
TCP11L1		Wald ratio	1	-0.105746	-0.189251	-0.0222403	0.0426048	0.0130642	0.414078
OAF		IVW	2	0.0437104	0.00886464	0.0785561	0.0177784	0.0139473	0.476998
ROR1		Wald ratio	1	-0.106167	-0.191821	-0.0205137	0.0437009	0.0151233	0.440997
ROR1		Wald ratio	1	-0.105093	-0.18988	-0.0203061	0.0432585	0.0151233	0.440997
SEMA5B		Wald ratio	1	0.0960236	0.0172785	0.174769	0.040176	0.0168451	0.472311
CCL16		Wald ratio	1	-0.0387086	-0.0708069	-0.00661023	0.0163767	0.0180966	0.488607
MICB		IVW	2	0.0447533	0.00763923	0.0818673	0.0189357	0.0181067	0.509159
IL11RA		Wald ratio	1	0.10332	0.0153591	0.191282	0.0448783	0.0213217	0.507991
IL11RA		Wald ratio	1	0.0912397	0.0135632	0.168916	0.0396308	0.0213217	0.507991
AIF1L		Wald ratio	1	0.0874366	0.0128745	0.161999	0.0380419	0.0215374	0.507991
MAN2B2		Wald ratio	1	0.0955602	0.0140305	0.17709	0.0415968	0.0216018	0.507991
ACP6		IVW	2	-0.0329923	-0.0611498	-0.00483478	0.0143661	0.021645	0.509159
TIRAP		Wald ratio	1	-0.0905427	-0.168471	-0.0126145	0.0397593	0.0227699	0.518728
ITIH3		IVW	2	-0.0478918	-0.0894261	-0.00635761	0.0211909	0.0238203	0.509159
AHSG		Wald ratio	1	0.0707815	0.00879497	0.132768	0.0316258	0.0252148	0.557019
IL10RB		Wald ratio	1	-0.112704	-0.21249	-0.0129182	0.0509112	0.0268466	0.572931
CILP2		Wald ratio	1	1.25218	0.138751	2.36561	0.568075	0.027507	0.572931
TMEM132A		Wald ratio	1	-0.0496877	-0.0949525	-0.00442291	0.0230943	0.0314356	0.628177
CLSTN1		Wald ratio	1	-0.0386189	-0.0738925	-0.00334519	0.0179968	0.0318828	0.628177
MDP1		Wald ratio	1	0.0736397	0.00559794	0.141681	0.0347152	0.0339005	0.637854
SRGN		Wald ratio	1	0.122877	0.00919894	0.236556	0.0579992	0.0341239	0.637854
GSTZ1		IVW	2	0.0321907	0.00232711	0.0620543	0.0152365	0.0346237	0.547698
HPGDS		Wald ratio	1	-0.0495147	-0.0966428	-0.00238668	0.0240449	0.0394694	0.664433
CDON		Wald ratio	1	0.0593474	0.00264096	0.116054	0.0289319	0.0402395	0.664433
PSMB4		Wald ratio	1	0.0735138	0.00313602	0.143892	0.035907	0.040625	0.664433
CTSB		Wald ratio	1	0.058713	0.00249482	0.114931	0.0286827	0.0406601	0.664433
FCRL1		Wald ratio	1	0.0717829	0.00279371	0.140772	0.0351986	0.0414131	0.664433
FCGR2A		IVW	2	-0.0249953	-0.0490764	-0.000914211	0.0122863	0.0419104	0.547698
ST3GAL6		IVW	2	0.0342259	0.00125037	0.0672015	0.0168243	0.0419194	0.547698
CRNN		Wald ratio	1	-0.0835526	-0.164134	-0.00297076	0.0411132	0.0421275	0.664433
TLR3		IVW	2	0.0441599	0.00150835	0.0868114	0.021761	0.0424263	0.547698
NAGLU		Wald ratio	1	0.0734637	0.0024871	0.14444	0.0362126	0.0424908	0.664433
HLA-C		IVW	3	-0.0229484	-0.045217	-0.000679745	0.0113615	0.0434012	0.547698
PRDX6		Wald ratio	1	0.106911	0.00310299	0.21072	0.0529635	0.0435301	0.664433
MFAP2		Wald ratio	1	0.0626226	0.00125245	0.123993	0.0313113	0.0455003	0.664433
TCL1A		Wald ratio	1	-0.0749296	-0.148361	-0.00149859	0.0374648	0.0455003	0.664433
AGT		Wald ratio	1	0.0909491	0.00133193	0.180566	0.045723	0.0466868	0.664433
PMM2		Wald ratio	1	0.137631	0.00171309	0.273549	0.0693458	0.0471775	0.664433
STX7		Wald ratio	1	-0.121562	-0.241729	-0.00139532	0.0613097	0.0473944	0.664433
POGLUT3		IVW	2	-0.0436378	-0.0868216	-0.000454107	0.0220325	0.0476349	0.547698
A1BG		IVW	2	0.0591939	0.000508473	0.117879	0.0299415	0.0480436	0.547698
REG1A		Wald ratio	1	-0.0988869	-0.197093	-0.000680675	0.0501052	0.048429	0.666127
PLG		Wald ratio	1	-0.0596513	-0.119689	0.000386927	0.0306317	0.0514906	0.695123
CTSB		IVW	2	0.038756	-0.0011841	0.0786961	0.0203776	0.0571853	0.611167
IL16		Wald ratio	1	0.0354097	-0.00140974	0.0722291	0.0187854	0.0594358	0.787795
PADI4		Wald ratio	1	0.060026	-0.00393504	0.123987	0.0326332	0.065854	0.831555
PILRA		IVW	2	0.0230464	-0.00168465	0.0477775	0.0126179	0.0677769	0.643881
TNR		Wald ratio	1	-0.111448	-0.232493	0.0095973	0.0617578	0.0711377	0.831555
AMY2B		Wald ratio	1	-0.0589407	-0.123075	0.0051935	0.0327216	0.0716584	0.831555
RELT		Wald ratio	1	0.0567759	-0.0054456	0.118997	0.0317456	0.0737016	0.831555
LILRA2		IVW	2	-0.0649933	-0.136527	0.00654067	0.0364969	0.074947	0.674523
CPXM1		Wald ratio	1	-0.0793871	-0.166911	0.00813718	0.0446552	0.0754404	0.831555
PIANP		Wald ratio	1	-0.760495	-1.60384	0.082854	0.43028	0.0771543	0.831555
PIANP		Wald ratio	1	-0.849412	-1.79137	0.0925412	0.480588	0.0771543	0.831555
BPNT1		Wald ratio	1	0.998147	-0.110044	2.10634	0.565404	0.0775016	0.831555
HSPB1		Wald ratio	1	-0.0456435	-0.0965267	0.00523967	0.0259608	0.0787186	0.831555
CFI		Wald ratio	1	-0.0792972	-0.167915	0.0093209	0.0452133	0.0794569	0.831555
HABP2		Wald ratio	1	-0.0649735	-0.137614	0.00766743	0.0370617	0.0795819	0.831555
HRG		IVW	2	0.022722	-0.00283999	0.048284	0.0130418	0.0814665	0.696538
PDGFRB		Wald ratio	1	-0.0264342	-0.0562386	0.00337014	0.0152063	0.0821453	0.831555
ENTPD6		Wald ratio	1	-0.0612509	-0.130564	0.00806201	0.0353637	0.0832689	0.831555
MMAB		Wald ratio	1	-0.0625606	-0.133527	0.00840558	0.0362072	0.0840155	0.831555
STARD10		Wald ratio	1	0.0753491	-0.0102829	0.160981	0.0436898	0.0845928	0.831555
SELP		Wald ratio	1	-0.0595983	-0.12735	0.00815305	0.034567	0.0846829	0.831555
KLK13		Wald ratio	1	-0.0499965	-0.107298	0.00730457	0.0292352	0.0872391	0.831555
LRPAP1		Wald ratio	1	0.0780743	-0.0115387	0.167687	0.0457209	0.0877056	0.831555
KYNU		Wald ratio	1	0.0507736	-0.00757585	0.109123	0.0297701	0.0880972	0.831555
ARSB		Wald ratio	1	0.0701732	-0.0105839	0.15093	0.0412026	0.0885447	0.831555
CD109		Wald ratio	1	0.0311873	-0.00475318	0.0671278	0.018337	0.0889829	0.831555
NID2		Wald ratio	1	0.0849897	-0.0131545	0.183134	0.0500736	0.0896405	0.831555
CBR3		Wald ratio	1	-0.033682	-0.0727053	0.00534122	0.0199098	0.0906976	0.831555
HP		IVW	3	-0.0299178	-0.0651288	0.00529322	0.0179648	0.0958418	0.70455
HP		IVW	2	-0.0306929	-0.0669291	0.00554321	0.0184878	0.0968803	0.70455
GSTM3		IVW	2	-0.0485288	-0.105853	0.00879589	0.0292473	0.0970639	0.70455
LEPR		Wald ratio	1	0.0202419	-0.00367513	0.0441589	0.0122026	0.0971514	0.831555
PROCR		Wald ratio	1	0.0265842	-0.00488373	0.0580522	0.0160551	0.0977595	0.831555
ITIH5		Wald ratio	1	0.101681	-0.0189049	0.222266	0.0615233	0.0983879	0.831555
ADGRF5		Wald ratio	1	0.0361859	-0.006742	0.0791138	0.021902	0.0984991	0.831555
MAPK3		Wald ratio	1	-0.0796542	-0.174187	0.0148785	0.048231	0.0986334	0.831555
CFB		IVW	2	-0.0815783	-0.178891	0.0157343	0.0496493	0.100364	0.70455
GXYLT1		Wald ratio	1	-0.0747524	-0.163935	0.0144305	0.0455015	0.100412	0.831555
POFUT1		Wald ratio	1	0.0804193	-0.0158068	0.176645	0.0490949	0.101414	0.831555
ENPP7		Wald ratio	1	-0.0259617	-0.0571711	0.00524772	0.0159232	0.10301	0.831555
BTN3A2		Wald ratio	1	0.0236717	-0.00502872	0.0523721	0.0146431	0.105969	0.831555
TXNDC15		Wald ratio	1	0.049613	-0.0105396	0.109766	0.0306901	0.105969	0.831555
PCSK9		IVW	2	-0.0660776	-0.1462	0.0140453	0.040879	0.106004	0.70455
PCSK9		IVW	2	-0.0632362	-0.14016	0.0136871	0.0392466	0.107125	0.70455
AHSG		Wald ratio	1	-0.0200584	-0.0446525	0.00453559	0.012548	0.109923	0.831555
F11		Wald ratio	1	0.0388108	-0.00891183	0.0865334	0.0243483	0.110939	0.831555
SERPINA1		Wald ratio	1	-0.0395767	-0.0882632	0.00910989	0.0248401	0.111102	0.831555
NPL		Wald ratio	1	0.0760553	-0.0185974	0.170708	0.0482922	0.11528	0.831555
LEFTY2		Wald ratio	1	-0.0296347	-0.0666221	0.00735276	0.0188711	0.116329	0.831555
BTN3A3		Wald ratio	1	0.0432607	-0.0107481	0.0972694	0.0275555	0.116427	0.831555
CTSS		Wald ratio	1	-0.0427498	-0.0961318	0.0106323	0.0272357	0.116503	0.831555
A4GALT		Wald ratio	1	0.0701131	-0.0185679	0.158794	0.0452454	0.121233	0.831555
TTPAL		Wald ratio	1	-0.0265908	-0.0603141	0.00713258	0.0172058	0.122236	0.831555
PCOLCE2		Wald ratio	1	0.035626	-0.00972889	0.0809809	0.0231402	0.123666	0.831555
CTRB1		Wald ratio	1	0.0522433	-0.0147485	0.119235	0.0341795	0.126389	0.831555
VSIR		Wald ratio	1	-0.0734685	-0.167935	0.0209984	0.0481974	0.127428	0.831555
ATF6B		Wald ratio	1	0.107663	-0.0307977	0.246123	0.0706431	0.127499	0.831555
ICAM1		IVW	2	-0.0181178	-0.0414494	0.00521384	0.0119039	0.128008	0.780992
GSR		Wald ratio	1	0.158138	-0.0455437	0.36182	0.103919	0.128074	0.831555
REG3G		Wald ratio	1	-0.0777164	-0.178225	0.0227926	0.0512801	0.129639	0.831555
NT5C3B		Wald ratio	1	0.0686327	-0.0201817	0.157447	0.0453135	0.129869	0.831555
CDNF		Wald ratio	1	-0.0639051	-0.146866	0.0190553	0.0423268	0.131093	0.831555
CTSH		IVW	2	-0.0301282	-0.0693777	0.00912121	0.0200252	0.132449	0.780992
OBP2B		Wald ratio	1	-0.0586135	-0.135056	0.0178292	0.0390014	0.132876	0.831555
ALPP		Wald ratio	1	0.0568322	-0.0174285	0.131093	0.0378881	0.133614	0.831555
GLRX2		Wald ratio	1	0.0601847	-0.0185647	0.138934	0.0401782	0.134148	0.831555
AZGP1		Wald ratio	1	-0.0577048	-0.133284	0.0178748	0.038561	0.134535	0.831555
TIMP3		Wald ratio	1	0.0449286	-0.0139234	0.103781	0.0300266	0.134576	0.831555
FCRL3		Wald ratio	1	0.0203605	-0.0063139	0.0470349	0.0136094	0.134637	0.831555
APOE		Wald ratio	1	0.049086	-0.0153737	0.113546	0.0328876	0.135558	0.831555
APOE		Wald ratio	1	0.0421897	-0.0132138	0.0975933	0.0282671	0.135558	0.831555
APOE		Wald ratio	1	0.0416293	-0.0130383	0.0962969	0.0278916	0.135558	0.831555
APOE		Wald ratio	1	0.040187	-0.0125866	0.0929606	0.0269253	0.135558	0.831555
SFRP5		Wald ratio	1	0.0660446	-0.0209881	0.153077	0.0444045	0.136925	0.831555
PREP		Wald ratio	1	0.0452547	-0.0144277	0.104937	0.0304502	0.137229	0.831555
LEFTY2		Wald ratio	1	-0.0438337	-0.101677	0.0140094	0.0295118	0.137466	0.831555
TLR10		Wald ratio	1	-0.0605165	-0.140699	0.0196663	0.0409095	0.139067	0.831555
GSS		Wald ratio	1	0.109633	-0.0360488	0.255314	0.0743273	0.140213	0.831555
MMP1		Wald ratio	1	0.0581822	-0.0192001	0.135564	0.0394808	0.140567	0.831555
ADA2		Wald ratio	1	0.0232027	-0.00785498	0.0542605	0.0158458	0.143116	0.831555
IGF2R		Wald ratio	1	0.0343227	-0.0116428	0.0802882	0.0234518	0.143319	0.831555
ADGRD1		IVW	2	-0.042882	-0.100408	0.0146442	0.0293501	0.144001	0.790182
LTK		Wald ratio	1	0.02927	-0.0100279	0.068568	0.02005	0.14433	0.831555
KIAA1549L		Wald ratio	1	-0.0384146	-0.0900688	0.0132396	0.0263542	0.144943	0.831555
VIT		IVW	2	-0.0412849	-0.0971146	0.0145447	0.0284845	0.147231	0.790182
NIF3L1		Wald ratio	1	-0.0380985	-0.0896428	0.0134457	0.0262981	0.147416	0.831555
CCL14		Wald ratio	1	-0.0267228	-0.0629182	0.00947248	0.018467	0.14788	0.831555
CAB39L		Wald ratio	1	-0.0605084	-0.142877	0.0218598	0.0420246	0.149914	0.831555
PPT1		Wald ratio	1	-0.0638437	-0.15093	0.0232426	0.0444318	0.150748	0.831555
ST6GAL2		IVW	2	-0.026381	-0.0623887	0.00962672	0.0183713	0.151005	0.790182
SOD3		Wald ratio	1	-0.0688555	-0.162897	0.0251858	0.0479802	0.151264	0.831555
ROR2		Wald ratio	1	-0.066008	-0.156366	0.0243496	0.0461008	0.152196	0.831555
RNASET2		IVW	2	0.0365714	-0.0135269	0.0866698	0.0255604	0.152491	0.790182
THBS2		Wald ratio	1	-0.0357281	-0.0847246	0.0132685	0.0249982	0.15294	0.831555
CA8		Wald ratio	1	0.0407483	-0.0152452	0.0967417	0.0285681	0.153765	0.831555
THG1L		Wald ratio	1	0.0362565	-0.013631	0.086144	0.0254528	0.154313	0.831555
PLEKHO2		Wald ratio	1	0.0476882	-0.0180211	0.113398	0.0335252	0.154893	0.831555
GSTA2		Wald ratio	1	0.0500338	-0.0191029	0.11917	0.0352738	0.156062	0.831555
CNTNAP2		Wald ratio	1	0.0334742	-0.013118	0.0800665	0.0237716	0.159083	0.831555
GNPTG		Wald ratio	1	-0.032273	-0.0772348	0.0126888	0.0229397	0.159468	0.831555
ADH7		Wald ratio	1	0.0491393	-0.0194758	0.117754	0.0350077	0.160417	0.831555
FAHD1		Wald ratio	1	-0.0575855	-0.138073	0.022902	0.041065	0.160826	0.831555
FOLR3		Wald ratio	1	-0.0434493	-0.10418	0.0172814	0.030985	0.160836	0.831555
TREM2		Wald ratio	1	-0.113884	-0.274482	0.0467146	0.081938	0.164566	0.842375
SERPINA5		Wald ratio	1	-0.0484593	-0.117092	0.0201737	0.0350169	0.166393	0.842375
SPON1		Wald ratio	1	-0.0622784	-0.150714	0.0261569	0.04512	0.1675	0.842375
ITIH4		Wald ratio	1	-0.18754	-0.453878	0.0787985	0.135887	0.167551	0.842375
OSMR		Wald ratio	1	-0.0439703	-0.106949	0.0190087	0.0321321	0.17118	0.853022
FCGR2B		IVW	2	0.0677036	-0.0294072	0.164814	0.0495463	0.171791	0.816877
PILRA		IVW	2	0.0195604	-0.00853067	0.0476515	0.0143322	0.172319	0.816877
SECTM1		Wald ratio	1	-0.0685899	-0.16729	0.0301101	0.0503571	0.173176	0.853022
SEMA3E		Wald ratio	1	-0.0525567	-0.128246	0.0231325	0.0386169	0.173521	0.853022
SEMA3E		IVW	2	0.0219471	-0.00969564	0.0535898	0.0161442	0.174008	0.816877
QSOX2		Wald ratio	1	0.0427375	-0.0191559	0.104631	0.0315782	0.175933	0.853022
PAM		IVW	2	-0.0255787	-0.0626925	0.0115351	0.0189356	0.176751	0.816877
SPATA20		Wald ratio	1	0.034554	-0.0156665	0.0847745	0.0256227	0.177475	0.853022
NTN1		Wald ratio	1	-0.0533392	-0.131058	0.0243791	0.0396522	0.178568	0.853022
CCL15		Wald ratio	1	0.0268577	-0.0122968	0.0660121	0.0199768	0.178805	0.853022
NTN1		Wald ratio	1	-0.0536251	-0.131843	0.0245927	0.039907	0.179029	0.853022
CD274		Wald ratio	1	-0.0417384	-0.102782	0.0193056	0.0311449	0.180201	0.85303
COL6A2		IVW	3	0.0421137	-0.0198238	0.104051	0.0316008	0.182637	0.821867
TPSB2		Wald ratio	1	-0.0786094	-0.19432	0.0371011	0.059036	0.183008	0.860727
GAS6		Wald ratio	1	-0.0512288	-0.127199	0.0247416	0.0387604	0.186275	0.86834
GNMT		Wald ratio	1	-0.0352549	-0.0876754	0.0171655	0.0267451	0.187443	0.86834
CLN5		Wald ratio	1	-0.0571106	-0.142396	0.0281746	0.0435129	0.189351	0.86834
HSDL2		IVW	2	-0.016426	-0.0410343	0.00818233	0.0125553	0.190774	0.825773
PLG		Wald ratio	1	-0.0732563	-0.183114	0.0366009	0.0560496	0.191216	0.86834
HEBP1		IVW	2	-0.0297126	-0.074466	0.0150409	0.0228334	0.193163	0.825773
LYZ		Wald ratio	1	0.024006	-0.0124948	0.0605069	0.0186229	0.197376	0.86834
RTP4		Wald ratio	1	0.0474258	-0.0249923	0.119844	0.036948	0.199288	0.86834
FUT3		Wald ratio	1	-0.0242984	-0.0614509	0.012854	0.0189553	0.199885	0.86834
COL6A1		Wald ratio	1	-0.0151892	-0.038417	0.00803859	0.0118509	0.199951	0.86834
TP53I3		Wald ratio	1	-0.0287078	-0.0726115	0.0151958	0.0223998	0.19998	0.86834
ALPG		Wald ratio	1	0.0622625	-0.0331208	0.157646	0.0486649	0.200752	0.86834
FAM151A		Wald ratio	1	-0.0574603	-0.145967	0.0310463	0.0451565	0.203205	0.86834
GSTA1		Wald ratio	1	-0.0376948	-0.0957753	0.0203857	0.0296329	0.203352	0.86834
GSTA1		Wald ratio	1	-0.0347478	-0.0882876	0.0187919	0.0273162	0.203352	0.86834
ASIP		Wald ratio	1	-0.0350518	-0.0891964	0.0190928	0.0276248	0.204494	0.86834
BPIFB1		Wald ratio	1	-0.03765	-0.0961613	0.0208612	0.0298527	0.207239	0.86834
BPIFB1		Wald ratio	1	-0.0383427	-0.0979304	0.021245	0.0304019	0.207239	0.86834
AGFG2		Wald ratio	1	0.0351163	-0.019522	0.0897547	0.0278767	0.207777	0.86834
GSTM1		Wald ratio	1	-0.0359331	-0.0920268	0.0201607	0.0286192	0.209277	0.86834
GSTM4		Wald ratio	1	-0.0547451	-0.140206	0.0307154	0.0436023	0.209277	0.86834
CD46		Wald ratio	1	-0.0464629	-0.1191	0.0261741	0.0370597	0.20994	0.86834
BCAM		Wald ratio	1	0.101045	-0.0570518	0.259142	0.0806618	0.210313	0.86834
FCRLB		Wald ratio	1	-0.0412934	-0.105975	0.0233883	0.0330008	0.210832	0.86834
MICA		IVW	3	-0.015307	-0.0392949	0.00868094	0.0122387	0.211044	0.876201
BTNL8		Wald ratio	1	-0.0531903	-0.13688	0.030499	0.0426987	0.212869	0.871807
HAVCR2		IVW	2	0.0297987	-0.0173263	0.0769237	0.0240434	0.215207	0.876201
EBI3		Wald ratio	1	-0.0169553	-0.0438399	0.00992932	0.0137166	0.216417	0.875295
CCL25		Wald ratio	1	0.080599	-0.0475274	0.208725	0.0653706	0.217593	0.875295
BTN2A2		Wald ratio	1	0.0202541	-0.0121097	0.0526179	0.0165121	0.219966	0.875295
TECTB		Wald ratio	1	0.0529831	-0.0317341	0.1377	0.043223	0.220272	0.875295
MFAP2		Wald ratio	1	0.0596668	-0.0360755	0.155409	0.0488481	0.221906	0.875295
LRP11		Wald ratio	1	0.0203007	-0.0123409	0.0529423	0.0166539	0.222853	0.875295
TFF1		Wald ratio	1	-0.0458227	-0.119742	0.028097	0.0377141	0.224366	0.875295
IL5RA		Wald ratio	1	0.0325875	-0.0200448	0.0852199	0.0268533	0.224923	0.875295
CCL23		Wald ratio	1	-0.0318585	-0.0834989	0.0197819	0.0263471	0.226592	0.875295
CCL23		Wald ratio	1	-0.0247857	-0.0649614	0.0153901	0.0204978	0.226592	0.875295
CST6		Wald ratio	1	0.0543569	-0.034426	0.14314	0.0452974	0.230139	0.875295
REG1B		Wald ratio	1	0.0418772	-0.0267411	0.110496	0.0350094	0.231629	0.875295
GPC1		Wald ratio	1	-0.0292939	-0.0772938	0.0187059	0.0244897	0.231629	0.875295
PGLYRP2		Wald ratio	1	0.0392952	-0.0251338	0.103724	0.0328719	0.23193	0.875295
MBL2		IVW	2	-0.0171428	-0.0452823	0.0109967	0.0143569	0.23246	0.903647
FCRL4		Wald ratio	1	0.0245691	-0.0158132	0.0649513	0.0206032	0.23307	0.875295
LRP11		Wald ratio	1	0.0183701	-0.0118921	0.0486323	0.0154399	0.234132	0.875295
LRP11		Wald ratio	1	0.0199189	-0.0128947	0.0527325	0.0167416	0.234132	0.875295
SERPINA10		Wald ratio	1	0.0234708	-0.0153572	0.0622988	0.0198102	0.236103	0.878048
PROC		Wald ratio	1	-0.0545796	-0.145098	0.0359386	0.0461828	0.237278	0.878048
ANG		Wald ratio	1	0.0282556	-0.0188294	0.0753406	0.024023	0.239519	0.881865
LIPN		IVW	2	0.0228908	-0.0154016	0.0611832	0.0195369	0.241331	0.903647
PCYOX1		Wald ratio	1	0.0202918	-0.0137456	0.0543292	0.017366	0.242614	0.887683
MASP1		Wald ratio	1	0.0491253	-0.0334751	0.131726	0.0421431	0.243744	0.887683
KNG1		Wald ratio	1	-0.0336952	-0.090619	0.0232286	0.0290428	0.24597	0.887683
KNG1		Wald ratio	1	-0.0489137	-0.131547	0.0337197	0.0421599	0.24597	0.887683
RPN1		Wald ratio	1	-0.0369539	-0.100038	0.02613	0.0321856	0.250907	0.901042
ENGASE		Wald ratio	1	0.0358993	-0.025668	0.0974667	0.0314119	0.253098	0.904453
CCL15		IVW	2	0.0215387	-0.0154658	0.0585432	0.0188799	0.253941	0.903647
MDGA1		Wald ratio	1	0.0147343	-0.0106795	0.0401481	0.0129662	0.255804	0.906391
KLK10		Wald ratio	1	-0.0372652	-0.101584	0.0270534	0.0328156	0.256127	0.906391
B4GALT2		Wald ratio	1	-0.0383681	-0.104874	0.0281382	0.0339318	0.258164	0.907339
MPI		Wald ratio	1	-0.487962	-1.33506	0.35914	0.432195	0.258884	0.907339
CCL15		IVW	2	0.0225489	-0.0166318	0.0617297	0.0199902	0.25932	0.903647
TPST1		Wald ratio	1	0.0532602	-0.0400245	0.146545	0.0475942	0.26312	0.90836
ANKRD16		Wald ratio	1	0.0730554	-0.0552328	0.201344	0.0654532	0.264359	0.90836
PARK7		Wald ratio	1	-0.0475131	-0.130988	0.0359622	0.0425894	0.26459	0.90836
NFASC		IVW	2	-0.0247064	-0.0681681	0.0187553	0.0221744	0.265198	0.903647
CAT		Wald ratio	1	0.0426832	-0.0324969	0.117863	0.0383572	0.265802	0.90836
LAMC2		Wald ratio	1	0.0230992	-0.0177311	0.0639295	0.0208318	0.267498	0.90836
CNTN4		Wald ratio	1	0.044875	-0.0345878	0.124338	0.0405422	0.26835	0.90836
CST3		Wald ratio	1	-0.0378804	-0.105097	0.029336	0.0342941	0.269344	0.90836
APMAP		Wald ratio	1	0.0479851	-0.0377503	0.133721	0.0437425	0.272646	0.90836
NTM		Wald ratio	1	-0.0438387	-0.122602	0.0349248	0.0401855	0.275313	0.90836
NTM		Wald ratio	1	-0.0438777	-0.122711	0.0349559	0.0402212	0.275313	0.90836
SGSH		Wald ratio	1	0.0799608	-0.063791	0.223713	0.0733428	0.27561	0.90836
SIGLEC11		IVW	2	0.0215878	-0.017292	0.0604677	0.0198366	0.276471	0.903647
FLRT2		Wald ratio	1	-0.0613612	-0.172164	0.0494412	0.0565318	0.277733	0.90836
NCF1		Wald ratio	1	0.0302764	-0.0247945	0.0853473	0.0280974	0.281234	0.90836
OLFM2		IVW	2	-0.0246619	-0.0695482	0.0202245	0.0229012	0.281534	0.903647
OLFM2		IVW	2	-0.02485	-0.0702059	0.0205059	0.0231408	0.282885	0.903647
SLAMF7		IVW	2	0.0541826	-0.0449292	0.153294	0.0505672	0.283947	0.903647
GLT8D2		Wald ratio	1	0.063011	-0.0523452	0.178367	0.0588552	0.284345	0.90836
TCN1		IVW	2	0.0286334	-0.0238535	0.0811203	0.0267791	0.284959	0.903647
AAMDC		Wald ratio	1	0.025838	-0.0218255	0.0735015	0.0243181	0.288009	0.90836
TDGF1		IVW	2	-0.0141119	-0.0402012	0.0119774	0.0133109	0.289063	0.903647
PCSK1		Wald ratio	1	-0.0148577	-0.042466	0.0127506	0.0140859	0.291519	0.90836
ACYP2		Wald ratio	1	0.0632059	-0.0543427	0.180755	0.0599738	0.291932	0.90836
RAET1L		Wald ratio	1	0.0219988	-0.018963	0.0629607	0.0208989	0.29251	0.90836
EPHB1		IVW	2	0.0276637	-0.0238583	0.0791858	0.0262868	0.292624	0.903647
CPPED1		Wald ratio	1	-0.014332	-0.0411743	0.0125103	0.013695	0.295325	0.90836
KLK14		Wald ratio	1	0.114584	-0.100834	0.330001	0.109907	0.297155	0.90836
IL18RAP		Wald ratio	1	0.044491	-0.0396408	0.128623	0.0429244	0.299971	0.90836
CLPS		Wald ratio	1	0.195783	-0.175138	0.566704	0.189245	0.300881	0.90836
CRTAC1		Wald ratio	1	-0.0326817	-0.0948538	0.0294904	0.0317205	0.302868	0.90836
SFTPD		Wald ratio	1	-0.0268512	-0.077997	0.0242946	0.0260948	0.303486	0.90836
CLEC11A		Wald ratio	1	-0.0461724	-0.134598	0.0422531	0.0451151	0.306101	0.90836
CLEC11A		Wald ratio	1	-0.0454775	-0.132572	0.0416171	0.0444361	0.306101	0.90836
PDIA5		Wald ratio	1	0.0235886	-0.0216327	0.06881	0.0230721	0.306597	0.90836
SHARPIN		Wald ratio	1	0.148048	-0.135778	0.431874	0.144809	0.306609	0.90836
ISG15		Wald ratio	1	-0.0428253	-0.124977	0.0393263	0.0419141	0.306904	0.90836
EGFLAM		Wald ratio	1	-0.0723093	-0.211544	0.0669257	0.0710383	0.308729	0.90836
ICAM4		Wald ratio	1	0.0560277	-0.0520342	0.16409	0.0551336	0.309526	0.90836
ICAM4		Wald ratio	1	0.0545318	-0.050645	0.159709	0.0536616	0.309526	0.90836
ISLR2		Wald ratio	1	0.0637412	-0.0597957	0.187278	0.063029	0.311873	0.90836
PROK2		Wald ratio	1	0.0256946	-0.0243774	0.0757666	0.0255469	0.314521	0.90836
GPC5		IVW	2	-0.0245218	-0.0723577	0.023314	0.024406	0.31502	0.903647
CBLN1		IVW	2	-0.0197938	-0.0587339	0.0191462	0.0198674	0.319105	0.903647
MANSC1		Wald ratio	1	-0.0409887	-0.121739	0.0397611	0.0411989	0.319786	0.90836
SMOC2		Wald ratio	1	0.0323984	-0.0314873	0.096284	0.0325947	0.320235	0.90836
UGT1A1		Wald ratio	1	-0.0240936	-0.0716668	0.0234797	0.0242721	0.320882	0.90836
UGT1A6		Wald ratio	1	-0.033821	-0.100601	0.0329592	0.0340715	0.320882	0.90836
VIT		Wald ratio	1	-0.0402985	-0.119882	0.0392849	0.0406037	0.320963	0.90836
IL17RB		Wald ratio	1	0.035977	-0.0350803	0.107034	0.0362537	0.321019	0.90836
IL17RA		IVW	2	0.0143573	-0.0140352	0.0427498	0.014486	0.321629	0.903647
CFH		Wald ratio	1	-0.0361451	-0.107785	0.0354953	0.0365512	0.322718	0.90836
SCG3		Wald ratio	1	-0.0280221	-0.0836777	0.0276335	0.0283957	0.32372	0.90836
LRFN4		Wald ratio	1	0.0208572	-0.0205829	0.0622972	0.0211429	0.323894	0.90836
PTPA		Wald ratio	1	-0.0275929	-0.0824533	0.0272674	0.02799	0.324224	0.90836
CST5		IVW	2	0.0211681	-0.0209759	0.0633122	0.0215021	0.324885	0.903647
S100A6		IVW	2	0.0320308	-0.03184	0.0959016	0.0325871	0.325643	0.903647
GM2A		Wald ratio	1	0.0397882	-0.0397358	0.119312	0.0405735	0.326768	0.90836
SIGLEC7		IVW	2	-0.0503918	-0.151939	0.0511552	0.0518097	0.330736	0.903647
MTHFS		Wald ratio	1	0.0323324	-0.0328921	0.0975569	0.0332778	0.331254	0.90836
BPI		Wald ratio	1	-0.03115	-0.094112	0.031812	0.0321235	0.332198	0.90836
CTHRC1		Wald ratio	1	1.36071	-1.39072	4.11215	1.40379	0.33239	0.90836
PLXNC1		IVW	2	0.0334663	-0.0342067	0.101139	0.0345271	0.332407	0.903647
LRIG1		IVW	2	-0.0171812	-0.0519311	0.0175686	0.0177295	0.332508	0.903647
FAM3B		Wald ratio	1	-0.0234149	-0.0709579	0.0241281	0.0242566	0.334395	0.90836
NMRAL1		Wald ratio	1	-0.213329	-0.647026	0.220368	0.221274	0.334999	0.90836
C1QTNF4		Wald ratio	1	0.0387101	-0.040221	0.117641	0.040271	0.336431	0.90836
C1QTNF4		Wald ratio	1	0.0291093	-0.0302455	0.088464	0.030283	0.336431	0.90836
C1QTNF4		Wald ratio	1	0.0315149	-0.032745	0.0957747	0.0327856	0.336431	0.90836
SMPD1		Wald ratio	1	0.0413509	-0.0435563	0.126258	0.04332	0.339808	0.90836
APOL3		Wald ratio	1	0.0153231	-0.0161576	0.0468038	0.0160616	0.340072	0.90836
FN1		Wald ratio	1	0.0245758	-0.0259841	0.0751356	0.0257958	0.340741	0.90836
FN1		Wald ratio	1	0.0248113	-0.0262331	0.0758558	0.0260431	0.340741	0.90836
CD300C		Wald ratio	1	0.0473033	-0.0502014	0.144808	0.0497473	0.34167	0.90836
SERPINE2		Wald ratio	1	-0.0270985	-0.0830443	0.0288473	0.0285438	0.342434	0.90836
SPINK7		Wald ratio	1	-0.336879	-1.03278	0.359026	0.355054	0.342717	0.90836
QPCTL		Wald ratio	1	0.0320945	-0.0345384	0.0987274	0.0339964	0.345141	0.90836
GGH		IVW	2	-0.0305699	-0.0940595	0.0329196	0.0323926	0.345307	0.903647
SERPINA12		Wald ratio	1	-0.023621	-0.0726959	0.025454	0.0250382	0.345478	0.90836
PPIE		Wald ratio	1	-0.0300599	-0.0927784	0.0326586	0.0319992	0.347529	0.90836
CKM		Wald ratio	1	0.0370134	-0.0402395	0.114266	0.0394147	0.347692	0.90836
SFTPB		Wald ratio	1	0.0225158	-0.024509	0.0695407	0.0239923	0.348007	0.90836
VTN		Wald ratio	1	-0.011149	-0.0345377	0.0122396	0.011933	0.350146	0.90836
SDF2		Wald ratio	1	-0.015821	-0.0490106	0.0173685	0.0169335	0.350146	0.90836
VTN		Wald ratio	1	-0.0398373	-0.123408	0.0437339	0.0426383	0.350146	0.90836
ICAM5		Wald ratio	1	0.0166096	-0.0183648	0.0515839	0.0178441	0.351948	0.90836
ICAM5		Wald ratio	1	0.0172218	-0.0190418	0.0534854	0.0185018	0.351948	0.90836
ICAM5		Wald ratio	1	0.0164951	-0.0182383	0.0512285	0.0177211	0.351948	0.90836
FCN2		Wald ratio	1	-0.0250711	-0.0778906	0.0277483	0.0269487	0.352201	0.90836
C1QC		Wald ratio	1	-0.0276969	-0.0860953	0.0307016	0.0297951	0.35259	0.90836
FBP2		Wald ratio	1	0.0338685	-0.0378244	0.105561	0.036578	0.354484	0.90836
MERTK		Wald ratio	1	0.0373307	-0.0417815	0.116443	0.0403633	0.355036	0.90836
SERPING1		Wald ratio	1	-0.0173889	-0.0543112	0.0195335	0.0188379	0.355967	0.90836
C6		Wald ratio	1	0.362007	-0.409569	1.13358	0.393661	0.357787	0.90836
PLXNB2		Wald ratio	1	0.0200981	-0.0227887	0.0629849	0.021881	0.358347	0.90836
PMEL		Wald ratio	1	-0.0421751	-0.132353	0.0480029	0.0460092	0.359317	0.90836
MAX		Wald ratio	1	-0.0407038	-0.127858	0.0464502	0.0444663	0.35999	0.90836
LILRA1		IVW	2	0.0444274	-0.0508888	0.139744	0.0486307	0.360945	0.903647
BCHE		Wald ratio	1	-0.0307498	-0.0968331	0.0353336	0.033716	0.361756	0.90836
BCHE		Wald ratio	1	-0.0331215	-0.104302	0.0380589	0.0363165	0.361756	0.90836
CDH11		IVW	2	-0.0168627	-0.0532826	0.0195572	0.0185816	0.364145	0.903647
OGN		Wald ratio	1	0.0211628	-0.0248476	0.0671732	0.0234747	0.367314	0.90836
LGALS3		Wald ratio	1	0.028431	-0.0334556	0.0903175	0.0315748	0.36789	0.90836
CRTAM		Wald ratio	1	-0.0350879	-0.111563	0.0413869	0.0390178	0.368503	0.90836
DNAJC30		Wald ratio	1	0.0351046	-0.0414169	0.111626	0.0390416	0.368568	0.90836
HGFAC		IVW	2	0.0193373	-0.0229705	0.0616452	0.0215856	0.370337	0.903647
C7		IVW	2	-0.024357	-0.0776978	0.0289838	0.0272147	0.37079	0.903647
CCN4		Wald ratio	1	0.0289816	-0.0346194	0.0925827	0.0324495	0.371788	0.90836
INHBC		Wald ratio	1	0.0106749	-0.012784	0.0341337	0.0119688	0.372451	0.90836
IGFBP7		Wald ratio	1	0.0370087	-0.0443998	0.118417	0.041535	0.372915	0.90836
BIN1		Wald ratio	1	0.630804	-0.758549	2.02016	0.708853	0.373523	0.90836
S100A7		Wald ratio	1	0.0177256	-0.0214737	0.056925	0.0199997	0.375457	0.90836
CST7		Wald ratio	1	-0.157607	-0.506742	0.191529	0.17813	0.376274	0.90836
SERPING1		IVW	3	0.0114655	-0.0139388	0.0368699	0.0129614	0.376378	0.903647
AGRN		Wald ratio	1	0.0413487	-0.0504113	0.133109	0.0468163	0.377122	0.90836
GP1BA		Wald ratio	1	-0.0486381	-0.157028	0.0597516	0.0553009	0.37912	0.90836
IGFBP3		Wald ratio	1	-0.0368773	-0.119162	0.0454079	0.0419822	0.379725	0.90836
HINT1		Wald ratio	1	-0.0392032	-0.126698	0.0482915	0.0446402	0.379832	0.90836
NPTXR		Wald ratio	1	-0.0281784	-0.0912599	0.0349032	0.0321845	0.381287	0.90836
NPTXR		Wald ratio	1	-0.0340792	-0.110371	0.0422123	0.0389242	0.381287	0.90836
ANGPTL1		IVW	2	0.0189825	-0.0236461	0.0616111	0.0217493	0.382779	0.903647
COMMD10		IVW	2	0.0316236	-0.0394053	0.102653	0.0362393	0.382863	0.903647
TPPP3		Wald ratio	1	0.0370178	-0.0463167	0.120352	0.0425176	0.383947	0.90945
DPP7		Wald ratio	1	0.0295008	-0.0370817	0.0960833	0.0339707	0.385164	0.90945
THSD1		Wald ratio	1	-0.0221714	-0.0722456	0.0279028	0.0255481	0.385487	0.90945
ZBP1		Wald ratio	1	0.0329598	-0.0417666	0.107686	0.0381257	0.387311	0.910456
CBLN2		Wald ratio	1	0.0302973	-0.0387411	0.0993357	0.0352237	0.389712	0.910456
GNPNAT1		Wald ratio	1	-0.0410275	-0.134727	0.0526721	0.0478059	0.390777	0.910456
CD177		IVW	2	0.0470913	-0.0606783	0.154861	0.0549845	0.39175	0.903647
ALDOB		Wald ratio	1	-0.658365	-2.17111	0.854383	0.77181	0.393651	0.910456
IL5RA		Wald ratio	1	-0.0346233	-0.114361	0.0451142	0.0406824	0.394734	0.910456
HGFAC		IVW	2	0.0185494	-0.0242281	0.0613269	0.0218252	0.395377	0.903647
MATN4		Wald ratio	1	0.0375703	-0.0492992	0.12444	0.0443212	0.396615	0.910456
LBP		Wald ratio	1	-0.0203892	-0.0675453	0.0267669	0.0240592	0.39674	0.910456
VSTM1		Wald ratio	1	-0.0294695	-0.0976864	0.0387473	0.0348045	0.397154	0.910456
VSTM1		Wald ratio	1	-0.0125737	-0.0416797	0.0165323	0.01485	0.397154	0.910456
ERAP1		IVW	2	0.0188377	-0.0248312	0.0625066	0.0222801	0.397834	0.903647
SIGLEC6		Wald ratio	1	0.018537	-0.0246079	0.061682	0.0220127	0.399729	0.913487
CD33		IVW	2	0.0118473	-0.0158383	0.039533	0.0141253	0.401621	0.903647
MLN		Wald ratio	1	-0.029794	-0.0998694	0.0402814	0.0357528	0.404657	0.921859
MICB		Wald ratio	1	0.0217477	-0.0296831	0.0731786	0.0262402	0.407221	0.923075
CTSC		Wald ratio	1	-0.0179873	-0.0605706	0.0245961	0.0217262	0.407723	0.923075
PPIL1		Wald ratio	1	0.0262669	-0.0363709	0.0889047	0.0319581	0.411124	0.925405
PI3		Wald ratio	1	0.0400098	-0.055903	0.135923	0.0489351	0.41358	0.925405
ENO3		Wald ratio	1	-0.0322394	-0.110098	0.0456188	0.0397235	0.417025	0.925405
BCAT2		Wald ratio	1	-0.0196553	-0.0672087	0.0278982	0.024262	0.417867	0.925405
PLXND1		Wald ratio	1	-0.0416104	-0.142423	0.0592023	0.0514351	0.418522	0.925405
LILRA4		Wald ratio	1	-0.0274935	-0.0941176	0.0391307	0.0339919	0.418617	0.925405
PRSS3		Wald ratio	1	-0.0415472	-0.142885	0.059791	0.0517031	0.421645	0.925405
CYTL1		Wald ratio	1	0.03552	-0.0513806	0.122421	0.044337	0.423053	0.925405
MST1		Wald ratio	1	-0.0101382	-0.0349769	0.0147004	0.0126728	0.423711	0.925405
CD55		Wald ratio	1	-0.0271134	-0.093984	0.0397572	0.0341177	0.426787	0.925405
FCGR2B		Wald ratio	1	0.0954237	-0.141064	0.331911	0.120657	0.429022	0.925405
XCL1		Wald ratio	1	0.032801	-0.0487005	0.114303	0.0415824	0.430217	0.925405
ASPSCR1		Wald ratio	1	-0.031432	-0.109642	0.046778	0.0399031	0.430867	0.925405
SLAMF7		IVW	2	-0.0281589	-0.0983828	0.042065	0.0358285	0.431905	0.935024
PTGFRN		IVW	2	-0.0411905	-0.144491	0.0621099	0.0527043	0.434485	0.935024
FGFBP3		Wald ratio	1	-0.0283334	-0.0993973	0.0427306	0.0362571	0.434534	0.925405
SULT1A1		IVW	2	0.0167454	-0.0254151	0.0589058	0.0215104	0.436288	0.935024
UGDH		Wald ratio	1	0.0368828	-0.0560618	0.129827	0.0474207	0.4367	0.925405
CNDP1		Wald ratio	1	-0.0436507	-0.153984	0.066683	0.0562927	0.438089	0.925405
ARL3		Wald ratio	1	0.0415526	-0.0635191	0.146624	0.053608	0.438269	0.925405
ANXA4		Wald ratio	1	-0.0314183	-0.111021	0.0481849	0.0406139	0.439176	0.925405
IFNAR1		Wald ratio	1	-0.0148679	-0.0526935	0.0229576	0.0192987	0.441058	0.925405
QPCT		IVW	2	-0.0356149	-0.12627	0.0550405	0.0462527	0.441296	0.935024
CNTFR		Wald ratio	1	-0.0478707	-0.169767	0.0740259	0.0621922	0.441464	0.925405
CNTFR		Wald ratio	1	-0.0523975	-0.185821	0.081026	0.0680732	0.441464	0.925405
CLSTN2		Wald ratio	1	-0.0458473	-0.162601	0.070906	0.059568	0.4415	0.925405
CNTN1		Wald ratio	1	0.04505	-0.0700644	0.160164	0.0587319	0.443054	0.925405
GREM1		Wald ratio	1	-0.0134221	-0.047808	0.0209638	0.0175438	0.444236	0.925405
ACP5		Wald ratio	1	-0.0332437	-0.118682	0.0521947	0.043591	0.445686	0.925405
ATXN3		Wald ratio	1	0.0280199	-0.0440613	0.100101	0.0367761	0.446117	0.925405
GP6		Wald ratio	1	-0.016757	-0.0599229	0.026409	0.0220235	0.446735	0.925405
TGM3		Wald ratio	1	-0.0246196	-0.0881857	0.0389464	0.0324316	0.447778	0.925405
CAPN2		Wald ratio	1	0.0785021	-0.124801	0.281805	0.103726	0.449158	0.925405
VEGFA		Wald ratio	1	-0.0324415	-0.116891	0.0520078	0.0430864	0.451485	0.925405
PRSS3		Wald ratio	1	0.0162468	-0.0263198	0.0588134	0.0217177	0.454405	0.925405
BTD		Wald ratio	1	-0.0164979	-0.0597438	0.026748	0.0220642	0.454629	0.925405
NCAM2		Wald ratio	1	-0.0215805	-0.0782363	0.0350753	0.028906	0.45532	0.925405
IDH1		Wald ratio	1	-0.0569641	-0.207587	0.0936589	0.0768485	0.45854	0.925405
PENK		Wald ratio	1	0.0193185	-0.0318385	0.0704754	0.0261005	0.459204	0.925405
SIGLEC14		Wald ratio	1	-0.0177225	-0.0646871	0.0292421	0.0239615	0.459529	0.925405
SIGLEC5		Wald ratio	1	-0.016994	-0.062028	0.0280401	0.0229765	0.459529	0.925405
SIGLEC14		Wald ratio	1	-0.0170401	-0.0621963	0.0281161	0.0230389	0.459529	0.925405
SIGLEC14		Wald ratio	1	-0.017592	-0.064211	0.0290269	0.0237852	0.459529	0.925405
SIGLEC5		Wald ratio	1	-0.0170976	-0.0624062	0.028211	0.0231166	0.459529	0.925405
FUCA1		Wald ratio	1	0.040554	-0.0675702	0.148678	0.0551654	0.462257	0.926721
RAB5A		Wald ratio	1	0.204946	-0.342048	0.751941	0.279079	0.462725	0.926721
PLXNB2		IVW	2	-0.00876931	-0.0321985	0.0146599	0.0119537	0.463187	0.935024
MATN3		IVW	2	0.0166142	-0.0278604	0.0610888	0.0226911	0.464053	0.935024
VEGFA		Wald ratio	1	-0.0271644	-0.100267	0.0459381	0.0372972	0.466415	0.92962
C1QTNF9		Wald ratio	1	0.0181551	-0.0309024	0.0672125	0.0250293	0.468236	0.92962
CFHR5		IVW	2	0.016328	-0.0278383	0.0604944	0.0225338	0.468697	0.935024
HNMT		Wald ratio	1	0.0302807	-0.0522593	0.112821	0.0421123	0.472112	0.92962
CHRDL2		Wald ratio	1	-0.0232124	-0.0868093	0.0403845	0.0324474	0.474371	0.92962
SCPEP1		Wald ratio	1	-0.0169796	-0.0635197	0.0295605	0.0237449	0.474557	0.92962
WFDC1		Wald ratio	1	0.0251785	-0.0439742	0.0943313	0.035282	0.475452	0.92962
CD8A		Wald ratio	1	0.0246113	-0.0432236	0.0924462	0.0346097	0.477015	0.92962
CHST11		Wald ratio	1	-0.0241867	-0.0912254	0.042852	0.0342034	0.479478	0.92962
ASAH2		IVW	2	-0.0245236	-0.0925175	0.0434703	0.0346908	0.479616	0.935024
LILRB2		Wald ratio	1	-0.0118908	-0.0449704	0.0211887	0.0168773	0.481093	0.92962
FUT5		IVW	2	-0.0186117	-0.070427	0.0332036	0.0264364	0.481421	0.935024
BDH2		Wald ratio	1	0.0329551	-0.0588335	0.124744	0.0468309	0.481617	0.92962
GPNMB		Wald ratio	1	-0.107863	-0.408308	0.192582	0.153288	0.481644	0.92962
GPNMB		Wald ratio	1	-0.107485	-0.406878	0.191907	0.152751	0.481644	0.92962
GPNMB		Wald ratio	1	-0.113911	-0.431204	0.203381	0.161884	0.481644	0.92962
MRI1		Wald ratio	1	-0.0418263	-0.158647	0.0749945	0.0596024	0.482832	0.92962
TAPBPL		IVW	2	-0.00842448	-0.0320253	0.0151763	0.0120412	0.484154	0.935024
PLXNA1		Wald ratio	1	0.0321645	-0.0579861	0.122315	0.0459952	0.484364	0.92962
BTD		Wald ratio	1	0.0143025	-0.025804	0.054409	0.0204625	0.484576	0.92962
GIPC2		Wald ratio	1	0.0228245	-0.0414835	0.0871325	0.0328102	0.486647	0.929682
F7		Wald ratio	1	-0.0106179	-0.0405691	0.0193332	0.0152812	0.487158	0.929682
IL6R		IVW	2	0.0077444	-0.0142936	0.0297824	0.0112439	0.490971	0.935024
IL6R		IVW	2	0.00772272	-0.0142555	0.0297009	0.0112134	0.491008	0.935024
SVEP1		Wald ratio	1	-0.0252513	-0.0972147	0.046712	0.036716	0.491612	0.930601
FABP2		Wald ratio	1	-0.010977	-0.0422909	0.0203369	0.0159765	0.492036	0.930601
MASP1		Wald ratio	1	0.0222693	-0.0413386	0.0858771	0.032453	0.492587	0.930601
IL6R		IVW	2	0.00767523	-0.0142596	0.0296101	0.0111913	0.492824	0.935024
FCN3		Wald ratio	1	-0.0315648	-0.122819	0.0596891	0.0465581	0.497793	0.930601
AOC1		Wald ratio	1	-0.0110596	-0.043093	0.0209739	0.0163436	0.498602	0.930601
AOC1		Wald ratio	1	-0.0126463	-0.0492756	0.023983	0.0186884	0.498602	0.930601
SPINT2		Wald ratio	1	0.0123235	-0.0235488	0.0481957	0.0183022	0.500735	0.930601
MMP8		Wald ratio	1	0.0258249	-0.0494417	0.101092	0.0384014	0.501265	0.930601
GNLY		Wald ratio	1	-0.0134966	-0.0529222	0.025929	0.0201151	0.502241	0.930601
GNLY		Wald ratio	1	-0.0164678	-0.0645727	0.0316372	0.0245433	0.502241	0.930601
C19orf53		Wald ratio	1	-0.0380984	-0.149818	0.0736214	0.0569999	0.503882	0.930601
CTSE		Wald ratio	1	0.0314439	-0.0608166	0.123704	0.0470717	0.504134	0.930601
ALB		Wald ratio	1	-0.0461354	-0.181774	0.0895027	0.0692031	0.504985	0.930601
NAGPA		Wald ratio	1	0.0305185	-0.0594121	0.120449	0.045883	0.505962	0.930601
PLA2G2A		Wald ratio	1	-0.0170925	-0.0675943	0.0334094	0.0257663	0.507096	0.930601
TGFB1		IVW	2	-0.0198848	-0.0786715	0.0389019	0.0299932	0.507345	0.935024
THY1		Wald ratio	1	0.0416124	-0.081958	0.165183	0.0630461	0.509234	0.930601
F5		Wald ratio	1	-0.0317423	-0.126027	0.0625421	0.0481043	0.509341	0.930601
ENPEP		Wald ratio	1	-0.0159037	-0.0633381	0.0315307	0.0242012	0.511089	0.93146
GLTPD2		IVW	2	0.0330355	-0.0655269	0.131598	0.0502869	0.511219	0.935024
ASPN		Wald ratio	1	-0.0200758	-0.0802039	0.0400523	0.0306776	0.512847	0.932274
COLEC11		IVW	2	0.0139408	-0.0279416	0.0558233	0.0213686	0.514144	0.935024
CCL7		IVW	2	0.0220249	-0.0442558	0.0883057	0.0338167	0.514851	0.935024
VNN2		Wald ratio	1	0.0130187	-0.0263657	0.052403	0.020094	0.517058	0.932274
TSTD1		Wald ratio	1	-0.0140469	-0.0566156	0.0285218	0.0217187	0.517783	0.932274
MMP7		Wald ratio	1	-0.0264038	-0.106574	0.0537661	0.040903	0.518589	0.932274
FKBP7		Wald ratio	1	-0.0174338	-0.0705136	0.0356461	0.0270816	0.519738	0.932274
CCL3		Wald ratio	1	-0.0191389	-0.0775549	0.0392771	0.0298041	0.520771	0.932274
CCL18		Wald ratio	1	-0.0140435	-0.0569071	0.0288202	0.0218692	0.520771	0.932274
CCL25		IVW	2	0.0147956	-0.0303863	0.0599776	0.023052	0.520979	0.935024
CRISP2		Wald ratio	1	0.0131095	-0.0269992	0.0532183	0.0204637	0.521766	0.932274
FREM1		IVW	2	0.0154839	-0.032251	0.0632187	0.0243545	0.524926	0.935024
SPINK4		Wald ratio	1	0.0212104	-0.0442209	0.0866417	0.0333833	0.525194	0.932955
MTHFSD		Wald ratio	1	-0.0416409	-0.170248	0.0869664	0.065616	0.525679	0.932955
BCL7A		Wald ratio	1	0.10121	-0.212397	0.414817	0.160004	0.527029	0.932955
APOL2		Wald ratio	1	0.0165858	-0.0348362	0.0680079	0.0262357	0.527267	0.932955
EPHA1		Wald ratio	1	0.0136443	-0.0292724	0.0565611	0.0218963	0.533196	0.935181
LILRB2		IVW	2	-0.0167551	-0.0696402	0.0361299	0.0269822	0.534619	0.942472
PPIC		Wald ratio	1	-0.0121992	-0.0508692	0.0264708	0.0197296	0.536364	0.935181
PCSK7		IVW	3	-0.00785459	-0.0330081	0.0172989	0.0128334	0.54051	0.943136
ACVRL1		Wald ratio	1	-0.0308054	-0.130303	0.0686917	0.0507638	0.543959	0.935181
SERPINF2		Wald ratio	1	0.0252388	-0.0565971	0.107075	0.041753	0.545526	0.935181
ACYP1		Wald ratio	1	0.025927	-0.058249	0.110103	0.0429469	0.546044	0.935181
RIDA		Wald ratio	1	-0.0273853	-0.116621	0.0618498	0.0455281	0.547505	0.935181
RET		Wald ratio	1	0.0415791	-0.0940739	0.177232	0.0692107	0.548	0.935181
CRLF1		Wald ratio	1	-0.0275328	-0.117864	0.0627987	0.0460875	0.550239	0.935181
CD300A		Wald ratio	1	0.0149938	-0.0342828	0.0642704	0.0251411	0.550918	0.935181
MPO		Wald ratio	1	-0.0496685	-0.212927	0.11359	0.083295	0.550977	0.935181
SDCBP2		Wald ratio	1	-0.0314126	-0.13591	0.0730848	0.053315	0.555734	0.935181
PSG3		Wald ratio	1	-0.0900277	-0.390797	0.210742	0.153454	0.557421	0.935181
NAXE		Wald ratio	1	0.0154753	-0.036502	0.0674526	0.026519	0.55952	0.935181
IGSF8		Wald ratio	1	0.0291289	-0.0691972	0.127455	0.0501664	0.56148	0.935181
NAGK		Wald ratio	1	0.0183462	-0.0436823	0.0803746	0.0316472	0.56211	0.935181
CAPG		Wald ratio	1	0.0247263	-0.0590362	0.108489	0.042736	0.56287	0.935181
C7		Wald ratio	1	-0.0224966	-0.0994084	0.0544151	0.0392407	0.566443	0.935181
KLK11		Wald ratio	1	-0.0124708	-0.0551423	0.0302006	0.0217711	0.56677	0.935181
KLK11		Wald ratio	1	-0.0197133	-0.0871662	0.0477396	0.0344147	0.56677	0.935181
SCUBE3		Wald ratio	1	0.0225669	-0.0547044	0.0998382	0.0394241	0.567042	0.935181
FAM177A1		Wald ratio	1	0.0125885	-0.0305301	0.055707	0.0219992	0.567171	0.935181
DCC		Wald ratio	1	-0.0130954	-0.0582596	0.0320687	0.023043	0.569827	0.935181
LILRB1		Wald ratio	1	0.0118002	-0.0289684	0.0525687	0.0208003	0.570505	0.935181
RARRES1		IVW	2	0.00777218	-0.0191412	0.0346856	0.0137313	0.571381	0.962595
MRC1		IVW	2	-0.123308	-0.550332	0.303717	0.21787	0.571414	0.962595
HLA-DQA2		IVW	2	0.0476746	-0.11754	0.212889	0.0842933	0.571679	0.962595
PRTG		IVW	2	0.0147409	-0.0366771	0.0661588	0.0262336	0.574179	0.962595
FUT10		Wald ratio	1	0.0109727	-0.0275598	0.0495052	0.0196594	0.576749	0.935181
SELENOF		Wald ratio	1	0.0203994	-0.0512529	0.0920517	0.0365573	0.576837	0.935181
ECM1		Wald ratio	1	-0.0090356	-0.0408653	0.0227941	0.0162397	0.577944	0.935181
SERPINA4		Wald ratio	1	0.0143114	-0.0365093	0.0651321	0.0259289	0.580984	0.935181
GSTO1		Wald ratio	1	-0.00922182	-0.0419974	0.0235538	0.0167222	0.581311	0.935181
DKK3		Wald ratio	1	-0.0360135	-0.164166	0.0921386	0.0653837	0.581769	0.935181
DKK3		Wald ratio	1	-0.0330202	-0.150521	0.0844805	0.0599493	0.581769	0.935181
PRCP		Wald ratio	1	0.0235433	-0.060836	0.107923	0.0430507	0.584465	0.935181
FAS		Wald ratio	1	-0.0207999	-0.0954527	0.0538528	0.0380881	0.584998	0.935181
FAS		Wald ratio	1	-0.0172333	-0.0790852	0.0446186	0.0315571	0.584998	0.935181
IL18R1		Wald ratio	1	-0.0107379	-0.0492804	0.0278047	0.0196646	0.58503	0.935181
IL18R1		Wald ratio	1	-0.00863263	-0.0396186	0.0223533	0.0158092	0.58503	0.935181
ACE		Wald ratio	1	0.0134848	-0.0349243	0.0618939	0.0246985	0.585082	0.935181
GLCE		Wald ratio	1	0.0134788	-0.0350069	0.0619646	0.0247376	0.585842	0.935181
SIGLEC9		IVW	2	0.00618553	-0.0162136	0.0285846	0.0114281	0.588331	0.970063
OXSR1		Wald ratio	1	0.0256948	-0.0673846	0.118774	0.0474895	0.588464	0.935181
ECI1		Wald ratio	1	-0.0292251	-0.135605	0.0771543	0.0542752	0.590258	0.935181
VEGFA		Wald ratio	1	-0.0223998	-0.10407	0.0592704	0.0416685	0.590872	0.935181
CFHR4		IVW	2	0.00951304	-0.0252038	0.0442298	0.0177126	0.591215	0.970063
TCN1		Wald ratio	1	0.0236845	-0.0627757	0.110145	0.0441123	0.591328	0.935181
HIBCH		Wald ratio	1	0.0132724	-0.0353624	0.0619073	0.0248137	0.59273	0.935181
MAN1A2		Wald ratio	1	-0.170807	-0.798711	0.457097	0.320359	0.593914	0.935181
PDCD5		Wald ratio	1	0.0191094	-0.0513641	0.0895829	0.0359558	0.595094	0.935181
LILRA5		Wald ratio	1	-0.0164051	-0.0770028	0.0441927	0.0309172	0.595688	0.935181
LILRA5		Wald ratio	1	-0.0153725	-0.0721562	0.0414112	0.0289713	0.595688	0.935181
LGR5		Wald ratio	1	0.0226132	-0.0609783	0.106205	0.0426487	0.59596	0.935181
WARS1		Wald ratio	1	-0.0273697	-0.12911	0.0743702	0.0519081	0.598004	0.935181
KNG1		Wald ratio	1	-0.0235839	-0.111343	0.0641754	0.0447751	0.59839	0.935181
MYOC		IVW	2	-0.0219144	-0.10349	0.0596617	0.0416204	0.59852	0.970063
TNC		Wald ratio	1	-0.186744	-0.884237	0.51075	0.355864	0.599749	0.935181
INHBB		Wald ratio	1	0.0177114	-0.0487419	0.0841647	0.0339047	0.6014	0.935181
PIP		Wald ratio	1	0.0398489	-0.109724	0.189422	0.0763128	0.601546	0.935181
OXT		Wald ratio	1	0.0321064	-0.08891	0.153123	0.0617431	0.603064	0.935181
AMIGO1		Wald ratio	1	-0.0279007	-0.133155	0.0773539	0.0537013	0.603375	0.935181
F10		Wald ratio	1	0.0294544	-0.0819732	0.140882	0.0568508	0.604389	0.935181
FAS		Wald ratio	1	-0.0241456	-0.115555	0.0672636	0.0466373	0.604646	0.935181
AKR1C4		Wald ratio	1	-0.013474	-0.0646241	0.0376761	0.026097	0.605642	0.935181
CYP2C19		Wald ratio	1	-0.0198881	-0.0955563	0.0557802	0.0386062	0.606447	0.935181
CR1		Wald ratio	1	0.0118593	-0.0332932	0.0570118	0.023037	0.606698	0.935181
CHD1L		Wald ratio	1	-0.0142797	-0.0686501	0.0400907	0.02774	0.606715	0.935181
FCGR3B		Wald ratio	1	0.024106	-0.0682989	0.116511	0.0471454	0.609132	0.935181
IGFLR1		Wald ratio	1	-0.0150454	-0.0727413	0.0426505	0.0294367	0.609273	0.935181
NT5E		Wald ratio	1	0.0159524	-0.0454012	0.077306	0.0313029	0.610321	0.935181
AMY1A		IVW	2	0.0234618	-0.0669848	0.113908	0.0461462	0.611157	0.970063
NTNG1		Wald ratio	1	0.0110756	-0.0316538	0.053805	0.0218007	0.611426	0.935181
HDHD2		Wald ratio	1	-0.017017	-0.0827842	0.0487501	0.0335547	0.612055	0.935181
SNCA		Wald ratio	1	0.0229811	-0.0664009	0.112363	0.0456031	0.614306	0.935181
NADK		Wald ratio	1	0.193197	-0.558576	0.944969	0.383557	0.614474	0.935181
TTC9		Wald ratio	1	-0.0226853	-0.112161	0.0667901	0.0456507	0.619237	0.940466
PRKCSH		Wald ratio	1	-0.0266576	-0.132462	0.0791464	0.0539816	0.621428	0.941832
DEFA3		IVW	2	-0.0121274	-0.0604358	0.0361809	0.0246471	0.622689	0.970063
MANBA		Wald ratio	1	-0.0119479	-0.0598017	0.0359059	0.0244152	0.624586	0.943381
NTAQ1		Wald ratio	1	-0.0205105	-0.102767	0.061746	0.0419676	0.625039	0.943381
ACHE		Wald ratio	1	0.0126195	-0.0384448	0.0636838	0.0260532	0.62812	0.945038
AKR1B1		Wald ratio	1	-0.0211618	-0.106944	0.0646205	0.0437665	0.628729	0.945038
NELL1		IVW	2	0.0103886	-0.0319014	0.0526786	0.0215765	0.630176	0.970063
PTGR1		IVW	2	-0.0104879	-0.0533782	0.0324025	0.0218828	0.631744	0.970063
CCL8		Wald ratio	1	0.00811417	-0.0259386	0.042167	0.0173739	0.640476	0.954971
SCARF1		Wald ratio	1	-0.00916703	-0.0477099	0.0293759	0.0196648	0.641097	0.954971
GPX7		Wald ratio	1	0.0185277	-0.0600018	0.0970571	0.0400661	0.643775	0.954971
SPARCL1		Wald ratio	1	0.0116838	-0.0378811	0.0612487	0.0252882	0.644063	0.954971
SPARCL1		Wald ratio	1	0.0098128	-0.031815	0.0514406	0.0212387	0.644063	0.954971
KLB		IVW	2	-0.00812759	-0.042816	0.0265609	0.0176982	0.646067	0.970063
ALAD		Wald ratio	1	-0.028974	-0.153296	0.095348	0.0634296	0.647822	0.954971
AMY2A		IVW	2	0.0225916	-0.0747861	0.119969	0.0496825	0.649311	0.970063
CSTB		Wald ratio	1	-0.0111063	-0.0589966	0.036784	0.0244338	0.649436	0.954971
SH3BGRL3		Wald ratio	1	0.0186084	-0.0617366	0.0989533	0.0409923	0.649867	0.954971
CPN2		Wald ratio	1	-0.0112845	-0.0602115	0.0376424	0.0249627	0.65123	0.954971
RPIA		Wald ratio	1	-0.020645	-0.110341	0.0690507	0.0457631	0.651897	0.954971
CD7		Wald ratio	1	-0.0121151	-0.0647686	0.0405383	0.026864	0.652004	0.954971
GALNT4		Wald ratio	1	0.00759291	-0.0256056	0.0407914	0.016938	0.653954	0.954971
SPON2		Wald ratio	1	0.0126517	-0.0428472	0.0681506	0.0283158	0.655013	0.954971
LHB		Wald ratio	1	0.0260609	-0.0889828	0.141105	0.0586958	0.657043	0.954971
LZTFL1		Wald ratio	1	-0.023877	-0.129721	0.0819673	0.0540022	0.658382	0.954971
NQO1		Wald ratio	1	-0.0106986	-0.0583044	0.0369072	0.0242887	0.659592	0.954971
AMY2B		IVW	2	0.0275707	-0.0954225	0.150564	0.0627516	0.6604	0.970063
EPHB6		Wald ratio	1	0.0241178	-0.0836159	0.131851	0.0549662	0.660824	0.954971
EPHB6		Wald ratio	1	0.0276894	-0.0959986	0.151377	0.0631061	0.660824	0.954971
MX1		Wald ratio	1	-0.0232481	-0.127139	0.080643	0.0530057	0.660954	0.954971
REG1B		Wald ratio	1	-0.022538	-0.123674	0.0785984	0.0516002	0.66227	0.954971
CMPK1		Wald ratio	1	0.0155467	-0.0543442	0.0854375	0.0356586	0.662847	0.954971
BST1		IVW	2	-0.00589634	-0.0326521	0.0208595	0.0136509	0.665787	0.970063
MGMT		IVW	2	-0.0128785	-0.0715453	0.0457884	0.0299321	0.66701	0.970063
MARCO		Wald ratio	1	-0.0189815	-0.106286	0.0683234	0.0445433	0.670008	0.960544
RNASE3		IVW	2	-0.0375127	-0.210375	0.13535	0.0881953	0.670591	0.970063
SERPINA4		Wald ratio	1	0.0112594	-0.0410258	0.0635446	0.0266761	0.672968	0.960544
TTLL12		Wald ratio	1	0.0130274	-0.0475304	0.0735853	0.0308969	0.673286	0.960544
RNASE3		IVW	2	-0.040193	-0.227922	0.147536	0.0957803	0.674751	0.970063
CHI3L1		Wald ratio	1	0.00844016	-0.0311692	0.0480495	0.0202088	0.676205	0.960544
SH3GLB2		Wald ratio	1	-0.0148673	-0.0848029	0.0550684	0.0356815	0.676922	0.960544
PDHX		Wald ratio	1	-0.0172363	-0.0984342	0.0639617	0.0414275	0.677367	0.960544
GHRL		Wald ratio	1	-0.022579	-0.128953	0.0837949	0.0542724	0.677388	0.960544
ACADM		Wald ratio	1	-0.0183661	-0.105146	0.0684136	0.0442754	0.678277	0.960544
TNFAIP6		Wald ratio	1	0.0118301	-0.0450436	0.0687038	0.0290172	0.6835	0.960544
PPM1F		Wald ratio	1	-0.0157042	-0.0914332	0.0600249	0.0386373	0.684411	0.960544
FN1		Wald ratio	1	0.0137837	-0.0528792	0.0804465	0.0340117	0.685284	0.960544
FN1		Wald ratio	1	0.0135626	-0.052031	0.0791561	0.0334661	0.685284	0.960544
SERPINB8		Wald ratio	1	-0.016715	-0.0988556	0.0654257	0.0419085	0.690008	0.960544
CYB5R2		Wald ratio	1	-0.0145558	-0.0862866	0.0571751	0.0365974	0.690831	0.960544
FCGR3A		IVW	2	0.00671712	-0.026683	0.0401172	0.0170409	0.693451	0.970063
GRAMD1C		Wald ratio	1	0.0103965	-0.0414726	0.0622656	0.0264638	0.694425	0.960544
CFHR5		IVW	2	0.019627	-0.0783614	0.117615	0.0499941	0.694626	0.970063
GHR		Wald ratio	1	-0.0185603	-0.111604	0.0744839	0.0474715	0.695814	0.960544
CCL8		Wald ratio	1	0.0230265	-0.0925016	0.138555	0.0589429	0.69605	0.960544
ESD		Wald ratio	1	0.0128996	-0.0520586	0.0778577	0.0331419	0.697112	0.960544
APOH		Wald ratio	1	0.00731912	-0.0296341	0.0442723	0.0188537	0.697863	0.960544
ADAM23		Wald ratio	1	-0.0149572	-0.0905027	0.0605883	0.0385436	0.697972	0.960544
GGT5		Wald ratio	1	0.0125535	-0.0508826	0.0759896	0.0323653	0.698114	0.960544
PGM1		Wald ratio	1	0.0221339	-0.0899931	0.134261	0.0572077	0.698827	0.960544
SAA4		IVW	2	0.00794421	-0.0323558	0.0482442	0.0205612	0.699224	0.970063
CHN1		Wald ratio	1	0.0151519	-0.0621495	0.0924532	0.0394395	0.700844	0.960544
SAA1		Wald ratio	1	-0.0108623	-0.066563	0.0448385	0.0284187	0.702297	0.960544
SAA2		Wald ratio	1	-0.0121811	-0.0746448	0.0502826	0.0318692	0.702297	0.960544
ENTPD5		IVW	2	-0.00882216	-0.0543407	0.0366963	0.0232237	0.704037	0.970063
ATRN		Wald ratio	1	0.0123307	-0.0518302	0.0764916	0.0327351	0.70641	0.960544
ERO1B		Wald ratio	1	0.0205668	-0.0865091	0.127643	0.0546306	0.706567	0.960544
COL10A1		IVW	2	0.0210698	-0.0887061	0.130846	0.0560081	0.706775	0.970063
ATIC		Wald ratio	1	-0.0131907	-0.0821341	0.0557527	0.0351752	0.70766	0.960544
VEGFA		Wald ratio	1	-0.0118906	-0.0741972	0.050416	0.0317891	0.70837	0.960544
FCN1		Wald ratio	1	0.0124467	-0.0533753	0.0782687	0.0335827	0.710914	0.960544
IL1RL1		Wald ratio	1	0.0108291	-0.0466201	0.0682783	0.0293108	0.711786	0.960544
FUT8		IVW	2	0.0304923	-0.131299	0.192284	0.0825466	0.711833	0.970063
IL1RL2		Wald ratio	1	0.0159363	-0.0686587	0.100531	0.0431607	0.711956	0.960544
GBA		Wald ratio	1	-0.0409308	-0.258682	0.176821	0.111098	0.712559	0.960544
B3GNT8		Wald ratio	1	-0.00566598	-0.035809	0.024477	0.0153791	0.712559	0.960544
TYMP		Wald ratio	1	-0.0146716	-0.0928021	0.0634588	0.0398625	0.712832	0.960544
TNC		Wald ratio	1	0.00939459	-0.0417537	0.0605429	0.0260961	0.718847	0.962916
H6PD		Wald ratio	1	0.0132733	-0.0592646	0.0858113	0.0370092	0.719857	0.962916
FTCD		Wald ratio	1	0.0281926	-0.126262	0.182647	0.0788033	0.720524	0.962916
MSMB		Wald ratio	1	-0.00492514	-0.0319543	0.022104	0.0137904	0.720985	0.962916
HSP90B1		IVW	2	0.00522417	-0.0236575	0.0341058	0.0147355	0.722943	0.970063
GSTP1		Wald ratio	1	0.0111996	-0.0509957	0.073395	0.0317323	0.724133	0.962916
B3GAT1		Wald ratio	1	-0.00703344	-0.0466934	0.0326265	0.0202347	0.728145	0.962916
C3		Wald ratio	1	-0.0154693	-0.102705	0.0717666	0.0445081	0.72817	0.962916
SIGLEC12		Wald ratio	1	-0.0056987	-0.0381084	0.026711	0.0165356	0.73037	0.962916
SVEP1		IVW	2	0.0198131	-0.0929365	0.132563	0.0575253	0.730527	0.970063
C2		Wald ratio	1	-0.0144854	-0.0971908	0.06822	0.0421966	0.731385	0.962916
DKK2		Wald ratio	1	-0.0106249	-0.071571	0.0503212	0.031095	0.732582	0.962916
MMP10		Wald ratio	1	0.0156537	-0.0749741	0.106281	0.0462387	0.734955	0.962916
MMP10		Wald ratio	1	0.0129754	-0.0621464	0.0880973	0.0383275	0.734955	0.962916
IL15RA		Wald ratio	1	0.0102262	-0.0490129	0.0694653	0.030224	0.735103	0.962916
FAM171B		Wald ratio	1	0.0116334	-0.0558006	0.0790673	0.0344051	0.735266	0.962916
IDI2		Wald ratio	1	0.0134647	-0.0647423	0.0916717	0.0399015	0.735779	0.962916
FRZB		IVW	2	-0.00951825	-0.0650642	0.0460277	0.0283398	0.736975	0.970063
SPON1		Wald ratio	1	0.0123896	-0.0599334	0.0847126	0.0368995	0.737047	0.962916
FGL1		Wald ratio	1	-0.00818682	-0.0559765	0.0396028	0.0243825	0.737047	0.962916
TIMP4		Wald ratio	1	-0.00928308	-0.064506	0.0459399	0.028175	0.741793	0.963475
FABP1		Wald ratio	1	-0.0162078	-0.112891	0.0804752	0.0493281	0.74248	0.963475
SIRPG		Wald ratio	1	0.0183535	-0.0920038	0.128711	0.0563047	0.744449	0.963475
IFNLR1		Wald ratio	1	-0.174064	-1.23798	0.889857	0.542817	0.748462	0.963475
LRRC15		Wald ratio	1	-0.0137819	-0.0981498	0.070586	0.0430449	0.748835	0.963475
MMP12		IVW	2	0.00775723	-0.0400183	0.0555327	0.0243753	0.750301	0.970063
GIMAP4		Wald ratio	1	-0.00689798	-0.0496213	0.0358253	0.0217976	0.751657	0.963475
GDF15		Wald ratio	1	0.0131101	-0.0684312	0.0946514	0.0416027	0.752666	0.963475
NUDT2		IVW	2	0.0105306	-0.0549986	0.0760599	0.0334333	0.752781	0.970063
SLAMF6		Wald ratio	1	0.0148478	-0.0775929	0.107289	0.0471636	0.752902	0.963475
PRTFDC1		Wald ratio	1	-0.0172022	-0.126414	0.0920094	0.0557202	0.757531	0.963475
NAAA		Wald ratio	1	0.00684369	-0.0366761	0.0503635	0.022204	0.757916	0.963475
EFNA1		Wald ratio	1	-0.0143085	-0.105634	0.0770165	0.0465944	0.758777	0.963475
CPQ		IVW	2	0.00801743	-0.0432647	0.0592995	0.0261643	0.75928	0.970063
IL27RA		IVW	2	0.0067251	-0.0363222	0.0497724	0.0219629	0.75945	0.970063
COL2A1		Wald ratio	1	0.00683851	-0.0370579	0.0507349	0.0223961	0.760105	0.963475
CA6		Wald ratio	1	-0.0065024	-0.0484667	0.0354619	0.0214104	0.761354	0.963475
CA6		Wald ratio	1	-0.00635079	-0.0473366	0.034635	0.0209111	0.761354	0.963475
GCA		Wald ratio	1	-0.0130747	-0.097516	0.0713666	0.0430823	0.761522	0.963475
NCR3		IVW	2	-0.0231709	-0.172945	0.126603	0.0764153	0.761719	0.970063
L3HYPDH		Wald ratio	1	0.0159964	-0.0875593	0.119552	0.0528345	0.76207	0.963475
CA10		Wald ratio	1	0.0192402	-0.105495	0.143976	0.0636406	0.762404	0.963475
COA4		Wald ratio	1	0.0104195	-0.0576546	0.0784936	0.0347317	0.764177	0.963475
SWAP70		Wald ratio	1	0.010281	-0.057052	0.077614	0.0343536	0.764734	0.963475
PSAPL1		IVW	2	-0.0167444	-0.126962	0.0934734	0.0562336	0.765883	0.970063
SNX11		Wald ratio	1	-0.0108813	-0.0826186	0.0608561	0.0366007	0.76624	0.963475
APOA5		Wald ratio	1	-0.00700474	-0.053612	0.0396026	0.0237792	0.76832	0.963475
SMPDL3A		Wald ratio	1	0.00737525	-0.0420363	0.0567868	0.02521	0.769864	0.963475
SMPDL3A		Wald ratio	1	0.0090504	-0.051584	0.0696848	0.0309359	0.769864	0.963475
ART4		Wald ratio	1	0.00481297	-0.0274493	0.0370753	0.0164604	0.769983	0.963475
KLK8		Wald ratio	1	-0.00747755	-0.0580202	0.0430651	0.0257871	0.771837	0.963475
KLK8		Wald ratio	1	-0.0076051	-0.0590099	0.0437997	0.0262269	0.771837	0.963475
RARRES2		Wald ratio	1	-0.0110278	-0.0864275	0.0643718	0.0384692	0.774368	0.964242
CPNE1		Wald ratio	1	-0.00463163	-0.0364046	0.0271414	0.0162107	0.775097	0.964242
ADAMTS13		IVW	2	-0.0059546	-0.0470483	0.0351391	0.0209662	0.776403	0.970063
NPW		Wald ratio	1	-0.0102986	-0.083141	0.0625438	0.0371645	0.781697	0.970796
HDGF		Wald ratio	1	0.0168672	-0.103902	0.137636	0.0616168	0.784282	0.97235
SAA1		Wald ratio	1	-0.0038272	-0.0317696	0.0241152	0.0142563	0.788348	0.974253
CFHR1		Wald ratio	1	0.0381484	-0.247055	0.323352	0.145512	0.793193	0.974253
LPO		Wald ratio	1	0.020986	-0.136583	0.178555	0.0803923	0.794058	0.974253
GFRA2		IVW	2	0.0080601	-0.0526896	0.0688098	0.0309948	0.794827	0.970063
LILRA6		IVW	2	0.0256713	-0.168264	0.219607	0.0989468	0.795291	0.970063
SH3PXD2B		Wald ratio	1	-0.0131801	-0.113067	0.0867072	0.0509629	0.795928	0.974253
GRAMD1C		Wald ratio	1	-0.0151299	-0.130154	0.0998943	0.0586858	0.796552	0.974253
NRP1		Wald ratio	1	-0.0108425	-0.0939154	0.0722305	0.0423842	0.798094	0.974253
NRP1		Wald ratio	1	-0.00902283	-0.0781541	0.0601084	0.0352711	0.798094	0.974253
IGLL1		Wald ratio	1	0.0151995	-0.102573	0.132972	0.0600879	0.800303	0.974253
FCN3		Wald ratio	1	-0.0116324	-0.102444	0.0791795	0.0463326	0.801765	0.974253
CTSH		IVW	2	-0.00798973	-0.0710518	0.0550723	0.0321745	0.803883	0.970063
MDGA2		IVW	2	-0.00713835	-0.0635875	0.0493108	0.0288006	0.804247	0.970063
CNTN2		IVW	2	0.00649948	-0.0450466	0.0580456	0.026299	0.804802	0.970063
RGMA		Wald ratio	1	0.0274738	-0.191109	0.246057	0.111522	0.805409	0.974253
IL1RAP		Wald ratio	1	0.00356837	-0.0248739	0.0320107	0.0145114	0.805758	0.974253
VWF		Wald ratio	1	-0.020471	-0.183746	0.142804	0.0833034	0.805884	0.974253
CRYZ		IVW	2	0.00448513	-0.0313217	0.0402919	0.0182688	0.806063	0.970063
HCLS1		Wald ratio	1	-0.0116973	-0.105263	0.0818688	0.0477378	0.806431	0.974253
CYB5D2		IVW	2	-0.00594361	-0.0536235	0.0417363	0.0243265	0.806978	0.970063
WFIKKN2		Wald ratio	1	-0.00568585	-0.051574	0.0402023	0.0234123	0.808116	0.974253
TCN2		Wald ratio	1	0.00272472	-0.0196707	0.0251202	0.0114263	0.811523	0.974253
LILRB5		Wald ratio	1	-0.00306771	-0.0287584	0.022623	0.0131075	0.814952	0.974253
CRELD1		Wald ratio	1	-0.0055901	-0.0526039	0.0414237	0.0239866	0.815722	0.974253
PTGR1		Wald ratio	1	0.00705324	-0.0523027	0.0664091	0.0302836	0.815834	0.974253
GPR37		IVW	2	-0.00368259	-0.0348559	0.0274907	0.0159047	0.816895	0.970063
MVB12B		Wald ratio	1	-0.01051	-0.100462	0.0794417	0.0458937	0.818863	0.974253
COL6A1		Wald ratio	1	-0.00675399	-0.0650004	0.0514924	0.0297175	0.820212	0.974253
SCN3B		Wald ratio	1	-0.00655582	-0.0639022	0.0507906	0.0292584	0.822706	0.974253
CRHBP		Wald ratio	1	-0.00562607	-0.0565204	0.0452683	0.0259665	0.828468	0.974253
TREM1		IVW	2	-0.00499413	-0.0503355	0.0403473	0.0231334	0.829078	0.97774
QDPR		Wald ratio	1	0.00935293	-0.0757588	0.0944646	0.0434243	0.829467	0.974253
MSR1		Wald ratio	1	0.00690716	-0.0559658	0.0697801	0.032078	0.829515	0.974253
CD209		Wald ratio	1	0.0144344	-0.116964	0.145832	0.0670398	0.829525	0.974253
CD209		Wald ratio	1	0.0119916	-0.0971694	0.121153	0.0556944	0.829525	0.974253
PDCD1LG2		Wald ratio	1	0.00482637	-0.0391334	0.0487861	0.0224284	0.829619	0.974253
SHMT1		Wald ratio	1	0.00675791	-0.0558156	0.0693315	0.0319253	0.832358	0.974253
EPHB2		Wald ratio	1	0.00900799	-0.075386	0.093402	0.0430582	0.834288	0.974253
EPHB2		Wald ratio	1	0.00939322	-0.07861	0.0973964	0.0448996	0.834288	0.974253
EPS8L3		Wald ratio	1	-0.00934835	-0.0982477	0.079551	0.0453568	0.836707	0.974253
GFRA1		Wald ratio	1	0.00688943	-0.05923	0.0730089	0.0337344	0.838177	0.974253
SPINK6		Wald ratio	1	-0.00544586	-0.0579781	0.0470864	0.0268022	0.838989	0.974253
GZMB		Wald ratio	1	0.00419905	-0.0364207	0.0448188	0.0207243	0.839436	0.974253
CDCP1		Wald ratio	1	0.00863515	-0.0764729	0.0937432	0.0434225	0.842369	0.974253
MANEA		IVW	2	-0.00272449	-0.0298806	0.0244317	0.0138552	0.844109	0.983038
GFRAL		Wald ratio	1	0.0101613	-0.0916959	0.112019	0.051968	0.844977	0.974253
TMEM190		Wald ratio	1	0.00259657	-0.0234371	0.0286302	0.0132825	0.84501	0.974253
CFHR1		IVW	2	0.00592149	-0.0534706	0.0653136	0.0303021	0.845068	0.983038
CPA4		Wald ratio	1	-0.00238418	-0.0266478	0.0218795	0.0123794	0.847278	0.974253
SERPINA3		Wald ratio	1	-0.00873004	-0.0980404	0.0805804	0.0455665	0.848064	0.974253
CNRIP1		Wald ratio	1	-0.00431777	-0.0486231	0.0399876	0.0226048	0.848517	0.974253
BOLA1		Wald ratio	1	-0.00453973	-0.0512081	0.0421287	0.0238104	0.848791	0.974253
CALCB		Wald ratio	1	0.00710988	-0.0665484	0.0807682	0.0375808	0.849945	0.974253
PSG9		Wald ratio	1	0.0150097	-0.140554	0.170574	0.0793694	0.850005	0.974253
IGF2R		Wald ratio	1	0.00512895	-0.0481234	0.0583813	0.0271696	0.850269	0.974253
POGLUT1		Wald ratio	1	-0.00642441	-0.0735809	0.0607321	0.0342635	0.851269	0.974253
GAA		Wald ratio	1	0.00584459	-0.0555563	0.0672455	0.031327	0.852	0.974253
CHIT1		IVW	2	0.0025691	-0.0251209	0.0302591	0.0141276	0.855701	0.988681
POMGNT2		Wald ratio	1	-0.0076348	-0.089938	0.0746684	0.0419914	0.855725	0.974253
PPID		Wald ratio	1	-0.00716693	-0.0848395	0.0705057	0.0396289	0.856484	0.974253
IL17RD		Wald ratio	1	-0.00294604	-0.03517	0.0292779	0.0164408	0.857788	0.974253
NID2		Wald ratio	1	0.00460134	-0.0491004	0.0583031	0.0273989	0.866631	0.974253
CST4		Wald ratio	1	-0.00599185	-0.0768015	0.0648178	0.0361274	0.868272	0.974253
B3GAT3		Wald ratio	1	-0.0404666	-0.520738	0.439804	0.245036	0.86883	0.974253
SIRPA		Wald ratio	1	-0.0018793	-0.0244821	0.0207235	0.0115321	0.870548	0.974253
NUDT9		Wald ratio	1	0.00703475	-0.07871	0.0927795	0.0437473	0.872248	0.974253
FCER2		Wald ratio	1	0.00733573	-0.0823558	0.0970273	0.045761	0.872641	0.974253
CST2		Wald ratio	1	-0.00467269	-0.0619131	0.0525677	0.0292043	0.872881	0.974253
CST1		Wald ratio	1	-0.00360116	-0.0477154	0.040513	0.0225072	0.872881	0.974253
CSF2RB		Wald ratio	1	-0.00267196	-0.0355225	0.0301786	0.0167605	0.873338	0.974253
PSG4		Wald ratio	1	-0.0278389	-0.372634	0.316956	0.175916	0.874258	0.974253
FAM3B		Wald ratio	1	0.00388557	-0.0442566	0.0520278	0.0245624	0.874305	0.974253
CXCL6		Wald ratio	1	0.0473044	-0.546284	0.640893	0.302851	0.875878	0.974253
GLDN		IVW	2	0.0027944	-0.0324136	0.0380024	0.0179633	0.876378	0.995306
LIPG		Wald ratio	1	0.00664565	-0.07802	0.0913113	0.0431967	0.877731	0.974253
CFHR5		Wald ratio	1	-0.00572348	-0.0787809	0.0673339	0.0372742	0.877964	0.974253
ACAT2		Wald ratio	1	-0.00491254	-0.0702856	0.0604605	0.0333536	0.882906	0.974253
PLTP		Wald ratio	1	-0.0031592	-0.0452134	0.038895	0.0214562	0.882943	0.974253
MXRA7		Wald ratio	1	0.00501732	-0.0618535	0.0718882	0.0341178	0.883086	0.974253
FAH		Wald ratio	1	0.00385164	-0.0480914	0.0557947	0.0265016	0.884445	0.974253
NOTCH2		Wald ratio	1	-0.0179264	-0.259996	0.224143	0.123505	0.884595	0.974253
PSG5		Wald ratio	1	-0.00719707	-0.104789	0.0903951	0.0497919	0.885072	0.974253
FCN2		Wald ratio	1	0.0028239	-0.0357355	0.0413833	0.0196732	0.885863	0.974253
FETUB		Wald ratio	1	0.00519123	-0.0666454	0.0770279	0.0366513	0.887366	0.974253
F13B		IVW	2	-0.00318648	-0.047369	0.040996	0.0225421	0.887588	0.995306
NPPB		Wald ratio	1	-0.00738139	-0.110463	0.0956997	0.0525924	0.888383	0.974253
ART3		Wald ratio	1	-0.00556484	-0.0834018	0.0722722	0.0397128	0.888559	0.974253
ART3		Wald ratio	1	-0.00592997	-0.088874	0.0770141	0.0423184	0.888559	0.974253
COL11A2		Wald ratio	1	-0.00923709	-0.139044	0.12057	0.0662282	0.889076	0.974253
GSN		Wald ratio	1	-0.0192454	-0.295356	0.256865	0.140873	0.891334	0.974253
SNX15		Wald ratio	1	0.00459517	-0.0616028	0.0707931	0.0337745	0.891778	0.974253
CLYBL		Wald ratio	1	-0.00844378	-0.131294	0.114407	0.0626788	0.892837	0.974253
TPSB2		Wald ratio	1	0.00373055	-0.0515148	0.0589759	0.0281864	0.894705	0.974253
ICOSLG		Wald ratio	1	-0.00421859	-0.0671506	0.0587134	0.0321081	0.895469	0.974253
LCT		Wald ratio	1	0.00540659	-0.0754209	0.0862341	0.0412385	0.895692	0.974253
GZMB		Wald ratio	1	-0.00299001	-0.0478223	0.0418423	0.0228736	0.895998	0.974253
LRP4		Wald ratio	1	-0.00372685	-0.0600155	0.0525618	0.0287187	0.896748	0.974253
SLITRK3		Wald ratio	1	0.00552424	-0.0802296	0.0912781	0.043752	0.899524	0.974253
FBLN7		IVW	2	-0.00548334	-0.0907732	0.0798065	0.0435152	0.899724	0.995306
CHMP4A		Wald ratio	1	-0.00640975	-0.107654	0.0948341	0.051655	0.901246	0.974253
FCN1		Wald ratio	1	0.00351395	-0.0527327	0.0597606	0.0286973	0.902543	0.974253
MGP		Wald ratio	1	0.00350592	-0.0531848	0.0601966	0.0289238	0.903523	0.974253
GALNT14		Wald ratio	1	0.00178669	-0.0279796	0.0315529	0.0151869	0.906347	0.974253
QSOX1		Wald ratio	1	-0.00343949	-0.0608662	0.0539872	0.0292993	0.90655	0.974253
ITIH2		Wald ratio	1	-0.0035035	-0.0624579	0.0554509	0.0300788	0.907274	0.974253
GKN2		Wald ratio	1	0.00284903	-0.0451742	0.0508722	0.0245016	0.907431	0.974253
C1S		IVW	2	-0.0055576	-0.102975	0.0918598	0.0497028	0.910969	0.995306
C1S		IVW	2	-0.00544571	-0.102078	0.0911866	0.0493022	0.912048	0.995306
LRRN1		Wald ratio	1	0.00517418	-0.0867745	0.0971228	0.0469126	0.912176	0.976945
LRIG3		Wald ratio	1	-0.00422826	-0.0797897	0.0713332	0.0385517	0.912665	0.976945
PDGFRL		Wald ratio	1	-0.00505972	-0.0968452	0.0867258	0.0468293	0.913959	0.976945
P4HB		Wald ratio	1	-0.00520934	-0.102207	0.0917886	0.0494887	0.916167	0.977536
HAVCR1		Wald ratio	1	0.00316139	-0.0583251	0.0646479	0.0313707	0.919729	0.977536
C4BPA		Wald ratio	1	0.00247595	-0.0465379	0.0514898	0.0250071	0.92113	0.977536
SERPINF1		Wald ratio	1	-0.00340287	-0.0708401	0.0640344	0.0344067	0.921217	0.977536
SERPINF1		Wald ratio	1	-0.00348351	-0.072519	0.0655519	0.0352222	0.921217	0.977536
CLEC12A		IVW	2	-0.00113878	-0.0238663	0.0215887	0.0115956	0.921767	0.995306
RNASE6		IVW	2	0.00211008	-0.0403938	0.044614	0.0216857	0.922486	0.995306
DPEP1		Wald ratio	1	-0.00262993	-0.0557626	0.0505027	0.0271085	0.922715	0.977702
ENPP5		Wald ratio	1	-0.00187922	-0.0412113	0.0374529	0.0200674	0.925391	0.978218
NT5C		Wald ratio	1	0.00273973	-0.0549863	0.0604658	0.0294521	0.925885	0.978218
CNTN6		IVW	2	0.0031992	-0.0673009	0.0736993	0.0359694	0.929128	0.995306
ENPP2		Wald ratio	1	0.00404172	-0.0857384	0.0938219	0.0458062	0.92969	0.980816
SEMA5A		Wald ratio	1	-0.00130337	-0.0314208	0.0288141	0.015366	0.932403	0.982084
COLGALT1		Wald ratio	1	0.00392309	-0.0883481	0.0961942	0.0470771	0.933586	0.982084
KDR		Wald ratio	1	0.00357407	-0.0831998	0.0903479	0.0442724	0.935657	0.982845
AKR7A3		Wald ratio	1	0.00434773	-0.10765	0.116345	0.0571416	0.93935	0.98448
BCAN		Wald ratio	1	-0.00457962	-0.123662	0.114503	0.0607563	0.939915	0.98448
COCH		IVW	2	0.00175062	-0.0456613	0.0491626	0.0241898	0.942307	0.995306
ITPA		Wald ratio	1	-0.00116338	-0.0327064	0.0303796	0.0160934	0.942372	0.985637
KREMEN1		IVW	2	0.00224733	-0.0595533	0.0640479	0.0315309	0.94318	0.995306
ADGRE2		Wald ratio	1	0.00270755	-0.0759294	0.0813445	0.0401209	0.946196	0.985827
CNDP1		Wald ratio	1	-0.00399207	-0.120707	0.112723	0.0595484	0.946551	0.985827
PATE4		Wald ratio	1	-0.00509468	-0.154212	0.144023	0.0760805	0.94661	0.985827
IL1RAP		IVW	2	0.000966025	-0.0273535	0.0292855	0.0144487	0.946694	0.995306
CNTN5		Wald ratio	1	-0.00264819	-0.0867335	0.0814371	0.0429006	0.950779	0.987733
CCDC134		Wald ratio	1	-0.00208946	-0.0696624	0.0654835	0.034476	0.951673	0.987733
KLK7		Wald ratio	1	0.00362341	-0.115613	0.12286	0.0608351	0.952505	0.987733
CHIT1		IVW	2	0.000909893	-0.0303704	0.0321902	0.0159593	0.954535	0.995306
APOL1		Wald ratio	1	0.00132958	-0.0446009	0.0472601	0.0234339	0.954754	0.988659
ATP1B2		Wald ratio	1	0.00216177	-0.0783426	0.0826662	0.0410737	0.958025	0.990639
BPNT2		Wald ratio	1	-0.00160714	-0.0664446	0.0632303	0.0330803	0.961252	0.991596
SEMA6D		IVW	2	-0.00193824	-0.0805283	0.0766518	0.040097	0.961446	0.995306
FCN1		Wald ratio	1	0.00154614	-0.0620929	0.0651852	0.0324689	0.96202	0.991596
INPP5D		Wald ratio	1	-0.0020911	-0.0917472	0.087565	0.0457429	0.963538	0.991596
GPNMB		Wald ratio	1	0.0023823	-0.10221	0.106975	0.0533636	0.964392	0.991596
NUDT15		IVW	2	0.00307166	-0.140253	0.146396	0.0731246	0.966494	0.995306
ABO		IVW	2	0.000654051	-0.0370724	0.0383805	0.0192482	0.972893	0.995306
TNC		Wald ratio	1	-0.000575987	-0.0340677	0.0329157	0.0170876	0.97311	0.996344
TNC		Wald ratio	1	0.000544144	-0.031096	0.0321843	0.0161429	0.97311	0.996344
TNC		Wald ratio	1	0.000659068	-0.0376636	0.0389817	0.0195524	0.97311	0.996344
SELL		Wald ratio	1	0.00124234	-0.077489	0.0799737	0.040169	0.975327	0.997214
APOB		Wald ratio	1	0.00918759	-0.682652	0.701027	0.352979	0.979234	0.997712
SPAG7		Wald ratio	1	-0.00144133	-0.120563	0.11768	0.0607763	0.98108	0.997712
SPINT3		Wald ratio	1	0.000664846	-0.0544997	0.0558294	0.0281452	0.981154	0.997712
HDGF		Wald ratio	1	0.0010437	-0.0930559	0.0951433	0.04801	0.982656	0.997712
CHST9		Wald ratio	1	0.00763713	-0.696471	0.711745	0.359239	0.983039	0.997712
LY9		Wald ratio	1	-0.000694166	-0.0723507	0.0709623	0.0365594	0.984851	0.997712
ME1		Wald ratio	1	-0.000668243	-0.0722136	0.0708772	0.0365028	0.985394	0.997712
KREMEN1		IVW	2	0.000563129	-0.065006	0.0661322	0.0334536	0.98657	0.995306
PROS1		IVW	2	-0.00113161	-0.154973	0.15271	0.0784907	0.988497	0.995306
S100A12		Wald ratio	1	-0.000608104	-0.0894035	0.0881873	0.0453038	0.98929	0.999524
ADAMTS5		IVW	2	0.000349885	-0.0529352	0.0536349	0.0271863	0.989732	0.995306
CD300LG		Wald ratio	1	-0.000534706	-0.0835382	0.0824688	0.0423487	0.989926	0.999524
SIGLEC5		IVW	2	0.000266387	-0.0415743	0.0421071	0.0213473	0.990044	0.995306
LACTB2		Wald ratio	1	-0.000553946	-0.105172	0.104064	0.0533767	0.99172	0.99995
APOL1		Wald ratio	1	0.000225562	-0.0621108	0.0625619	0.0318042	0.994341	1
C1QL1		Wald ratio	1	0.000302496	-0.0910029	0.0916079	0.0465844	0.994819	1
RMDN1		IVW	2	0.000220525	-0.0732551	0.0736962	0.0374876	0.995306	0.995306
B4GALT6		Wald ratio	1	7.16E-05	-0.0475063	0.0476495	0.0242745	0.997646	1

## Sheet: ST3
Supplement Table 3. Colocalization results of cross-protein from decode and PPD.
Proteins	nsnps	PPH0	PPH1	PPH2	PPH3	PHH4
SRA1	4410	6.20663e-43	0.000522525	1.07328e-40	0.0894479	0.91003
C5	5502	4.10001e-37	0.0149378	2.69859e-35	0.983188	0.00187385
AGT	7009	4.35887e-86	0.317363	1.90635e-86	0.138254	0.544383
PGP	6667	1.0525e-101	0.102984	3.5041e-102	0.033423	0.863593
CDON	7695	7.11225e-277	0.348921	1.18004e-276	0.578843	0.072236
TLR3	8409	1.0252e-300	0.730192	3.66453e-301	0.260996	0.00881239
SERPINA10	7546	2.42168e-298	0.783221	6.21551e-299	0.201006	0.0157732
IL1R2	5959	3.66067e-295	0.796352	8.08477e-296	0.175851	0.0277974
C8G	6359	2.15843e-300	0.713068	7.25756e-301	0.239717	0.0472152
MANSC4	6687	2.77022e-300	0.776074	7.67448e-301	0.21499	0.0089359
AKR1A1	4806	1.99538e-285	0.862055	2.85801e-286	0.123459	0.0144857
TIRAP	7380	1.06747e-63	0.338558	1.77772e-63	0.563724	0.0977179
ROR1	7438	8.03707e-162	0.498447	3.41594e-162	0.211561	0.289991
CRNN	5339	2.44668e-52	0.715871	6.44361e-53	0.188437	0.0956914
PIGR	4839	3.10326e-58	0.641038	7.04901e-59	0.145397	0.213565
STX7	6498	2.66928e-39	0.737291	8.02247e-40	0.221551	0.0411579
TMEM106B	10539	4.06788e-39	0.518719	2.87467e-39	0.366451	0.114829
IL10RB	5618	5.38348e-13	0.761469	1.26294e-13	0.178577	0.0599544

## Sheet: ST4
Supplement Table 3. Significant transcriptomic SMR results of SRA1 on PPD in different tissues.
	topSNP	topSNP_chr	topSNP_bp	A1	A2	Freq	b_SMR	se_SMR	p_SMR	p_HEIDI	nsnp_HEIDI
Blood	rs1019933	5	139844953	A	G	0.286299	0.0918171	0.0381141	0.0159961	0.0269061	20
Adipose_Subcutaneous	rs250431	5	139940233	A	G	0.712679	0.141035	0.0572001	0.0136771	0.0273286	8
Brain_Anterior_cingulate_cortex_BA24	rs250431	5	139940233	A	G	0.712679	0.090961	0.0380484	0.016818	0.0385771	3
Brain_Caudate_basal_ganglia	rs3733681	5	139914758	G	A	0.713701	0.0951868	0.0394926	0.015942	NA	NA
Brain_Frontal_Cortex_BA9	rs250431	5	139940233	A	G	0.712679	0.101232	0.0422619	0.0166044	0.963415	3
Brain_Hippocampus	rs2563253	5	139962167	G	A	0.521472	0.239607	0.0654943	0.000253762	NA	NA
Brain_Hypothalamus	rs3733681	5	139914758	G	A	0.713701	0.0893072	0.0367056	0.0149716	0.0980814	7
Brain_Putamen_basal_ganglia	rs1835148	5	139980775	C	T	0.277096	0.10706	0.04776	0.0249851	NA	NA
Brain_Substantia_nigra	rs2878916	5	139971517	A	T	0.273006	0.0699347	0.0310147	0.0241401	0.591703	3

## Sheet: ST5
Supplement Table 5. Significant DNA methylation SMR results of SRA1 on PPD in blood and brain.
Exposure	Outcome	topSNP	topSNP_chr	topSNP_bp	A1	A2	Freq	b_SMR	se_SMR	p_SMR	p_HEIDI	nsnp_HEIDI
Blood
cg01226231	SRA1	rs10463297	5	140556654	C	T	0.390449	0.214823	0.0176793	5.65905e-34	2.44136e-17	20
cg01226231	PPD	rs10463297	5	140556654	C	T	0.390449	0.104858	0.0233552	7.13189e-06	0.0501947	20
brain
cg01226231	SRA1	rs10463297	5	140556654	C	T	0.390449	0.214823	0.0176793	5.65905e-34	2.44136e-17	20
cg01226231	PPD	rs17118938	5	140571273	C	G	0.698744	0.705712	0.1869	0.00015945	0.287179	6

## Sheet: ST6
Supplement Table 6. MR-PheWAS analysis results of SRA1
Exposure	Outcome	method	nsnp	b	lo_ci	up_ci	se	pval	p_fdr
SRA1	Cardiomyopathy	IVW	2	0.986098	0.350928	1.62127	0.324066	0.00234318	0.613545
	Dyschromia and Vitiligo	IVW	2	1.09263	0.374966	1.8103	0.366156	0.00284449	0.613545
	Primary/intrinsic cardiomyopathies	IVW	2	0.977738	0.328705	1.62677	0.331139	0.00315062	0.613545
	Benign neoplasm of skin	IVW	2	0.383871	0.12857	0.639171	0.130255	0.00320808	0.613545
	Stricture/obstruction of ureter	IVW	2	1.08244	0.336775	1.82811	0.380443	0.00443808	0.658773
	Malignant neoplasm of rectum, rectosigmoid junction, and anus	IVW	2	-0.704135	-1.19766	-0.210613	0.251797	0.00516685	0.658773
	Breast conditions, congenital or relating to hormones	IVW	2	0.957545	0.225824	1.68927	0.373327	0.0103207	0.916819
	Epilepsy, recurrent seizures, convulsions	IVW	2	0.411113	0.0928916	0.729334	0.162358	0.0113368	0.916819
	Constipation	IVW	2	0.283423	0.0604834	0.506363	0.113745	0.0127117	0.916819
	Disturbance of skin sensation	IVW	2	-0.518696	-0.932814	-0.104578	0.211285	0.01409	0.916819
	Chronic pancreatitis	IVW	2	1.23058	0.217103	2.24405	0.517078	0.017319	0.916819
	Symptoms involving nervous and musculoskeletal systems	IVW	2	-0.621224	-1.14588	-0.096567	0.267682	0.0203002	0.916819
	Other specified gastritis	IVW	2	0.297662	0.0429609	0.552362	0.129949	0.0219867	0.916819
	Other dyschromia	IVW	2	0.937376	0.129537	1.74521	0.412163	0.0229487	0.916819
	Inflammation of eyelids	IVW	2	0.525186	0.0640471	0.986324	0.235275	0.0256002	0.916819
	Septal Deviations/Turbinate Hypertrophy	IVW	2	0.378332	0.0455324	0.711132	0.169796	0.0258699	0.916819
	Scar conditions and fibrosis of skin	IVW	2	0.524056	0.0622954	0.985816	0.235592	0.0261201	0.916819
	Symptoms involving head and neck	IVW	2	0.468599	0.0550992	0.882099	0.210969	0.0263393	0.916819
	Other open wound of head and face	IVW	2	-0.527633	-0.998325	-0.0569417	0.240149	0.0280126	0.916819
	Open wounds of head; neck; and trunk	IVW	2	-0.414393	-0.786467	-0.0423204	0.189833	0.0290406	0.916819
	Cancer of esophagus	IVW	2	-0.918463	-1.76071	-0.0762186	0.429717	0.0325679	0.916819
	Inflammatory and toxic neuropathy	IVW	2	0.658981	0.0519229	1.26604	0.309724	0.0333667	0.916819
	Swelling, mass, or lump in head and neck [Space-occupying lesion, intracranial NOS]	IVW	2	0.809374	0.0637063	1.55504	0.380443	0.0333825	0.916819
	Elevated blood pressure reading without diagnosis of hypertension	IVW	2	0.661159	0.0519679	1.27035	0.310812	0.0334034	0.916819
	Malignant neoplasm of bladder	IVW	2	0.529888	0.0369901	1.02279	0.251478	0.0351097	0.916819
	Fetal distress and abnormal forces of labor	IVW	2	0.539793	0.0297841	1.0498	0.260209	0.0380364	0.916819
	Frequency of urination and polyuria	IVW	2	0.368166	0.0169827	0.719349	0.179175	0.0399	0.916819
	Viral Enteritis	IVW	2	-0.817148	-1.59713	-0.0371658	0.39795	0.0400345	0.916819
	Cough	IVW	2	0.447158	0.0184184	0.875897	0.218745	0.0409338	0.916819
	Hematuria	IVW	2	0.199167	0.00812241	0.390212	0.0974717	0.0410197	0.916819
	Urinary incontinence	IVW	2	-0.248558	-0.487975	-0.00914132	0.122151	0.0418674	0.916819
	Other disorders of bone and cartilage	IVW	2	0.376329	0.0104685	0.74219	0.186664	0.0437914	0.916819
	Cancer within the respiratory system	IVW	2	0.454193	0.00957462	0.898812	0.226846	0.0452624	0.916819
	Cholelithiasis with other cholecystitis	IVW	2	-0.322461	-0.639381	-0.00554097	0.161694	0.0461227	0.916819
	Other paralytic syndromes	IVW	2	0.89092	0.0144359	1.76741	0.447186	0.0463402	0.916819
	Infertility, female	IVW	2	0.624933	0.0037553	1.24611	0.316927	0.0486268	0.916819
	Osteoarthrosis, localized, primary	IVW	2	0.239993	0.00117247	0.478813	0.121847	0.0488817	0.916819
	Occlusion and stenosis of precerebral arteries	IVW	2	0.655975	0.000693625	1.31126	0.334327	0.0497538	0.916819
	Nontoxic nodular goiter	IVW	2	-0.667123	-1.33655	0.00230186	0.341543	0.0507887	0.916819
	Aphakia and other disorders of lens	IVW	2	-0.535618	-1.07418	0.00294067	0.274775	0.0512599	0.916819
	Diabetes mellitus	IVW	2	0.173525	-0.00114698	0.348196	0.0891182	0.0515192	0.916819
	Peritonitis and retroperitoneal infections	IVW	2	0.753901	-0.0056028	1.5134	0.387502	0.0517099	0.916819
	Spinal stenosis	IVW	2	0.377519	-0.00291991	0.757959	0.194102	0.0517802	0.916819
	Complications of cardiac/vascular device, implant, and graft	IVW	2	0.529808	-0.00875125	1.06837	0.274775	0.0538363	0.916819
	Strabismus and other disorders of binocular eye movements	IVW	2	-0.569648	-1.15652	0.0172253	0.299425	0.0571095	0.916819
	Cancer of bronchus; lung	IVW	2	0.477959	-0.0155624	0.97148	0.251797	0.0576705	0.916819
	Back pain	IVW	2	0.213371	-0.0089388	0.43568	0.113423	0.059946	0.916819
	Benign neoplasm of other endocrine glands and related structures	IVW	2	-0.733548	-1.49945	0.0323532	0.390766	0.0604899	0.916819
	Hypovolemia	IVW	2	-0.410575	-0.839315	0.018164	0.218745	0.0605232	0.916819
	Injuries to the nervous system	IVW	2	0.593843	-0.0273349	1.21502	0.316927	0.0609648	0.916819
	Cystitis and urethritis	IVW	2	0.394454	-0.0184066	0.807314	0.210643	0.0611213	0.916819
	Skull and face fracture and other intercranial injury	IVW	2	-0.392604	-0.80732	0.022113	0.21159	0.0635261	0.934567
	Hypertrophy of breast (Gynecomastia)	IVW	2	0.718027	-0.0619554	1.49801	0.39795	0.0711822	0.99562
	Malignant neoplasm of other and ill-defined sites within the digestive organs and peritoneum	IVW	2	-0.303291	-0.634352	0.0277705	0.168909	0.07256	0.99562
	Ulcerative colitis	IVW	2	0.576412	-0.0576489	1.21047	0.323501	0.0747824	0.99562
	Poisoning by psychotropic agents	IVW	2	-0.458133	-0.968734	0.0524681	0.260511	0.0786463	0.99562
	Type 2 diabetes	IVW	2	0.155063	-0.0202339	0.33036	0.0894372	0.08296	0.99562
	Subjective visual disturbances	IVW	2	-0.793064	-1.69753	0.111397	0.46146	0.0856876	0.99562
	Benign neoplasm of brain, cranial nerves, meninges	IVW	2	0.705323	-0.102516	1.51316	0.412163	0.0870307	0.99562
	Pelvic inflammatory disease (PID)	IVW	2	0.650618	-0.0950496	1.39629	0.380443	0.0872362	0.99562
	Hydronephrosis	IVW	2	0.442439	-0.066963	0.95184	0.259899	0.0886898	0.99562
	Joint effusions	IVW	2	0.526991	-0.0800669	1.13405	0.309724	0.0888512	0.99562
	Cyst of kidney, acquired	IVW	2	-0.599057	-1.28993	0.0918178	0.352487	0.0892223	0.99562
	Inflammation of the eye	IVW	2	0.340978	-0.0566419	0.738598	0.202867	0.0928031	0.99562
	Other complications of pregnancy NEC	IVW	2	0.435833	-0.0735686	0.945234	0.259899	0.0935555	0.99562
	Other chronic nonalcoholic liver disease	IVW	2	-0.692586	-1.50235	0.117182	0.413147	0.0936664	0.99562
	Noninfectious gastroenteritis	IVW	2	0.213748	-0.037702	0.465199	0.128291	0.0956892	0.99562
	Diseases of nail, NOS	IVW	2	-0.536718	-1.17189	0.0984517	0.324066	0.0976816	0.99562
	Cystitis	IVW	1	0.371972	-0.0688581	0.812803	0.224913	0.0981588	0.926963
	Esophageal bleeding (varices/hemorrhage)	IVW	2	0.463188	-0.089118	1.01549	0.281789	0.10023	0.99562
	Hypertension	IVW	2	-0.0845747	-0.18607	0.0169206	0.0517833	0.102418	0.99562
	Essential hypertension	IVW	2	-0.0845747	-0.18607	0.0169206	0.0517833	0.102418	0.99562
	Urinary tract infection	IVW	2	0.171471	-0.0349589	0.377901	0.105321	0.103509	0.99562
	Allergic rhinitis	IVW	2	0.57779	-0.119569	1.27515	0.355796	0.104389	0.99562
	Normal delivery	IVW	2	-0.445543	-0.984102	0.0930161	0.274775	0.104914	0.99562
	Other disorders of bladder	IVW	2	0.195025	-0.0424941	0.432543	0.121183	0.107542	0.99562
	Unspecified monoarthritis	IVW	2	-0.154985	-0.345536	0.0355655	0.0972198	0.110897	0.99562
	Other symptoms involving abdomen and pelvis	IVW	2	0.317289	-0.0803311	0.714909	0.202867	0.117812	0.99562
	Ingrowing nail	IVW	2	-0.582829	-1.31455	0.148892	0.373327	0.118483	0.99562
	Atrial fibrillation and flutter	IVW	2	-0.15155	-0.342729	0.0396277	0.0975399	0.120249	0.99562
	Peripheral enthesopathies and allied syndromes	IVW	2	0.160316	-0.0420649	0.362696	0.103255	0.120516	0.99562
	Duodenitis	IVW	2	0.213589	-0.056358	0.483536	0.137728	0.120949	0.99562
	Infection/inflammation of internal prosthetic device; implant; and graft	IVW	2	0.364045	-0.0964531	0.824543	0.234948	0.121269	0.99562
	Manlignant and unknown neoplasms of brain and nervous system	IVW	2	0.701315	-0.189203	1.59183	0.454346	0.122692	0.99562
	Benign neoplasm of brain and other parts of nervous system	IVW	2	0.682055	-0.18565	1.54976	0.442707	0.123403	0.99562
	Vascular hamartomas and non-neoplastic nevi	IVW	2	0.696872	-0.193646	1.58739	0.454346	0.125081	0.99562
	Staphylococcus infections	IVW	2	-0.311628	-0.709866	0.086609	0.203182	0.125094	0.99562
	Poisoning by analgesics, antipyretics, and antirheumatics	IVW	2	-0.211612	-0.482795	0.0595718	0.138359	0.126155	0.99562
	Arterial embolism and thrombosis	IVW	2	0.763198	-0.216192	1.74259	0.499689	0.126675	0.99562
	Ovarian cyst	IVW	2	0.258554	-0.0755473	0.592655	0.17046	0.129316	0.99562
	Gastritis and duodenitis	IVW	2	0.109483	-0.0320346	0.251	0.0722028	0.129437	0.99562
	Diseases of sebaceous glands	IVW	2	-0.184813	-0.42423	0.0546038	0.122151	0.130284	0.99562
	Symptoms affecting skin	IVW	2	-0.232081	-0.534422	0.0702606	0.154256	0.132448	0.99562
	Gout	IVW	2	0.354174	-0.113585	0.821933	0.238653	0.137794	0.99562
	Ankylosing spondylitis	IVW	2	-0.68463	-1.58909	0.219831	0.46146	0.13791	0.99562
	Bronchitis	IVW	2	0.683585	-0.220876	1.58805	0.46146	0.138512	0.99562
	Pain in joint	IVW	2	0.192409	-0.0622918	0.44711	0.129949	0.138701	0.99562
	Late pregnancy and failed induction	IVW	2	0.490042	-0.165239	1.14532	0.334327	0.142715	0.99562
	Suppurative and unspecified otitis media	IVW	2	-0.582253	-1.36224	0.197729	0.39795	0.143432	0.99562
	Psoriasis	IVW	2	-0.356531	-0.834171	0.12111	0.243694	0.143461	0.99562
	Sebaceous cyst	IVW	2	-0.176972	-0.416389	0.0624452	0.122151	0.147397	0.99562
	Diseases of hair and hair follicles	IVW	2	-0.281747	-0.663634	0.100141	0.194841	0.148167	0.99562
	Abnormal results of function study of liver	IVW	2	-0.281389	-0.663746	0.100967	0.19508	0.149181	0.99562
	Nonspecific abnormal findings on radiological and other examination of other intrathoracic organs (echocardiogram, etc)	IVW	2	-0.782892	-1.84756	0.281774	0.543197	0.149509	0.99562
	Psoriasis and related disorders	IVW	2	-0.349248	-0.826266	0.127771	0.243377	0.151285	0.99562
	Umbilical hernia	IVW	2	-0.277228	-0.657667	0.103212	0.194102	0.153217	0.99562
	Strabismus (not specified as paralytic)	IVW	2	-0.542096	-1.28776	0.203571	0.380443	0.154183	0.99562
	Amblyopia	IVW	2	0.704529	-0.268437	1.6775	0.496411	0.155828	0.99562
	Hearing loss	IVW	2	-0.25256	-0.602541	0.0974209	0.178562	0.157241	0.99562
	Noninflammatory disorders of ovary, fallopian tube, and broad ligament	IVW	2	-0.606303	-1.44855	0.235942	0.429717	0.158263	0.99562
	Convulsions	IVW	2	0.425573	-0.167333	1.01848	0.302503	0.159475	0.99562
	Nerve root and plexus disorders	IVW	2	0.48029	-0.189134	1.14971	0.341543	0.159654	0.99562
	Nonspecific findings on examination of blood	IVW	2	-0.204807	-0.490633	0.0810192	0.14583	0.160192	0.99562
	Other tests	IVW	2	-0.214651	-0.515691	0.086389	0.153592	0.162251	0.99562
	Hemorrhage in early pregnancy	IVW	2	0.498323	-0.205178	1.20182	0.358929	0.165027	0.99562
	Premature beats	IVW	2	0.686949	-0.286018	1.65992	0.496411	0.166411	0.99562
	Opiates and related narcotics causing adverse effects in therapeutic use	IVW	2	-0.47196	-1.14138	0.197464	0.341543	0.167019	0.99562
	Empyema and pneumothorax	IVW	2	-0.461092	-1.11637	0.194189	0.334327	0.167844	0.99562
	Rheumatoid arthritis and other inflammatory polyarthropathies	IVW	2	0.244755	-0.104344	0.593854	0.178112	0.169391	0.99562
	Protein-calorie malnutrition	IVW	2	-0.488531	-1.18589	0.208829	0.355796	0.169732	0.99562
	Meniere's disease	IVW	2	-0.656502	-1.59529	0.282282	0.478971	0.170484	0.99562
	Cardiac pacemaker in situ	IVW	1	0.354671	-0.153979	0.863322	0.259516	0.17173	0.926963
	Cyst or abscess of Bartholin's gland	IVW	2	0.576577	-0.25166	1.40481	0.42257	0.172425	0.99562
	Secondary malignant neoplasm of liver	IVW	2	-0.308754	-0.754013	0.136505	0.227173	0.17411	0.99562
	Cancer of bladder	IVW	2	0.319746	-0.141392	0.780885	0.235275	0.174136	0.99562
	Atherosclerosis of the extremities	IVW	2	-0.549949	-1.34391	0.244013	0.405083	0.174584	0.99562
	Umbilical cord complications during labor and delivery	IVW	2	0.686753	-0.306035	1.67954	0.506524	0.175158	0.99562
	Nonspecific abnormal findings in stool contents	IVW	2	0.386387	-0.172444	0.945219	0.285118	0.175359	0.99562
	Cardiac arrest and ventricular fibrillation	IVW	2	0.462384	-0.207041	1.13181	0.341543	0.175798	0.99562
	Malunion and nonunion of fracture	IVW	2	0.437227	-0.197943	1.0724	0.324066	0.177276	0.99562
	Adverse effects of sedatives or other central nervous system depressants and anesthetics	IVW	2	-0.645644	-1.58443	0.29314	0.478971	0.177665	0.99562
	Pulmonary collapse; interstitial and compensatory emphysema	IVW	2	-0.347357	-0.856134	0.161421	0.25958	0.180848	0.99562
	Polyp of female genital organs	IVW	2	-0.15079	-0.37373	0.0721495	0.113745	0.184943	0.99562
	Abnormal findings on mammogram or breast exam	IVW	2	-0.387447	-0.960369	0.185476	0.292307	0.185013	0.99562
	Other peripheral nerve disorders	IVW	2	0.139974	-0.0670847	0.347034	0.105642	0.185177	0.99562
	Disorders of calcium/phosphorus metabolism	IVW	2	-0.438142	-1.08717	0.210892	0.331139	0.185791	0.99562
	Epilepsy	IVW	2	0.551119	-0.271582	1.37382	0.419745	0.189188	0.99562
	Other abnormal blood chemistry	IVW	2	-0.191212	-0.477673	0.0952491	0.146154	0.190773	0.99562
	Osteoporosis	IVW	2	-0.190685	-0.477146	0.0957763	0.146154	0.191999	0.99562
	Decubitus ulcer	IVW	2	-0.63349	-1.58846	0.321481	0.48723	0.193537	0.99562
	Thyrotoxicosis with or without goiter	IVW	2	0.347002	-0.177654	0.871659	0.267682	0.194864	0.99562
	Hyperhidrosis	IVW	2	-0.675747	-1.70127	0.349777	0.523226	0.19653	0.99562
	Stricture of artery	IVW	2	-0.502394	-1.2683	0.263507	0.390766	0.19856	0.99562
	Hemorrhage from gastrointestinal ulcer	IVW	2	0.595961	-0.314626	1.50655	0.464585	0.199569	0.99562
	Other disorders of liver	IVW	2	-0.197234	-0.49894	0.104471	0.153931	0.200084	0.99562
	Secondary malignancy of brain/spine	IVW	2	0.56827	-0.306391	1.44293	0.446256	0.20287	0.99562
	Lump or mass in breast	IVW	2	-0.390535	-0.997079	0.216008	0.309461	0.206954	0.99562
	Complications of labor and delivery NEC	IVW	2	0.531972	-0.296208	1.36015	0.422541	0.208036	0.99562
	Nonspecific abnormal findings on radiological and other examination of musculoskeletal system	IVW	2	-0.551969	-1.41433	0.310392	0.43998	0.209649	0.99562
	Hyposmolality and/or hyponatremia	IVW	2	0.33581	-0.188847	0.860466	0.267682	0.209657	0.99562
	Unspecified diffuse connective tissue disease	IVW	2	-0.274834	-0.704834	0.155165	0.219387	0.210302	0.99562
	Cardiomegaly	IVW	2	0.284339	-0.161541	0.730219	0.22749	0.211337	0.99562
	Other hypertrophic and atrophic conditions of skin	IVW	2	0.212307	-0.121157	0.545771	0.170135	0.212076	0.99562
	Palpitations	IVW	2	0.23065	-0.135825	0.597125	0.186977	0.217363	0.99562
	Benign neoplasm of colon	IVW	2	0.163805	-0.0969422	0.424551	0.133034	0.218211	0.99562
	Abnormal findings examination of lungs	IVW	2	0.289217	-0.17128	0.749715	0.234948	0.218328	0.99562
	Electrolyte imbalance	IVW	2	0.217113	-0.133481	0.567707	0.178874	0.224835	0.99562
	Urethral stricture (not specified as infectious)	IVW	2	0.263469	-0.164938	0.691875	0.218575	0.228051	0.99562
	Cervicalgia	IVW	2	0.330095	-0.208464	0.868654	0.274775	0.229624	0.99562
	Crystal arthropathies	IVW	2	-0.552571	-1.45703	0.35189	0.46146	0.231135	0.99562
	Carcinoma in situ of skin	IVW	2	0.531837	-0.344647	1.40832	0.447186	0.234323	0.99562
	Nevus, non-neoplastic	IVW	2	0.558354	-0.366374	1.48308	0.4718	0.236629	0.99562
	Irregular menstrual cycle	IVW	2	-0.307663	-0.817672	0.202346	0.260209	0.237059	0.99562
	Displacement of intervertebral disc	IVW	2	0.602911	-0.398127	1.60395	0.510734	0.237809	0.99562
	Other forms of chronic heart disease	IVW	2	0.324076	-0.214483	0.862635	0.274775	0.23823	0.99562
	Other specified cardiac dysrhythmias	IVW	2	0.237967	-0.159653	0.635587	0.202867	0.240788	0.99562
	Cystic mastopathy	IVW	2	-0.445642	-1.19131	0.300026	0.380443	0.241447	0.99562
	Inflammatory bowel disease and other gastroenteritis and colitis	IVW	2	0.275692	-0.185619	0.737004	0.235363	0.241458	0.99562
	Osteoporosis NOS	IVW	2	-0.180676	-0.483624	0.122273	0.154566	0.242434	0.99562
	Sarcoidosis	IVW	2	-0.576198	-1.54284	0.390441	0.493183	0.242676	0.99562
	Alcohol-related disorders	IVW	2	-0.243524	-0.65465	0.167602	0.209758	0.245653	0.99562
	Disorders of parathyroid gland	IVW	2	-0.58912	-1.58489	0.406653	0.508048	0.246221	0.99562
	Benign neoplasm of unspecified sites	IVW	2	-0.272708	-0.733846	0.188431	0.235275	0.246414	0.99562
	Obesity	IVW	2	0.131358	-0.0915814	0.354298	0.113745	0.248151	0.99562
	Foreign body injury	IVW	2	-0.380334	-1.02937	0.268699	0.331139	0.250737	0.99562
	Congenital anomalies of genital organs	IVW	2	-0.490815	-1.33306	0.35143	0.429717	0.253378	0.99562
	Regional enteritis	IVW	2	-0.312385	-0.850944	0.226174	0.274775	0.25559	0.99562
	Aortic valve disease	IVW	2	-0.528816	-1.44077	0.383135	0.465282	0.255726	0.99562
	Other disorders of urethra and urinary tract	IVW	2	0.203153	-0.147441	0.553747	0.178874	0.25607	0.99562
	Disorders of sweat glands	IVW	2	-0.459829	-1.25379	0.334133	0.405083	0.256313	0.99562
	Other acute and subacute forms of ischemic heart disease	IVW	2	-0.385752	-1.05518	0.283673	0.341543	0.258713	0.99562
	Other non-epithelial cancer of skin	IVW	2	-0.128072	-0.350381	0.0942374	0.113423	0.258834	0.99562
	Secondary malignant neoplasm of digestive systems	IVW	2	-0.329464	-0.902386	0.243458	0.292307	0.259694	0.99562
	Senile cataract	IVW	2	-0.146334	-0.401035	0.108367	0.129949	0.26013	0.99562
	Subarachnoid hemorrhage	IVW	2	0.493355	-0.365911	1.35262	0.438401	0.26044	0.99562
	Noninflammatory disorders of vagina	IVW	2	0.342337	-0.253937	0.93861	0.304221	0.260467	0.99562
	Benign mammary dysplasias	IVW	2	-0.228079	-0.625699	0.169541	0.202867	0.260896	0.99562
	Congenital anomalies of urinary system	IVW	2	0.447295	-0.332687	1.22728	0.39795	0.261014	0.99562
	Crushing or internal injury to organs	IVW	2	-0.40999	-1.12766	0.307676	0.366156	0.262836	0.99562
	Osteoporosis, osteopenia and pathological fracture	IVW	2	-0.153573	-0.42352	0.116375	0.137728	0.264833	0.99562
	Other headache syndromes	IVW	2	-0.143538	-0.398839	0.111762	0.130255	0.270472	0.99562
	Gout and other crystal arthropathies	IVW	2	0.213827	-0.166612	0.594267	0.194102	0.270625	0.99562
	Ulceration of the lower GI tract	IVW	2	0.482323	-0.376206	1.34085	0.438025	0.27084	0.99562
	Fracture of ribs	IVW	2	-0.452097	-1.25994	0.355741	0.412163	0.272689	0.99562
	Other intestinal obstruction	IVW	2	0.221846	-0.175135	0.618827	0.202541	0.273379	0.99562
	Tachycardia NOS	IVW	2	-0.26663	-0.744876	0.211615	0.244003	0.27451	0.99562
	Other disorders of cervical region	IVW	2	-0.544973	-1.53202	0.44207	0.503593	0.279178	0.99562
	Psoriatic arthropathy	IVW	2	-0.463681	-1.30593	0.378564	0.429717	0.280571	0.99562
	Cancer, suspected or other	IVW	2	0.112426	-0.0927691	0.317621	0.104691	0.282877	0.99562
	Disease of tricuspid valve	IVW	2	-0.401774	-1.13546	0.331907	0.374327	0.283126	0.99562
	Other aneurysm	IVW	2	0.294565	-0.243994	0.833124	0.274775	0.283709	0.99562
	Open wounds of extremities	IVW	2	0.190715	-0.159266	0.540696	0.178562	0.285491	0.99562
	Visual disturbances	IVW	2	-0.216298	-0.613279	0.180683	0.202541	0.285557	0.99562
	Shortness of breath	IVW	2	-0.163083	-0.464788	0.138623	0.153931	0.289395	0.99562
	Periapical abscess	IVW	2	0.548844	-0.467338	1.56503	0.51846	0.28978	0.99562
	Symptoms of the muscles	IVW	2	-0.465024	-1.32739	0.397337	0.43998	0.290548	0.99562
	Miscarriage; stillbirth	IVW	2	0.179694	-0.154407	0.513795	0.17046	0.291803	0.99562
	Arterial embolism and thrombosis of lower extremity artery	IVW	2	0.51038	-0.442374	1.46313	0.486099	0.293741	0.99562
	Dyspareunia	IVW	2	0.368598	-0.320376	1.05757	0.351518	0.294366	0.99562
	Diseases of the jaws	IVW	2	-0.390172	-1.12189	0.341549	0.373327	0.295967	0.99562
	Viral hepatitis	IVW	2	0.468067	-0.411045	1.34718	0.448527	0.296686	0.99562
	Anorexia	IVW	2	-0.415142	-1.19512	0.364841	0.39795	0.296856	0.99562
	Parkinson's disease	IVW	2	-0.356082	-1.02551	0.313342	0.341543	0.297148	0.99562
	Schizophrenia and other psychotic disorders	IVW	2	-0.41455	-1.19453	0.365433	0.39795	0.297545	0.99562
	Respiratory abnormalities	IVW	2	-0.491472	-1.4162	0.433255	0.4718	0.297552	0.99562
	Superficial injury without mention of infection	IVW	2	0.216065	-0.190601	0.62273	0.207482	0.297706	0.99562
	Mechanical complication of unspecified genitourinary device, implant, and graft	IVW	2	0.344496	-0.304537	0.993529	0.331139	0.298184	0.99562
	Other disorders of the kidney and ureters	IVW	1	0.224913	-0.198962	0.648789	0.216263	0.29834	0.926963
	Bundle branch block	IVW	2	0.210604	-0.186377	0.607585	0.202541	0.29843	0.99562
	Symptoms involving female genital tract	IVW	2	-0.184069	-0.533863	0.165725	0.178466	0.302357	0.99562
	Other disorders of middle ear and mastoid	IVW	2	0.417027	-0.376935	1.21099	0.405083	0.303251	0.99562
	Pericarditis	IVW	2	0.33183	-0.303339	0.967	0.324066	0.305855	0.99562
	Migraine	IVW	2	0.223012	-0.206367	0.652392	0.219071	0.308682	0.99562
	Overweight, obesity and other hyperalimentation	IVW	2	0.115552	-0.107388	0.338492	0.113745	0.309682	0.99562
	Cardiac arrest	IVW	2	0.386455	-0.359213	1.13212	0.380443	0.309723	0.99562
	Hemorrhage or hematoma complicating a procedure	IVW	2	0.233118	-0.217553	0.68379	0.229934	0.310655	0.99562
	Otitis media and Eustachian tube disorders	IVW	2	0.246714	-0.230926	0.724355	0.243694	0.31135	0.99562
	Calculus of lower urinary tract	IVW	2	0.708459	-0.663783	2.0807	0.700124	0.311583	0.99562
	Acute periodontitis	IVW	2	-0.596716	-1.76263	0.569196	0.594853	0.315797	0.99562
	Carditis	IVW	2	0.259741	-0.248395	0.767876	0.259253	0.316401	0.99562
	Labyrinthitis	IVW	1	0.441176	-0.423529	1.30588	0.441176	0.317311	0.926963
	Cancer of stomach	IVW	2	-0.816854	-2.42177	0.788065	0.818836	0.318483	0.99562
	Cancer of mouth	IVW	2	-0.452723	-1.34324	0.437795	0.454346	0.319042	0.99562
	Torus fracture	IVW	2	0.282955	-0.275877	0.841787	0.285118	0.320997	0.99562
	Nephritis; nephrosis; renal sclerosis	IVW	2	-0.295995	-0.882869	0.290879	0.299425	0.322887	0.99562
	Placenta previa and abruptio placenta	IVW	2	0.331024	-0.326523	0.988571	0.335483	0.323786	0.99562
	Neurological disorders	IVW	2	0.188905	-0.186733	0.564543	0.191652	0.324296	0.99562
	Symptoms involving digestive system	IVW	2	0.0880307	-0.0878446	0.263906	0.0897323	0.326575	0.99562
	Chronic tonsillitis and adenoiditis	IVW	2	-0.339975	-1.02343	0.343476	0.348699	0.329571	0.99562
	Urinary calculus	IVW	2	0.140407	-0.145419	0.426234	0.14583	0.33564	0.99562
	Other disorders of gallbladder	IVW	2	-0.297013	-0.904072	0.310045	0.309724	0.337578	0.99562
	Early onset of delivery	IVW	2	0.450551	-0.474177	1.37528	0.4718	0.339597	0.99562
	Other disorders of arteries and arterioles	IVW	2	-0.312887	-0.955468	0.329693	0.327847	0.339897	0.99562
	Chronic pharyngitis and nasopharyngitis	IVW	2	0.356028	-0.375694	1.08775	0.373327	0.340255	0.99562
	Chronic pulmonary heart disease	IVW	2	0.998392	-1.0556	3.05239	1.04796	0.34074	0.99562
	Chronic sinusitis	IVW	2	0.21562	-0.229639	0.660879	0.227173	0.342546	0.99562
	Periodontitis (acute or chronic)	IVW	2	-0.314156	-0.963189	0.334877	0.331139	0.342767	0.99562
	Nontoxic multinodular goiter	IVW	2	-0.590413	-1.81567	0.63484	0.625129	0.344932	0.99562
	Adverse drug events and drug allergies	IVW	2	-0.415385	-1.27775	0.446976	0.43998	0.345119	0.99562
	Known or suspected fetal abnormality affecting management of mother	IVW	2	0.18382	-0.19792	0.565561	0.194765	0.34527	0.99562
	Hyperpotassemia	IVW	2	0.351645	-0.380076	1.08337	0.373327	0.346233	0.99562
	Hypothyroidism NOS	IVW	2	0.104375	-0.113418	0.322168	0.111119	0.347571	0.99562
	Hypothyroidism	IVW	2	0.0996509	-0.108949	0.308251	0.106429	0.34911	0.99562
	Bacterial enteritis	IVW	2	0.24234	-0.267599	0.752278	0.260173	0.351617	0.99562
	Uterine leiomyoma	IVW	2	0.1099	-0.127619	0.347419	0.121183	0.364464	0.99562
	Type 2 diabetes with ophthalmic manifestations	IVW	2	0.434591	-0.505903	1.37509	0.479844	0.365099	0.99562
	Edema	IVW	2	-0.257161	-0.815993	0.301671	0.285118	0.367087	0.99562
	Nausea and vomiting	IVW	2	-0.0952707	-0.302919	0.112377	0.105943	0.368512	0.99562
	Rheumatoid arthritis	IVW	2	0.159384	-0.18996	0.508727	0.178236	0.371201	0.99562
	Other diseases of lung	IVW	2	-0.366755	-1.17459	0.441083	0.412163	0.373556	0.99562
	Prolapse of vaginal vault after hysterectomy	IVW	2	0.451438	-0.5496	1.45248	0.510734	0.37675	0.99562
	Symptoms involving skin and other integumentary tissue	IVW	2	-0.242004	-0.780563	0.296555	0.274775	0.378461	0.99562
	Cardiac and circulatory congenital anomalies	IVW	2	0.206869	-0.255671	0.669408	0.23599	0.380703	0.99562
	Cardiac congenital anomalies	IVW	2	0.206802	-0.255891	0.669495	0.236068	0.381015	0.99562
	Cardiac shunt/ heart septal defect	IVW	2	0.419189	-0.519594	1.35797	0.478971	0.381472	0.99562
	Benign neoplasm of uterus	IVW	2	0.0993779	-0.123562	0.322318	0.113745	0.382286	0.99562
	Cardiac pacemaker/device in situ	IVW	2	0.204909	-0.255589	0.665407	0.234948	0.383128	0.99562
	Ileostomy status	IVW	2	0.48395	-0.610201	1.5781	0.558241	0.385985	0.99562
	Congenital anomalies of great vessels	IVW	2	0.238154	-0.300405	0.776713	0.274775	0.386094	0.99562
	Enthesopathy	IVW	2	0.1052	-0.132989	0.343388	0.121525	0.386674	0.99562
	Hammer toe (acquired)	IVW	2	0.230068	-0.293288	0.753424	0.267018	0.388897	0.99562
	Retinal detachment with retinal defect	IVW	2	-0.266641	-0.873699	0.340417	0.309724	0.389294	0.99562
	Disorders of iron metabolism	IVW	2	0.382892	-0.493592	1.25938	0.447186	0.391873	0.99562
	Functional digestive disorders	IVW	2	0.0691987	-0.0895937	0.227991	0.0810165	0.393033	0.99562
	Ascites (non malignant)	IVW	2	-0.248718	-0.82164	0.324204	0.292307	0.394837	0.99562
	Chronic liver disease and cirrhosis	IVW	2	-0.388482	-1.29035	0.513384	0.460136	0.398514	0.99562
	Transient cerebral ischemia	IVW	2	0.212306	-0.280592	0.705203	0.251478	0.398541	0.99562
	Cholesteatoma	IVW	2	0.396373	-0.528354	1.3211	0.4718	0.400835	0.99562
	Anal and rectal polyp	IVW	2	-0.115064	-0.385011	0.154883	0.137728	0.40347	0.99562
	Other diseases of respiratory system, not elsewhere classified	IVW	2	0.101537	-0.136848	0.339922	0.121625	0.403809	0.99562
	E. coli	IVW	2	0.183022	-0.246977	0.613021	0.219387	0.404145	0.99562
	Orthostatic hypotension	IVW	2	-0.26264	-0.883818	0.358537	0.316927	0.407269	0.99562
	Abnormal glucose	IVW	2	0.472653	-0.651073	1.59638	0.57333	0.409712	0.99562
	Heart valve replaced	IVW	2	-0.246159	-0.833032	0.340715	0.299425	0.411018	0.99562
	Hyperparathyroidism	IVW	2	-0.550707	-1.86805	0.766634	0.672113	0.412577	0.99562
	Acquired absence of breast	IVW	2	-0.192722	-0.654482	0.269038	0.235592	0.413339	0.99562
	Malignant neoplasm, other	IVW	2	0.108367	-0.152389	0.369122	0.133039	0.415328	0.99562
	stress incontinence, female	IVW	2	-0.190577	-0.650116	0.268963	0.234459	0.416312	0.99562
	Superficial cellulitis and abscess	IVW	2	-0.111906	-0.381853	0.158041	0.137728	0.416495	0.99562
	Diseases of the salivary glands	IVW	2	0.348066	-0.494179	1.19031	0.429717	0.417946	0.99562
	Cellulitis and abscess of fingers/toes	IVW	2	0.393565	-0.559189	1.34632	0.486099	0.418147	0.99562
	Cancer of kidney and renal pelvis	IVW	2	-0.287205	-0.984564	0.410154	0.355796	0.41954	0.99562
	Other congenital musculoskeletal anomalies	IVW	2	0.376358	-0.54837	1.30109	0.4718	0.425041	0.99562
	Other acquired deformities of limbs	IVW	2	0.227387	-0.331445	0.786219	0.285118	0.42515	0.99562
	Psoriasis vulgaris	IVW	2	-0.227334	-0.786166	0.331498	0.285118	0.425258	0.99562
	Epistaxis or throat hemorrhage	IVW	2	0.186675	-0.273823	0.647173	0.234948	0.426882	0.99562
	Agorophobia, social phobia, and panic disorder	IVW	2	0.456208	-0.671466	1.58388	0.575344	0.427818	0.99562
	Acute upper respiratory infections of multiple or unspecified sites	IVW	2	-0.186292	-0.648052	0.275469	0.235592	0.429097	0.99562
	Dislocation	IVW	2	0.19904	-0.294481	0.692561	0.251797	0.429248	0.99562
	Acute tonsillitis	IVW	2	0.367053	-0.543534	1.27764	0.464585	0.429489	0.99562
	Primary angle-closure glaucoma	IVW	2	-0.343021	-1.19918	0.513136	0.436815	0.43229	0.99562
	Gram negative septicemia	IVW	2	-0.326076	-1.144	0.491845	0.417306	0.434578	0.99562
	Retinal detachments and defects	IVW	2	0.158374	-0.239247	0.555994	0.202867	0.434994	0.99562
	Disorders of muscle, ligament, and fascia	IVW	2	0.222065	-0.336456	0.780586	0.28496	0.435811	0.99562
	Anemia of chronic disease	IVW	2	-0.340359	-1.19652	0.515797	0.436815	0.435871	0.99562
	Diffuse diseases of connective tissue	IVW	2	-0.17681	-0.621948	0.268328	0.227111	0.436264	0.99562
	Pilonidal cyst	IVW	2	0.760645	-1.17742	2.69871	0.98881	0.441744	0.99562
	Ill-defined descriptions and complications of heart disease	IVW	2	-0.311034	-1.105	0.482928	0.405083	0.44259	0.99562
	Blood in stool	IVW	2	0.172429	-0.27283	0.617688	0.227173	0.44784	0.99562
	Cancer of larynx, pharynx, nasal cavities	IVW	2	0.350018	-0.554443	1.25448	0.46146	0.448151	0.99562
	Bladder neck obstruction	IVW	2	0.234565	-0.37196	0.841089	0.309451	0.44845	0.99562
	Alcoholism	IVW	2	-0.1292	-0.463449	0.205049	0.170535	0.448683	0.99562
	Colorectal cancer	IVW	2	-0.182643	-0.655336	0.29005	0.24117	0.448857	0.99562
	Other symptoms	IVW	2	-0.250487	-0.89952	0.398547	0.331139	0.449386	0.99562
	Extrapyramidal disease and abnormal movement disorders	IVW	2	-0.292375	-1.05188	0.467129	0.387502	0.450542	0.99562
	Internal derangement of knee	IVW	2	-0.0733317	-0.263883	0.117219	0.0972198	0.450676	0.99562
	Acidosis	IVW	2	-0.267849	-0.965209	0.42951	0.355796	0.451559	0.99562
	Osteoarthrosis	IVW	2	0.0582316	-0.093626	0.210089	0.0774784	0.4523	0.99562
	Hemorrhage of rectum and anus	IVW	2	0.0788038	-0.126953	0.284561	0.104978	0.452852	0.99562
	Secondary hypothyroidism	IVW	2	-0.260838	-0.944289	0.422613	0.348699	0.454442	0.99562
	Fracture of lower limb	IVW	2	-0.102411	-0.372358	0.167536	0.137728	0.457135	0.99562
	Coronary atherosclerosis	IVW	2	-0.0657136	-0.240385	0.108958	0.0891182	0.460894	0.99562
	Cervical cancer	IVW	1	0.624037	-1.03698	2.28505	0.847458	0.461509	0.926963
	Congestive heart failure; nonhypertensive	IVW	2	-0.119219	-0.436803	0.198366	0.162033	0.461873	0.99562
	Other upper respiratory disease	IVW	2	0.291583	-0.488187	1.07135	0.397842	0.463612	0.99562
	Polymyalgia Rheumatica	IVW	2	-0.250175	-0.919599	0.41925	0.341543	0.463874	0.99562
	Cholelithiasis with acute cholecystitis	IVW	2	0.290887	-0.489046	1.07082	0.397925	0.464773	0.99562
	Other anemias	IVW	2	-0.103646	-0.383668	0.176377	0.142868	0.468168	0.99562
	Acid-base balance disorder	IVW	2	-0.247744	-0.917169	0.421681	0.341543	0.468227	0.99562
	Delirium dementia and amnestic and other cognitive disorders	IVW	2	0.19343	-0.331928	0.718788	0.26804	0.470512	0.99562
	Chronic glomerulonephritis, NOS	IVW	2	-0.353483	-1.31786	0.610893	0.492029	0.472498	0.99562
	Fracture of neck of femur	IVW	2	-0.196553	-0.735112	0.342006	0.274775	0.47441	0.99562
	Osteoarthrosis, generalized	IVW	2	0.447245	-0.778798	1.67329	0.625532	0.47462	0.99562
	Excessive or frequent menstruation	IVW	2	0.0867548	-0.152066	0.325575	0.121847	0.476467	0.99562
	Chondrocalcinosis	IVW	2	-0.362545	-1.36322	0.638131	0.510549	0.477637	0.99562
	Effects radiation NOS	IVW	2	0.175578	-0.309279	0.660436	0.247376	0.477851	0.99562
	Other disorders of male genital organs	IVW	2	-0.15545	-0.584829	0.27393	0.219071	0.477961	0.99562
	Raynaud's syndrome	IVW	2	0.241228	-0.428197	0.910652	0.341543	0.480009	0.99562
	Disorders of other cranial nerves	IVW	2	0.218737	-0.388321	0.825795	0.309724	0.480043	0.99562
	Peptic ulcer (excl. esophageal)	IVW	2	0.099664	-0.177627	0.376955	0.141475	0.481145	0.99562
	Inguinal hernia	IVW	2	-0.0683322	-0.258883	0.122219	0.0972198	0.482141	0.99562
	Pernicious anemia	IVW	2	-0.296654	-1.12489	0.531583	0.42257	0.482664	0.99562
	Otitis media	IVW	2	0.192853	-0.345706	0.731412	0.274775	0.482768	0.99562
	Other diseases of blood and blood-forming organs	IVW	2	-0.141612	-0.540337	0.257112	0.203431	0.486353	0.99562
	Blindness and low vision	IVW	2	0.298961	-0.543284	1.14121	0.429717	0.486606	0.99562
	Intestinal obstruction without mention of hernia	IVW	2	0.124397	-0.226786	0.475581	0.179175	0.487508	0.99562
	Cerebral ischemia	IVW	2	0.146665	-0.268051	0.561382	0.21159	0.488211	0.99562
	Disorders of menstruation and other abnormal bleeding from female genital tract	IVW	2	0.074408	-0.136919	0.285735	0.10782	0.490123	0.99562
	Pulmonary heart disease	IVW	2	0.365925	-0.677931	1.40978	0.53258	0.492032	0.99562
	Personal history of diseases of digestive system	IVW	2	0.0667053	-0.123846	0.257256	0.0972198	0.492632	0.99562
	Disorder of skin and subcutaneous tissue NOS	IVW	2	0.162296	-0.301514	0.626107	0.236638	0.492813	0.99562
	Other disorders of eye	IVW	2	-0.126443	-0.492304	0.239417	0.186664	0.49816	0.99562
	Psychogenic and somatoform disorders	IVW	2	-0.341039	-1.32808	0.646003	0.503593	0.498271	0.99562
	Type 1 diabetes	IVW	2	0.153616	-0.291002	0.598235	0.226846	0.49829	0.99562
	Other retinal disorders	IVW	2	0.126213	-0.239647	0.492074	0.186664	0.498943	0.99562
	Missed abortion/Hydatidiform mole	IVW	2	0.226003	-0.429278	0.881284	0.334327	0.499044	0.99562
	Sleep disorders	IVW	2	0.139878	-0.266799	0.546554	0.207488	0.500217	0.99562
	Acute appendicitis	IVW	2	0.152964	-0.292916	0.598844	0.22749	0.501329	0.99562
	Cancer of other lymphoid, histiocytic tissue	IVW	2	0.278275	-0.538473	1.09502	0.416708	0.504266	0.99562
	Delirium due to conditions classified elsewhere	IVW	2	0.302072	-0.588446	1.19259	0.454346	0.506146	0.99562
	Angina pectoris	IVW	2	0.0644655	-0.126085	0.255016	0.0972198	0.507273	0.99562
	Disturbances in tooth eruption	IVW	2	-0.15617	-0.61793	0.305591	0.235592	0.507406	0.99562
	Disorders of tooth development	IVW	2	-0.155889	-0.617028	0.305249	0.235275	0.507597	0.99562
	Other disorders of soft tissues	IVW	2	-0.0966816	-0.383748	0.190385	0.146462	0.509182	0.99562
	Noninfectious disorders of lymphatic channels	IVW	2	-0.287882	-1.14404	0.568275	0.436815	0.509865	0.99562
	Acute gastritis	IVW	2	-0.219978	-0.875259	0.435303	0.334327	0.510557	0.99562
	Benign neoplasm of breast	IVW	2	-0.193082	-0.775374	0.38921	0.297088	0.515746	0.99562
	Cholelithiasis and cholecystitis	IVW	2	-0.132623	-0.53268	0.267434	0.204111	0.515848	0.99562
	Unstable angina (intermediate coronary syndrome)	IVW	2	0.105159	-0.213062	0.42338	0.162358	0.51718	0.99562
	Prurigo and Lichen	IVW	2	-0.266464	-1.0743	0.541375	0.412163	0.517955	0.99562
	Abnormal heart sounds	IVW	2	0.484981	-0.990129	1.96009	0.752607	0.519315	0.99562
	Acquired toe deformities	IVW	2	0.142898	-0.293753	0.579549	0.222781	0.521245	0.99562
	Acquired foot deformities	IVW	2	0.109154	-0.225245	0.443553	0.170612	0.522316	0.99562
	Paralytic ileus	IVW	2	-0.321596	-1.30864	0.665446	0.503593	0.523081	0.99562
	Osteoarthritis; localized	IVW	2	0.056898	-0.118399	0.232195	0.0894372	0.52466	0.99562
	Bipolar	IVW	2	-0.327283	-1.346	0.69143	0.519751	0.528897	0.99562
	Malignant neoplasm of kidney, except pelvis	IVW	2	-0.230461	-0.948126	0.487205	0.366156	0.529083	0.99562
	Antepartum hemorrhage, abruptio placentae, and placenta previa	IVW	2	-0.254003	-1.04796	0.539959	0.405083	0.530634	0.99562
	Intestinal infection due to C. difficile	IVW	2	0.284614	-0.605904	1.17513	0.454346	0.531036	0.99562
	Cholelithiasis	IVW	2	-0.114722	-0.47498	0.245535	0.183805	0.532527	0.99562
	Inflammatory diseases of female pelvic organs	IVW	2	0.0909906	-0.196076	0.378057	0.146462	0.534431	0.99562
	Coagulation defects	IVW	2	-0.235969	-0.981636	0.509699	0.380443	0.535095	0.99562
	Melanomas of skin, dx or hx	IVW	2	0.140451	-0.304168	0.58507	0.226846	0.53582	0.99562
	Melanomas of skin	IVW	2	0.140451	-0.304168	0.58507	0.226846	0.53582	0.99562
	Irregular menstrual bleeding	IVW	2	0.115676	-0.250799	0.482152	0.186977	0.536136	0.99562
	Complication due to other implant and internal device	IVW	2	-0.124709	-0.522329	0.272911	0.202867	0.538732	0.99562
	Irregular menstrual cycle/bleeding	IVW	2	0.0597905	-0.131388	0.250969	0.0975399	0.539886	0.99562
	Aortic aneurysm	IVW	2	0.213036	-0.472339	0.898411	0.349681	0.542373	0.99562
	Diseases of white blood cells	IVW	2	0.166814	-0.37163	0.705259	0.274717	0.543703	0.99562
	Heart failure NOS	IVW	2	-0.108301	-0.458282	0.24168	0.178562	0.544169	0.99562
	Facial nerve disorders [CN7]	IVW	1	0.250865	-0.562976	1.06471	0.415225	0.545733	0.926963
	Early or threatened labor; hemorrhage in early pregnancy	IVW	2	0.211629	-0.47712	0.900378	0.351402	0.547014	0.99562
	Mucous polyp of cervix	IVW	2	-0.117331	-0.499687	0.265026	0.19508	0.54754	0.99562
	Polyp of corpus uteri	IVW	2	-0.0781027	-0.333403	0.177198	0.130255	0.548765	0.99562
	Other diseases of respiratory system, NEC	IVW	2	0.0727518	-0.166069	0.311572	0.121847	0.550458	0.99562
	Type 2 diabetes with neurological manifestations	IVW	2	0.284136	-0.654648	1.22292	0.478971	0.553034	0.99562
	Other and unspecified disc disorder	IVW	2	0.153777	-0.354649	0.662202	0.259401	0.553305	0.99562
	Large cell lymphoma	IVW	2	-0.550473	-2.37637	1.27543	0.931582	0.554587	0.99562
	Noninflammatory disorders of cervix	IVW	2	0.129077	-0.299663	0.557816	0.218745	0.555137	0.99562
	Occlusion of cerebral arteries	IVW	2	-0.105177	-0.455771	0.245417	0.178874	0.556537	0.99562
	Dementias	IVW	2	0.35419	-0.838135	1.54652	0.608329	0.560409	0.99562
	Other disorders of biliary tract	IVW	2	0.25833	-0.613082	1.12974	0.444598	0.561212	0.99562
	Ischemic Heart Disease	IVW	2	0.042259	-0.100654	0.185172	0.0729149	0.562207	0.99562
	Other biliary tract disease	IVW	2	-0.176334	-0.773047	0.42038	0.304446	0.562457	0.99562
	Contracture of palmar fascia [Dupuytren's disease]	IVW	2	0.323492	-0.776231	1.42322	0.561084	0.564244	0.99562
	Cataract	IVW	2	-0.051093	-0.225087	0.122901	0.0887727	0.56492	0.99562
	Acute renal failure	IVW	2	-0.0974973	-0.43221	0.237215	0.170772	0.568052	0.99562
	Hallux valgus (Bunion)	IVW	2	0.0825549	-0.203271	0.368381	0.14583	0.571322	0.99562
	Irritable Bowel Syndrome	IVW	2	0.0873489	-0.2156	0.390297	0.154566	0.571988	0.99562
	Malignant neoplasm of ovary and other uterine adnexa	IVW	2	0.141929	-0.350969	0.634826	0.251478	0.572497	0.99562
	Complications of surgical and medical procedures	IVW	2	-0.0680147	-0.306203	0.170174	0.121525	0.575699	0.99562
	Fever of unknown origin	IVW	2	-0.14662	-0.660745	0.367506	0.262309	0.57619	0.99562
	Hemorrhoids	IVW	2	-0.0437012	-0.197664	0.110262	0.0785527	0.577986	0.99562
	Atherosclerosis	IVW	2	0.175725	-0.445452	0.796903	0.316927	0.579261	0.99562
	Intracranial hemorrhage (injury)	IVW	2	-0.299965	-1.36215	0.762216	0.541929	0.579912	0.99562
	Respiratory failure, insufficiency, arrest	IVW	2	0.234393	-0.595984	1.06477	0.423662	0.580089	0.99562
	Obstetrical/birth trauma	IVW	2	0.0988428	-0.252341	0.450026	0.179175	0.581185	0.99562
	Varicose veins of lower extremity	IVW	2	-0.0625431	-0.284852	0.159766	0.113423	0.58135	0.99562
	Pain and other symptoms associated with female genital organs	IVW	2	0.116463	-0.297655	0.530582	0.211285	0.581487	0.99562
	Disorders of uterus, NEC	IVW	2	-0.111448	-0.508429	0.285533	0.202541	0.582151	0.99562
	Hematemesis	IVW	2	-0.217411	-0.994424	0.559603	0.396435	0.583408	0.99562
	Osteomyelitis	IVW	2	0.354228	-0.911866	1.62032	0.645966	0.583438	0.99562
	Calculus of bile duct	IVW	2	-0.123706	-0.568965	0.321553	0.227173	0.586068	0.99562
	Renal failure	IVW	2	-0.0751669	-0.345748	0.195414	0.138052	0.586108	0.99562
	Peritoneal adhesions (postoperative) (postinfection)	IVW	2	-0.110203	-0.50844	0.288035	0.203182	0.587555	0.99562
	Fracture of pelvis	IVW	2	0.229867	-0.612377	1.07211	0.429717	0.5927	0.99562
	Polyarteritis nodosa and allied conditions	IVW	2	0.212119	-0.567864	0.992101	0.39795	0.594014	0.99562
	Retention of urine	IVW	2	0.094814	-0.254676	0.444304	0.178311	0.594911	0.99562
	Secondary malignancy of respiratory organs	IVW	2	0.129221	-0.348419	0.606862	0.243694	0.595931	0.99562
	Fasciitis	IVW	2	0.234404	-0.646729	1.11554	0.449558	0.602082	0.99562
	Aphasia/speech disturbance	IVW	2	0.225267	-0.625854	1.07639	0.434246	0.603932	0.99562
	Right bundle branch block	IVW	1	0.439137	-1.22188	2.10015	0.847458	0.604331	0.926963
	Hypertensive heart and/or renal disease	IVW	2	0.14538	-0.406926	0.697686	0.281789	0.605911	0.99562
	Gastrointestinal hemorrhage	IVW	2	0.0416401	-0.117152	0.200432	0.0810165	0.607273	0.99562
	Ectropion or entropion	IVW	2	-0.181679	-0.879038	0.515681	0.355796	0.609612	0.99562
	Pain in limb	IVW	2	0.0746188	-0.211842	0.36108	0.146154	0.609666	0.99562
	Hypertension complicating pregnancy, childbirth, and the puerperium	IVW	2	0.188047	-0.534481	0.910576	0.368637	0.609971	0.99562
	Diseases of pulp and periapical tissues	IVW	2	0.140043	-0.398516	0.678602	0.274775	0.610287	0.99562
	Cancer of brain and nervous system	IVW	2	0.256074	-0.730968	1.24312	0.503593	0.611107	0.99562
	Congestive heart failure (CHF) NOS	IVW	2	-0.131669	-0.639804	0.376467	0.259253	0.611539	0.99562
	Skin cancer	IVW	2	-0.0531781	-0.258935	0.152579	0.104978	0.612461	0.99562
	Complication of internal orthopedic device	IVW	2	-0.108066	-0.526288	0.310157	0.213379	0.612541	0.99562
	Postinflammatory pulmonary fibrosis	IVW	2	-0.196186	-0.95569	0.563317	0.387502	0.612657	0.99562
	Diseases of the larynx and vocal cords	IVW	2	0.114685	-0.330574	0.559944	0.227173	0.613675	0.99562
	Diaphragmatic hernia	IVW	2	0.0696323	-0.200895	0.340159	0.138024	0.613914	0.99562
	Dental caries	IVW	2	-0.109183	-0.53403	0.315664	0.216759	0.614467	0.99562
	Postmenopausal atrophic vaginitis	IVW	2	-0.175237	-0.858688	0.508214	0.348699	0.615285	0.99562
	Cholecystitis without cholelithiasis	IVW	2	-0.262857	-1.28808	0.762367	0.523074	0.615299	0.99562
	Swelling of limb	IVW	2	-0.088703	-0.436337	0.258931	0.177364	0.616993	0.99562
	Osteoarthrosis NOS	IVW	2	0.11492	-0.336472	0.566311	0.230302	0.617782	0.99562
	Pneumonia	IVW	2	0.127249	-0.372829	0.627327	0.255142	0.617964	0.99562
	Osteomyelitis, periostitis, and other infections involving bone	IVW	2	0.389394	-1.14244	1.92123	0.78155	0.61832	0.99562
	Other conditions of brain	IVW	2	-0.15405	-0.761108	0.453009	0.309724	0.618923	0.99562
	Duodenal ulcer	IVW	2	0.165686	-0.48726	0.818633	0.333136	0.61894	0.99562
	Gangrene	IVW	2	-0.253423	-1.25437	0.747521	0.510686	0.619725	0.99562
	Spondylosis without myelopathy	IVW	2	0.0805104	-0.237711	0.398732	0.162358	0.619977	0.99562
	Synovitis and tenosynovitis	IVW	2	-0.107945	-0.537944	0.322054	0.219387	0.6227	0.99562
	Menopausal and postmenopausal disorders	IVW	2	-0.0557824	-0.278722	0.167157	0.113745	0.623839	0.99562
	Femoral hernia	IVW	2	-0.220448	-1.11097	0.67007	0.454346	0.627535	0.99562
	Diabetic retinopathy	IVW	2	0.232041	-0.705379	1.16946	0.478276	0.627562	0.99562
	Intracranial hemorrhage	IVW	2	0.133183	-0.405376	0.671742	0.274775	0.627891	0.99562
	Other disorders of stomach and duodenum	IVW	2	-0.100191	-0.507084	0.306702	0.207599	0.629366	0.99562
	Benign neoplasm of other parts of digestive system	IVW	2	-0.102084	-0.518892	0.314723	0.212657	0.631197	0.99562
	Disorders of mineral metabolism	IVW	2	-0.122277	-0.625041	0.380487	0.256512	0.633583	0.99562
	Cervical intraepithelial neoplasia [CIN] [Cervical dysplasia]	IVW	2	0.118546	-0.374975	0.612067	0.251797	0.637783	0.99562
	Hyperlipidemia	IVW	2	0.0318697	-0.101385	0.165124	0.0679868	0.63924	0.99562
	Phlebitis and thrombophlebitis	IVW	2	-0.0871952	-0.453056	0.278665	0.186664	0.64041	0.99562
	Alcoholic liver damage	IVW	1	-0.539291	-2.80431	1.72573	1.15562	0.640738	0.926963
	Hemorrhage during pregnancy; childbirth and postpartum	IVW	2	0.130032	-0.417611	0.677676	0.27941	0.641658	0.99562
	Diseases of hard tissues of teeth	IVW	2	-0.105397	-0.550073	0.33928	0.226876	0.642249	0.99562
	Diverticulosis and diverticulitis	IVW	2	0.035345	-0.114421	0.185111	0.0764114	0.643678	0.99562
	Actinic keratosis	IVW	2	0.10488	-0.340379	0.550139	0.227173	0.644313	0.99562
	Abdominal pain	IVW	2	0.0477881	-0.155889	0.251465	0.103917	0.64561	0.99562
	Ventral hernia	IVW	2	0.0896246	-0.292732	0.471981	0.19508	0.645929	0.99562
	Altered mental status	IVW	2	0.139244	-0.458276	0.736764	0.304857	0.64785	0.99562
	Diverticulosis	IVW	2	0.0358487	-0.119939	0.191636	0.0794834	0.651974	0.99562
	Other disorders of eyelids	IVW	2	-0.0691958	-0.371537	0.233145	0.154256	0.653736	0.99562
	Postmenopausal bleeding	IVW	2	-0.0720302	-0.38777	0.243709	0.161092	0.654775	0.99562
	Fracture of clavicle or scapula	IVW	2	-0.141257	-0.760876	0.478362	0.316132	0.654999	0.99562
	Traumatic arthropathy	IVW	2	0.224904	-0.762139	1.21195	0.503593	0.655165	0.99562
	Disorders of vitreous body	IVW	2	0.137925	-0.469133	0.744983	0.309724	0.656091	0.99562
	Late effects of cerebrovascular disease	IVW	2	0.144121	-0.491049	0.77929	0.324066	0.656517	0.99562
	Malignant neoplasm of testis	IVW	2	-0.0825608	-0.447783	0.282662	0.186338	0.657715	0.99562
	Stricture and stenosis of esophagus	IVW	2	-0.22802	-1.2374	0.781363	0.514991	0.657936	0.99562
	Simple and unspecified goiter	IVW	2	-0.570123	-3.1051	1.96485	1.29335	0.659351	0.99562
	Varicose veins	IVW	2	-0.0464794	-0.254127	0.161169	0.105943	0.660864	0.99562
	Respiratory insufficiency	IVW	2	0.309857	-1.07494	1.69465	0.706528	0.660978	0.99562
	Megaloblastic anemia	IVW	2	-0.152899	-0.83635	0.530552	0.348699	0.661035	0.99562
	Neoplasm of unspecified nature of digestive system	IVW	2	0.155913	-0.541446	0.853272	0.355796	0.661234	0.99562
	Genital prolapse	IVW	2	-0.0494043	-0.271042	0.172234	0.113081	0.662188	0.99562
	Malignant neoplasm of ovary	IVW	2	0.109592	-0.383929	0.603113	0.251797	0.663387	0.99562
	Burns	IVW	2	0.52734	-1.871	2.92568	1.22364	0.666498	0.99562
	Sicca syndrome	IVW	2	0.21996	-0.781078	1.221	0.510734	0.666705	0.99562
	Other deficiency anemia	IVW	2	-0.14705	-0.816475	0.522374	0.341543	0.666798	0.99562
	Cardiac conduction disorders	IVW	2	0.0938787	-0.336764	0.524521	0.219715	0.66918	0.99562
	Musculoskeletal symptoms referable to limbs	IVW	2	-0.0660133	-0.368962	0.236935	0.154566	0.669314	0.99562
	Breast cancer	IVW	2	-0.0652274	-0.365359	0.234904	0.153128	0.670133	0.99562
	Problems associated with amniotic cavity and membranes	IVW	2	-0.134485	-0.755662	0.486693	0.316927	0.671318	0.99562
	Chronic cystitis	IVW	2	0.164365	-0.595139	0.923869	0.387502	0.671445	0.99562
	Cardiac dysrhythmias	IVW	2	-0.0329197	-0.185489	0.11965	0.0778416	0.672364	0.99562
	Aseptic necrosis of bone	IVW	2	0.208205	-0.758435	1.17484	0.493183	0.672905	0.99562
	Secondary malignant neoplasm	IVW	2	0.0512784	-0.18691	0.289467	0.121525	0.673056	0.99562
	Glomerulonephritis	IVW	2	-0.191639	-1.08184	0.698566	0.454186	0.67307	0.99562
	Abnormal findings on examination of urine	IVW	2	-0.081636	-0.463376	0.300104	0.194765	0.675106	0.99562
	Heart valve disorders	IVW	2	-0.133559	-0.760796	0.493677	0.320019	0.676423	0.99562
	Sepsis and SIRS	IVW	2	-0.144161	-0.821281	0.532959	0.345469	0.676466	0.99562
	Sepsis	IVW	2	-0.144161	-0.821281	0.532959	0.345469	0.676466	0.99562
	Other specified nonpsychotic and/or transient mental disorders	IVW	2	0.189083	-0.701435	1.0796	0.454346	0.677289	0.99562
	Cancer of urinary organs (incl. kidney and bladder)	IVW	2	0.0741506	-0.27583	0.424131	0.178562	0.677947	0.99562
	Pelvic peritoneal adhesions, female (postoperative) (postinfection)	IVW	2	0.0943027	-0.352179	0.540784	0.227797	0.678891	0.99562
	Benign neoplasm of ovary	IVW	2	0.297691	-1.12032	1.7157	0.723474	0.680724	0.99562
	Renal failure NOS	IVW	2	0.126992	-0.480066	0.73405	0.309724	0.681793	0.99562
	Other symptoms of respiratory system	IVW	2	0.0502101	-0.190389	0.290809	0.122754	0.682519	0.99562
	Viral warts & HPV	IVW	2	0.149768	-0.567897	0.867434	0.366156	0.682519	0.99562
	Respiratory failure	IVW	2	0.193739	-0.739619	1.1271	0.476203	0.684124	0.99562
	Abnormal movement	IVW	2	0.127551	-0.487735	0.742838	0.313922	0.684511	0.99562
	Chronic airway obstruction	IVW	2	0.0780902	-0.300279	0.456459	0.193045	0.685832	0.99562
	Sleep apnea	IVW	2	0.0807259	-0.311942	0.473394	0.200341	0.68699	0.99562
	Jaundice (not of newborn)	IVW	2	-0.155792	-0.915296	0.603711	0.387502	0.687652	0.99562
	Cancer of other female genital organs	IVW	2	0.0938106	-0.367328	0.554949	0.235275	0.690094	0.99562
	Peritoneal or intestinal adhesions	IVW	2	-0.158223	-0.938205	0.62176	0.39795	0.690929	0.99562
	Chemotherapy	IVW	2	0.0403012	-0.16037	0.240972	0.102383	0.693853	0.99562
	Disorders of lipoid metabolism	IVW	2	0.0265688	-0.106685	0.159823	0.0679868	0.69595	0.99562
	Other symptoms/disorders or the urinary system	IVW	2	-0.0296115	-0.179378	0.120155	0.0764114	0.698366	0.99562
	Anaphylactic shock NOS	IVW	2	0.330681	-1.35241	2.01377	0.858721	0.700174	0.99562
	Asthma	IVW	2	0.0798229	-0.328848	0.488494	0.208505	0.701843	0.99562
	Bacterial infection NOS	IVW	2	0.0399754	-0.166455	0.246406	0.105321	0.704275	0.99562
	Other disorders of intestine	IVW	2	-0.0811905	-0.501309	0.338928	0.214346	0.70485	0.99562
	Poisoning by other anti-infectives	IVW	2	-0.121818	-0.756988	0.513351	0.324066	0.706987	0.99562
	Retinal vascular changes and abnomalities	IVW	2	0.149087	-0.630896	0.929069	0.39795	0.70793	0.99562
	Postoperative infection	IVW	2	0.063873	-0.270839	0.398585	0.170772	0.708385	0.99562
	First degree AV block	IVW	2	0.136718	-0.580947	0.854384	0.366156	0.70886	0.99562
	Symptoms and disorders of the joints	IVW	2	-0.0718653	-0.452967	0.309236	0.19444	0.711679	0.99562
	Disorders of esophageal motility	IVW	2	-0.386664	-2.45213	1.6788	1.05381	0.713678	0.99562
	Decreased white blood cell count	IVW	2	0.0904894	-0.393317	0.574296	0.24684	0.713924	0.99562
	Neutropenia	IVW	2	0.0904894	-0.393317	0.574296	0.24684	0.713924	0.99562
	Lymphadenitis	IVW	2	-0.087162	-0.554478	0.380154	0.238427	0.714685	0.99562
	Malposition and malpresentation of fetus or obstruction	IVW	2	0.105833	-0.46709	0.678755	0.292307	0.717307	0.99562
	Other arthropathies	IVW	2	-0.0466088	-0.300652	0.207435	0.129614	0.719149	0.99562
	Intracerebral hemorrhage	IVW	2	-0.156218	-1.01237	0.699939	0.436815	0.72062	0.99562
	Abnormal sputum	IVW	2	0.137491	-0.61644	0.891422	0.384659	0.720765	0.99562
	Lipoma	IVW	2	-0.0517107	-0.337537	0.234116	0.14583	0.722892	0.99562
	Other disorders of synovium, tendon, and bursa	IVW	2	-0.079749	-0.521606	0.362108	0.225437	0.723524	0.99562
	Breast cancer [female]	IVW	2	-0.0508649	-0.335213	0.233483	0.145076	0.725881	0.99562
	Multiple myeloma	IVW	2	-0.169744	-1.1225	0.783011	0.486099	0.726942	0.99562
	Rupture of synovium	IVW	2	0.161941	-0.762786	1.08667	0.4718	0.731417	0.99562
	Emphysema	IVW	2	-0.151501	-1.01814	0.715137	0.442162	0.731872	0.99562
	Hallux rigidus	IVW	2	0.0999438	-0.472978	0.672866	0.292307	0.732416	0.99562
	Diplopia and disorders of binocular vision	IVW	2	-0.216588	-1.46278	1.02961	0.635813	0.733369	0.99562
	Paroxysmal tachycardia, unspecified	IVW	2	0.0690217	-0.328598	0.466642	0.202867	0.733683	0.99562
	Pain	IVW	2	0.139463	-0.668376	0.947302	0.412163	0.735085	0.99562
	Rheumatic disease of the heart valves	IVW	2	-0.157852	-1.0739	0.758192	0.467369	0.735555	0.99562
	Cervical cancer and dysplasia	IVW	2	0.0651479	-0.315954	0.44625	0.19444	0.737584	0.99562
	Myeloproliferative disease	IVW	2	-0.122522	-0.840188	0.595143	0.366156	0.737914	0.99562
	Viral infection	IVW	2	0.117525	-0.578896	0.813947	0.355317	0.740825	0.99562
	Syncope and collapse	IVW	2	0.0655814	-0.324269	0.455431	0.198903	0.741615	0.99562
	Abnormal findings on exam of gastrointestinal tract/ abdominal area	IVW	2	-0.0918659	-0.650698	0.466966	0.285118	0.747299	0.99562
	Functional disorders of bladder	IVW	2	0.0946728	-0.486407	0.675752	0.296469	0.749473	0.99562
	Fracture of unspecified bones	IVW	2	0.101195	-0.519982	0.722373	0.316927	0.749498	0.99562
	Other chronic ischemic heart disease, unspecified	IVW	2	-0.031224	-0.222986	0.160538	0.0978378	0.74962	0.99562
	Other acquired musculoskeletal deformity	IVW	2	-0.15283	-1.09311	0.787446	0.479733	0.75005	0.99562
	Cellulitis and abscess of trunk	IVW	2	-0.150088	-1.07482	0.77464	0.4718	0.750395	0.99562
	Vascular insufficiency of intestine	IVW	2	-0.323001	-2.33439	1.68839	1.02622	0.752953	0.99562
	Fracture of vertebral column without mention of spinal cord injury	IVW	2	0.0993846	-0.521793	0.720562	0.316927	0.753834	0.99562
	Cervicitis and endocervicitis	IVW	2	-0.098212	-0.719389	0.522965	0.316927	0.756646	0.99562
	Other disorders of circulatory system	IVW	2	-0.0277925	-0.203668	0.148083	0.0897323	0.756769	0.99562
	Ulcerative colitis (chronic)	IVW	2	-0.231379	-1.70129	1.23853	0.749955	0.757684	0.99562
	Renal colic	IVW	2	0.0793932	-0.428742	0.587529	0.259253	0.759423	0.99562
	Carbuncle and furuncle	IVW	2	-0.166165	-1.23112	0.898789	0.543344	0.759742	0.99562
	Dysmenorrhea	IVW	2	0.0835618	-0.454997	0.622121	0.274775	0.761044	0.99562
	Secondary malignancy of lymph nodes	IVW	2	0.0490874	-0.267832	0.366007	0.161694	0.761446	0.99562
	Schizophrenia	IVW	2	-0.146975	-1.09973	0.805779	0.486099	0.76238	0.99562
	Ptosis of eyelid	IVW	2	-0.0804334	-0.60509	0.444223	0.267682	0.76381	0.99562
	Chronic fatigue syndrome	IVW	2	-0.140301	-1.06503	0.784426	0.4718	0.766181	0.99562
	Disorders of external ear	IVW	2	0.0950131	-0.53422	0.724246	0.321037	0.767263	0.99562
	Prolapse of vaginal walls	IVW	2	-0.0406411	-0.310588	0.229306	0.137728	0.767931	0.99562
	Abdominal aortic aneurysm	IVW	2	0.114155	-0.645348	0.873659	0.387502	0.768305	0.99562
	Vaginal enterocele, congenital or acquired	IVW	2	-0.166206	-1.28873	0.956318	0.572717	0.771658	0.99562
	Iron deficiency anemias	IVW	2	0.0377366	-0.217564	0.293037	0.130255	0.772036	0.99562
	Malignant neoplasm of uterus	IVW	2	-0.0928645	-0.728034	0.542305	0.324066	0.774449	0.99562
	Circulatory disease NEC	IVW	2	-0.0272436	-0.21712	0.162632	0.0968755	0.778539	0.99562
	Fracture of ankle and foot	IVW	2	0.125451	-0.757812	1.00871	0.450645	0.78072	0.99562
	Curvature of spine	IVW	2	0.0945843	-0.57484	0.764009	0.341543	0.781832	0.99562
	Gingival and periodontal diseases	IVW	2	-0.0949353	-0.773311	0.58344	0.34611	0.78386	0.99562
	Hemiplegia	IVW	2	0.0819447	-0.504929	0.668818	0.299425	0.784336	0.99562
	Obstruction of bile duct	IVW	2	-0.32789	-2.692	2.03622	1.20618	0.785743	0.99562
	Hypertrophy of female genital organs	IVW	2	0.0879288	-0.547241	0.723098	0.324066	0.786137	0.99562
	Arthropathy NOS	IVW	2	-0.035661	-0.299104	0.227782	0.13441	0.790766	0.99562
	Abdominal hernia	IVW	2	-0.0149545	-0.126109	0.0962001	0.0567116	0.792015	0.99562
	Intervertebral disc disorders	IVW	2	0.0317876	-0.207033	0.270608	0.121847	0.794184	0.99562
	Other ill-defined and unknown causes of morbidity and mortality	IVW	2	0.0251465	-0.164729	0.215022	0.0968755	0.795191	0.99562
	Fracture of foot	IVW	2	-0.0741641	-0.635769	0.487441	0.286533	0.795765	0.99562
	Diseases of lips	IVW	2	0.110679	-0.745478	0.966835	0.436815	0.799977	0.99562
	Gastric ulcer	IVW	2	0.0447758	-0.305818	0.39537	0.178874	0.80234	0.99562
	Abnormal involuntary movements	IVW	1	-0.103806	-0.917647	0.710035	0.415225	0.802587	0.926963
	Precordial pain	IVW	2	-0.0467853	-0.428526	0.334955	0.194765	0.810165	0.99562
	Disorders of the pituitary gland and its hypothalamic control	IVW	2	-0.10449	-0.960647	0.751666	0.436815	0.810943	0.99562
	Acute pharyngitis	IVW	2	-0.0930648	-0.858966	0.672837	0.390766	0.811757	0.99562
	Fracture of tibia and fibula	IVW	2	0.0592993	-0.433598	0.552197	0.251478	0.813586	0.99562
	Paroxysmal supraventricular tachycardia	IVW	2	0.0672421	-0.492252	0.626736	0.285456	0.813774	0.99562
	Paroxysmal ventricular tachycardia	IVW	2	0.14914	-1.09946	1.39774	0.637039	0.814896	0.99562
	Intestinal infection	IVW	2	-0.0284268	-0.267247	0.210394	0.121847	0.81553	0.99562
	Myocardial infarction	IVW	2	-0.0263761	-0.248685	0.195933	0.113423	0.816114	0.99562
	Vitamin deficiency	IVW	2	-0.100081	-0.951702	0.75154	0.4345	0.817831	0.99562
	Lymphoid leukemia, chronic	IVW	2	0.121661	-0.922846	1.16617	0.532912	0.819417	0.99562
	Obstructive chronic bronchitis	IVW	2	0.141778	-1.07804	1.3616	0.622357	0.819796	0.99562
	Hypopotassemia	IVW	1	-0.192604	-1.85362	1.46841	0.847458	0.820212	0.926963
	Kyphoscoliosis and scoliosis	IVW	2	0.077767	-0.619592	0.775126	0.355796	0.826983	0.99562
	Pancreatic cancer	IVW	2	-0.102868	-1.0276	0.821859	0.4718	0.827403	0.99562
	Chronic ulcer of skin	IVW	2	-0.0695872	-0.69674	0.557565	0.319976	0.827837	0.99562
	Complication of colostomy or enterostomy	IVW	2	0.116107	-0.940862	1.17308	0.53927	0.82953	0.99562
	Bronchiectasis	IVW	2	-0.0574833	-0.58214	0.467173	0.267682	0.829966	0.99562
	Other diseases of the teeth and supporting structures	IVW	2	-0.0469819	-0.476981	0.383017	0.219387	0.83043	0.99562
	Atrioventricular block, complete	IVW	2	-0.10233	-1.04111	0.836453	0.478971	0.830823	0.99562
	Purpura and other hemorrhagic conditions	IVW	2	-0.0584456	-0.597005	0.480113	0.274775	0.831558	0.99562
	Myopia	IVW	2	-0.113449	-1.16056	0.93366	0.534239	0.831829	0.99562
	Other disorders of metabolism	IVW	2	-0.0656227	-0.672681	0.541436	0.309724	0.832205	0.99562
	Endometrial hyperplasia	IVW	2	0.0721978	-0.597227	0.741622	0.341543	0.832585	0.99562
	Other specified benign mammary dysplasias	IVW	2	-0.123998	-1.27603	1.02803	0.587771	0.832916	0.99562
	Hemorrhage of gastrointestinal tract	IVW	2	0.0339783	-0.283606	0.351563	0.162033	0.833902	0.99562
	Malaise and fatigue	IVW	2	0.0423782	-0.353941	0.438697	0.202204	0.833994	0.99562
	Streptococcus infection	IVW	2	0.0594364	-0.499395	0.618268	0.285118	0.834868	0.99562
	Disorders of conjunctiva	IVW	2	-0.0856493	-0.899782	0.728484	0.415374	0.836636	0.99562
	Flatulence	IVW	2	-0.126381	-1.35124	1.09847	0.624926	0.839735	0.99562
	Varicose veins of lower extremity, symptomtic	IVW	2	-0.0929135	-0.997375	0.811548	0.46146	0.840427	0.99562
	Abnormal function study of cardiovascular system	IVW	2	-0.101184	-1.08823	0.885858	0.503593	0.840758	0.99562
	Multiple sclerosis	IVW	2	-0.0635065	-0.684684	0.557671	0.316927	0.841182	0.99562
	Infection of the eye	IVW	2	0.096804	-0.85595	1.04956	0.486099	0.84215	0.99562
	Bacterial pneumonia	IVW	2	0.0570748	-0.504748	0.618898	0.286644	0.842174	0.99562
	Other specified osteoporosis	IVW	2	0.18187	-1.62396	1.9877	0.921343	0.843517	0.99562
	Voice disturbance	IVW	2	-0.0678761	-0.751327	0.615575	0.348699	0.845663	0.99562
	Other nonmalignant breast conditions	IVW	2	-0.0541927	-0.602421	0.494036	0.279708	0.846374	0.99562
	Other derangement of joint	IVW	2	0.0501063	-0.458671	0.558883	0.25958	0.846937	0.99562
	Macular degeneration (senile) of retina NOS	IVW	2	0.0467061	-0.43154	0.524952	0.244003	0.848199	0.99562
	Inflammatory disease of breast	IVW	2	-0.105045	-1.19257	0.982476	0.554858	0.849843	0.99562
	Degenerative skin conditions and other dermatoses	IVW	2	0.0287139	-0.274235	0.331662	0.154566	0.852624	0.99562
	Genitourinary congenital anomalies	IVW	2	0.0538833	-0.519039	0.626806	0.292307	0.853748	0.99562
	Hypotension	IVW	2	0.0627983	-0.604954	0.73055	0.34069	0.853757	0.99562
	Dizziness and giddiness (Light-headedness and vertigo)	IVW	2	0.0314106	-0.30269	0.365512	0.17046	0.853802	0.99562
	Esophagitis, GERD and related diseases	IVW	2	0.037189	-0.360024	0.434402	0.202659	0.854402	0.99562
	Uterine/Uterovaginal prolapse	IVW	2	-0.0296646	-0.347249	0.28792	0.162033	0.854737	0.99562
	GERD	IVW	2	-0.0176861	-0.208864	0.173492	0.0975399	0.856115	0.99562
	Derangement of joint, non-traumatic	IVW	2	-0.0429838	-0.509048	0.42308	0.237788	0.856552	0.99562
	Hemoptysis	IVW	2	0.0598554	-0.591725	0.711436	0.332439	0.857114	0.99562
	Mood disorders	IVW	2	0.0398767	-0.396413	0.476167	0.222597	0.857825	0.99562
	Dysphagia	IVW	2	-0.029858	-0.358358	0.298642	0.167602	0.858607	0.99562
	Hypercholesterolemia	IVW	2	0.0122054	-0.124485	0.148896	0.0697399	0.86107	0.99562
	Corneal opacity and other disorders of cornea	IVW	2	0.143257	-1.4625	1.74901	0.819262	0.861188	0.99562
	Ganglion and cyst of synovium, tendon, and bursa	IVW	2	0.0475627	-0.487366	0.582492	0.272923	0.861652	0.99562
	Calculus of kidney	IVW	2	0.0351885	-0.363049	0.433426	0.203182	0.862505	0.99562
	Depression	IVW	2	0.0365398	-0.381404	0.454484	0.213237	0.863942	0.99562
	Hemangioma and lymphangioma, any site	IVW	2	0.0681321	-0.715133	0.851397	0.399625	0.864625	0.99562
	Intestinal malabsorption (non-celiac)	IVW	2	-0.0767676	-0.961801	0.808266	0.451548	0.865002	0.99562
	Poisoning/allergy of sulfonamides	IVW	2	-0.0661242	-0.832026	0.699777	0.390766	0.865626	0.99562
	Osteopenia or other disorder of bone and cartilage	IVW	2	0.077463	-0.826495	0.981421	0.461203	0.866616	0.99562
	Allergy/adverse effect of penicillin	IVW	2	0.0161078	-0.173768	0.205984	0.0968755	0.867942	0.99562
	Calculus of ureter	IVW	2	-0.0572044	-0.73439	0.619981	0.345503	0.868497	0.99562
	Anxiety disorders	IVW	2	-0.0475316	-0.612203	0.51714	0.288098	0.868956	0.99562
	Noninflammatory disorders of vulva and perineum	IVW	2	0.0517915	-0.569386	0.672969	0.316927	0.87019	0.99562
	Peripheral vascular disease, unspecified	IVW	2	-0.0562626	-0.73358	0.621055	0.34557	0.870667	0.99562
	Injury, NOS	IVW	2	-0.0661181	-0.865366	0.733129	0.407779	0.871194	0.99562
	Chronic bronchitis	IVW	2	0.0875857	-0.993967	1.16914	0.551813	0.873887	0.99562
	Other unspecified back disorders	IVW	2	0.0451587	-0.513673	0.603991	0.285118	0.874153	0.99562
	Arrhythmia (cardiac) NOS	IVW	2	-0.0961199	-1.30554	1.1133	0.617053	0.876212	0.99562
	Cerebral artery occlusion, with cerebral infarction	IVW	2	-0.100855	-1.37315	1.17144	0.649132	0.87653	0.99562
	Diseases of spleen	IVW	2	-0.0792212	-1.08026	0.921817	0.510734	0.876733	0.99562
	Pneumonitis due to inhalation of food or vomitus	IVW	2	0.0730651	-0.865718	1.01185	0.478971	0.878756	0.99562
	Fracture of upper limb	IVW	2	-0.0498594	-0.691484	0.591765	0.327359	0.878944	0.99562
	Nasal polyps	IVW	2	-0.0505076	-0.700576	0.599561	0.331667	0.878963	0.99562
	Other dyspnea	IVW	2	0.110799	-1.33715	1.55875	0.738751	0.880779	0.99562
	Tinnitus	IVW	2	-0.0812162	-1.14634	0.983904	0.543428	0.881197	0.99562
	Cerebrovascular disease	IVW	2	0.0182276	-0.221189	0.257645	0.122151	0.881379	0.99562
	Diseases of the oral soft tissues, excluding lesions specific for gingiva and tongue	IVW	2	0.0366358	-0.445139	0.518411	0.245804	0.881518	0.99562
	Other and unspecified disorders of back	IVW	2	0.0374518	-0.456069	0.530973	0.251797	0.88176	0.99562
	Symptoms concerning nutrition, metabolism, and development	IVW	2	-0.0227195	-0.325668	0.280229	0.154566	0.88314	0.99562
	Atrioventricular [AV] block	IVW	2	0.0533321	-0.663992	0.770656	0.365982	0.88414	0.99562
	Spondylosis and allied disorders	IVW	2	0.0188485	-0.235852	0.273549	0.129949	0.884675	0.99562
	Endocarditis	IVW	2	-0.0633313	-0.919488	0.792825	0.436815	0.884723	0.99562
	Phobia	IVW	2	0.0733531	-0.927685	1.07439	0.510734	0.885798	0.99562
	Acute pancreatitis	IVW	2	-0.0372521	-0.546654	0.472149	0.259899	0.886027	0.99562
	Diseases of pancreas	IVW	2	0.0324972	-0.412121	0.477116	0.226846	0.886088	0.99562
	Portal hypertension	IVW	2	-0.0755984	-1.12785	0.976649	0.536861	0.888016	0.99562
	Other cerebral degenerations	IVW	2	0.0488008	-0.63465	0.732252	0.348699	0.888699	0.99562
	Pleurisy; pleural effusion	IVW	2	-0.0203744	-0.306201	0.265452	0.14583	0.888886	0.99562
	Appendiceal conditions	IVW	2	-0.0282839	-0.425265	0.368697	0.202541	0.88894	0.99562
	Myalgia and myositis unspecified	IVW	2	-0.0629777	-0.953496	0.82754	0.454346	0.889757	0.99562
	Nonrheumatic mitral valve disorders	IVW	2	-0.0604092	-0.920361	0.799543	0.438751	0.89049	0.99562
	Sciatica	IVW	2	-0.0354356	-0.540393	0.469522	0.257631	0.890601	0.99562
	Benign neoplasm of lip, oral cavity, and pharynx	IVW	2	-0.0578702	-0.888906	0.773165	0.423998	0.891436	0.99562
	Rash and other nonspecific skin eruption	IVW	2	0.0340293	-0.458227	0.526286	0.251151	0.892222	0.99562
	Ulcer of esophagus	IVW	2	-0.0541294	-0.848925	0.740666	0.405508	0.89381	0.99562
	Other venous embolism and thrombosis	IVW	2	-0.124576	-1.95476	1.70561	0.933766	0.893868	0.99562
	Nonspecific chest pain	IVW	2	-0.00929499	-0.145985	0.127395	0.0697399	0.893971	0.99562
	Phlebitis and thrombophlebitis of lower extremities	IVW	2	-0.0259296	-0.40767	0.355811	0.194765	0.894089	0.99562
	Diseases and other conditions of the tongue	IVW	2	0.0435327	-0.605501	0.692566	0.331139	0.895409	0.99562
	Non-Hodgkins lymphoma	IVW	2	0.0727531	-1.01933	1.16484	0.557186	0.896114	0.99562
	Hypertensive chronic kidney disease	IVW	2	0.0379187	-0.535004	0.610841	0.292307	0.896786	0.99562
	Degeneration of macula and posterior pole of retina	IVW	1	0.0924499	-1.31186	1.49676	0.716487	0.897332	0.926963
	Open-angle glaucoma	IVW	2	0.0582467	-0.845933	0.962426	0.461316	0.899525	0.99562
	Thrombocytopenia	IVW	2	-0.0362601	-0.609182	0.536662	0.292307	0.901277	0.99562
	Other signs and symptoms in breast	IVW	2	-0.0542527	-0.916614	0.808109	0.43998	0.901864	0.99562
	Neoplasm of uncertain behavior	IVW	2	0.0421497	-0.631515	0.715815	0.343707	0.902398	0.99562
	Tobacco use disorder	IVW	2	-0.0188669	-0.32152	0.283786	0.154415	0.902754	0.99562
	Degeneration of intervertebral disc	IVW	2	-0.0896102	-1.56827	1.38904	0.754416	0.905449	0.99562
	Chronic renal failure [CKD]	IVW	2	0.0266382	-0.41798	0.471257	0.226846	0.906521	0.99562
	Other inflammatory spondylopathies	IVW	2	-0.0330461	-0.591878	0.525786	0.285118	0.907729	0.99562
	Epiphora	IVW	2	0.0609288	-0.975543	1.0974	0.528812	0.908272	0.99562
	Neuralgia, neuritis, and radiculitis NOS	IVW	2	-0.038942	-0.701709	0.623825	0.338147	0.908316	0.99562
	Primary open angle glaucoma	IVW	2	0.0549671	-0.888934	0.998868	0.481582	0.909128	0.99562
	Septicemia	IVW	2	-0.0207369	-0.390008	0.348534	0.188404	0.912357	0.99562
	Chronic periodontitis	IVW	2	0.0527011	-0.900053	1.00546	0.486099	0.913665	0.99562
	Aneurysm and dissection of heart	IVW	2	0.0469752	-0.809181	0.903132	0.436815	0.91436	0.99562
	Otitis externa	IVW	2	0.0724589	-1.2521	1.39701	0.675793	0.914614	0.99562
	Cellulitis and abscess of face/neck	IVW	2	-0.0528232	-1.03987	0.934219	0.503593	0.916461	0.99562
	Hypotension NOS	IVW	2	0.0397596	-0.713661	0.79318	0.384398	0.917619	0.99562
	Malignant neoplasm of female breast	IVW	2	-0.0150749	-0.303066	0.272916	0.146934	0.918283	0.99562
	Other mental disorder	IVW	2	-0.00894038	-0.185172	0.167291	0.0899141	0.920795	0.99562
	Diseases of esophagus	IVW	2	0.0201006	-0.384265	0.424466	0.206309	0.922385	0.99562
	Vertiginous syndromes and other disorders of vestibular system	IVW	2	-0.0136842	-0.30075	0.273382	0.146462	0.925561	0.99562
	Appendicitis	IVW	2	-0.0189339	-0.417171	0.379304	0.203182	0.925755	0.99562
	Other disorders of tympanic membrane	IVW	1	-0.0847458	-1.89676	1.72727	0.924499	0.926963	0.926963
	Cellulitis and abscess of leg, except foot	IVW	2	-0.0139522	-0.316293	0.288389	0.154256	0.927931	0.99562
	Other benign neoplasm of connective and other soft tissue	IVW	2	0.0499412	-1.03534	1.13523	0.553717	0.928134	0.99562
	Fracture of humerus	IVW	2	0.0247505	-0.527556	0.577057	0.281789	0.930009	0.99562
	Disorders of refraction and accommodation; blindness and low vision	IVW	2	0.0305692	-0.670057	0.731195	0.357462	0.93185	0.99562
	Pruritus and related conditions	IVW	2	-0.0345494	-0.842388	0.773289	0.412163	0.933196	0.99562
	Peripheral vascular disease	IVW	2	0.0152705	-0.35059	0.381131	0.186664	0.9348	0.99562
	Disorders of lacrimal system	IVW	2	-0.0373532	-0.948769	0.874063	0.465008	0.935976	0.99562
	Abnormality of gait	IVW	2	0.0470109	-1.11881	1.21283	0.594807	0.937004	0.99562
	Other local infections of skin and subcutaneous tissue	IVW	2	-0.0298937	-0.787178	0.72739	0.386369	0.938329	0.99562
	Fracture of radius and ulna	IVW	2	-0.0344295	-0.95462	0.885761	0.469485	0.94154	0.99562
	Cellulitis and abscess of arm/hand	IVW	2	0.0112113	-0.29113	0.313553	0.154256	0.942061	0.99562
	Heartburn	IVW	2	0.0381778	-0.99601	1.07237	0.527647	0.94232	0.99562
	Atopic/contact dermatitis due to other or unspecified	IVW	2	0.0254519	-0.664006	0.71491	0.351764	0.94232	0.99562
	Seborrheic keratosis	IVW	2	0.0153065	-0.402843	0.433456	0.213341	0.942804	0.99562
	Other disorders of pancreatic internal secretion	IVW	2	0.0415453	-1.09831	1.1814	0.581558	0.943049	0.99562
	Fracture of hand or wrist	IVW	2	-0.0138842	-0.410203	0.382435	0.202204	0.945257	0.99562
	Bursitis	IVW	2	-0.0378479	-1.11837	1.04267	0.551285	0.945265	0.99562
	Erythematous conditions	IVW	2	-0.0152107	-0.476349	0.445928	0.235275	0.948452	0.99562
	Lipoma of skin and subcutaneous tissue	IVW	2	-0.0109349	-0.345036	0.323166	0.17046	0.948851	0.99562
	Cellulitis and abscess of foot, toe	IVW	2	-0.00985008	-0.312799	0.293098	0.154566	0.949187	0.99562
	Effects of other external causes	IVW	2	0.0111816	-0.338799	0.361162	0.178562	0.950069	0.99562
	Iron deficiency anemias, unspecified or not due to blood loss	IVW	2	0.00802898	-0.261918	0.277976	0.137728	0.953513	0.995907
	Glaucoma	IVW	2	-0.0136924	-0.48404	0.456655	0.239973	0.954499	0.995907
	Acute and chronic tonsillitis	IVW	2	-0.0145526	-0.523954	0.494849	0.259899	0.955347	0.995907
	Degenerative disease of the spinal cord	IVW	2	0.0143203	-0.524239	0.552879	0.274775	0.958436	0.995907
	Noninflammatory female genital disorders	IVW	2	-0.00622878	-0.244417	0.23196	0.121525	0.959122	0.995907
	Endometriosis	IVW	2	0.00945241	-0.356408	0.375313	0.186664	0.959613	0.995907
	Digestive congenital anomalies	IVW	2	0.0241422	-0.969201	1.01749	0.506808	0.962007	0.995907
	Stiffness of joint	IVW	2	-0.0213924	-0.925854	0.883069	0.46146	0.963025	0.995907
	Poisoning by anticonvulsants and anti-Parkinsonism drugs	IVW	2	-0.0275632	-1.35671	1.30159	0.678137	0.967579	0.995907
	Dysuria	IVW	2	-0.0204891	-1.0207	0.979721	0.510311	0.967973	0.995907
	Perforation of tympanic membrane	IVW	2	-0.0135807	-0.717082	0.689921	0.358929	0.969818	0.995907
	Vitamin B-complex deficiencies	IVW	2	-0.0129393	-0.841176	0.815297	0.42257	0.975572	0.995907
	Candidiasis	IVW	2	-0.0150739	-1.01061	0.980464	0.507928	0.976324	0.995907
	Pathologic fracture	IVW	2	0.015153	-0.985885	1.01619	0.510734	0.976331	0.995907
	Disorders of fluid, electrolyte, and acid-base balance	IVW	2	0.00445951	-0.298351	0.30727	0.154495	0.976972	0.995907
	Other abnormality of urination	IVW	2	-0.00768796	-0.531703	0.516327	0.267355	0.977059	0.995907
	Celiac disease	IVW	2	-0.0184888	-1.43071	1.39373	0.720519	0.979528	0.995907
	Colon cancer	IVW	2	-0.00699372	-0.548781	0.534794	0.276422	0.979815	0.995907
	Anxiety disorder	IVW	2	0.00621465	-0.514311	0.52674	0.265574	0.981331	0.995907
	Rheumatism, unspecified and fibrositis	IVW	2	0.0165465	-1.3887	1.4218	0.716964	0.981588	0.995907
	Fracture of patella	IVW	2	0.0106891	-0.900563	0.921941	0.464924	0.981657	0.995907
	Reflux esophagitis	IVW	2	0.00692346	-0.605264	0.619111	0.31234	0.982315	0.995907
	Leukemia	IVW	2	-0.00622914	-0.565061	0.552603	0.285118	0.98257	0.995907
	Pneumococcal pneumonia	IVW	2	-0.00736882	-0.680164	0.665426	0.343263	0.982873	0.995907
	Liver abscess and sequelae of chronic liver disease	IVW	2	0.00783584	-0.777761	0.793433	0.400815	0.984403	0.995907
	Hypoglycemia	IVW	2	0.0110887	-1.15079	1.17297	0.592795	0.985076	0.995907
	Inflammatory disease of cervix, vagina, and vulva	IVW	2	0.00377846	-0.425601	0.433158	0.219071	0.986239	0.995907
	Poisoning by antibiotics	IVW	2	-0.00136851	-0.17604	0.173303	0.0891182	0.987748	0.995907
	Anal and rectal conditions	IVW	2	-0.00181303	-0.26046	0.256834	0.131963	0.989038	0.995907
	Acquired spondylolisthesis	IVW	2	-0.00721859	-1.1222	1.10776	0.568868	0.989876	0.995907
	Unspecified polyarthropathy or polyarthritis	IVW	2	-0.00227038	-0.384011	0.37947	0.194765	0.990699	0.995907
	Lymphoid leukemia	IVW	2	-0.00411292	-1.22379	1.21557	0.622285	0.994727	0.997951
	Mitral valve disease	IVW	2	-0.0018509	-0.83753	0.833828	0.426367	0.996536	0.997951
	Left bundle branch block	IVW	2	-0.00129862	-0.807386	0.804788	0.411269	0.997481	0.997951
	Contusion	IVW	2	0.00076889	-0.586105	0.587643	0.299425	0.997951	0.997951

## Sheet: ST7
Supplement Table 7. Mendelian randomization analysis results of SRA1 on 91 blood metabolites
Exposure	Outcome	Category name	method	nsnp	b	lo_ci	up_ci	se	pval	p_fdr
SRA1	Isoleucine	Amino acid	IVW	2	-0.0984301	-0.163207	-0.0336532	0.0330494	0.0028988	0.0409417
	Valine	Amino acid	IVW	2	-0.0974706	-0.161674	-0.0332671	0.0327569	0.0029244	0.0409417
	Creatinine	Amino acid	IVW	2	-0.0806421	-0.137546	-0.0237377	0.0290328	0.00547594	0.0511088
	Phenylalanine	Amino acid	IVW	2	-0.061359	-0.127382	0.00466435	0.0336854	0.068526	0.405231
	Sphingomyelins	Lipid	IVW	2	0.0591263	-0.00536928	0.123622	0.0329059	0.0723627	0.405231
	Total cholesterol	Lipid	IVW	2	0.0552076	-0.0095665	0.119982	0.033048	0.0948151	0.442471
	LDL cholesterol	Lipid	IVW	2	0.0520489	-0.0197515	0.123849	0.0366328	0.155367	0.51062
	Glycoprotein acetyls	Peptide	IVW	2	-0.0469489	-0.114031	0.0201335	0.0342257	0.170143	0.51062
	Acetone	Energy	IVW	2	-0.0458698	-0.111897	0.0201578	0.0336876	0.173316	0.51062
	Apolipoprotein B	Lipid	IVW	2	0.0448433	-0.0210676	0.110754	0.033628	0.182364	0.51062
	Glutamine	Amino acid	IVW	2	-0.0576627	-0.150433	0.0351077	0.0473318	0.223124	0.567951
	Total triglycerides	Lipid	IVW	2	-0.0375053	-0.101417	0.0264063	0.032608	0.250066	0.583487
	Glycoproteins	Peptide	IVW	2	-0.105735	-0.302818	0.091348	0.100552	0.293011	0.6311
	Acetate	Cofactors and vitamins	IVW	2	0.0315492	-0.0349093	0.0980077	0.0339074	0.352137	0.704274
	HDL cholesterol	Lipid	IVW	2	0.0252898	-0.0336924	0.0842721	0.030093	0.40069	0.740106
	Lactate	Carbohydrate	IVW	2	-0.0270202	-0.0931065	0.0390661	0.0337175	0.422917	0.740106
	Free cholesterol	Lipid	IVW	2	0.0505008	-0.158004	0.259005	0.10638	0.634985	0.966541
	3-Hydroxybutyrate	Lipid	IVW	2	-0.0219774	-0.115476	0.0715209	0.0477032	0.645006	0.966541
	Glucose	Carbohydrate	IVW	2	0.0126342	-0.0535532	0.0788215	0.0337691	0.708304	0.966541
	Phosphoglycerides	Lipid	IVW	2	0.0100977	-0.0524283	0.0726238	0.0319011	0.751598	0.966541
	VLDL cholesterol	Lipid	IVW	2	0.0103022	-0.0555965	0.0762009	0.0336218	0.759289	0.966541
	Phosphatidylcholines	Lipid	IVW	2	0.00966471	-0.0521922	0.0715216	0.0315596	0.759425	0.966541
	Histidine	Amino acid	IVW	2	0.0108915	-0.074302	0.0960849	0.0434661	0.802144	0.967487
	Linoleic acid	Lipid	IVW	2	0.00712321	-0.0576237	0.0718701	0.0330341	0.829275	0.967487
	Pyruvate	Carbohydrate	IVW	2	-0.00529405	-0.102176	0.0915879	0.0494296	0.914707	0.979418
	Albumin	Peptide	IVW	2	0.00978681	-0.203384	0.222958	0.108761	0.928299	0.979418
	Apolipoprotein A1	Lipid	IVW	2	0.000897746	-0.0595331	0.0613286	0.0308321	0.976771	0.979418
	Docosahexaenoic acid	Lipid	IVW	2	0.00146494	-0.10983	0.11276	0.0567832	0.979418	0.979418

## Sheet: ST8
Supplement Table 8. Mendelian randomization analysis results of 91 blood metabolites on PPD.
Exposure	Category name	Outcome	method	nsnp	b	lo_ci	up_ci	se	pval	p_fdr
Isoleucine	Amino acid	PPD	IVW	9	-0.302232	-0.515574	-0.0888905	0.108848	0.00549224	0.323122
Sphingomyelins	Lipid		IVW	65	-0.110141	-0.191344	-0.0289373	0.0414304	0.00785	0.323122
Free cholesterol	Lipid		IVW	15	-0.0857201	-0.154791	-0.0166496	0.0352401	0.0149966	0.323122
Succinylcarnitine	Energy		IVW	7	-0.6592	-1.19241	-0.125996	0.272043	0.0153868	0.323122
Glutaroyl carnitine	Amino acid		IVW	8	0.488049	0.0635968	0.912501	0.216557	0.0242168	0.354713
Phenylalanine	Amino acid		IVW	9	0.220516	0.0272393	0.413793	0.0986105	0.0253366	0.354713
VLDL cholesterol	Lipid		IVW	62	-0.0917267	-0.178495	-0.00495882	0.0442693	0.0382641	0.459169
Dihomo-linolenate (20:3n3 or n6)	Lipid		IVW	2	-0.81107	-1.66955	0.0474129	0.438002	0.0640615	0.654617
Apolipoprotein B	Lipid		IVW	56	-0.0672329	-0.142127	0.00766172	0.0382115	0.078494	0.654617
Total cholesterol	Lipid		IVW	63	-0.076018	-0.163813	0.0117766	0.0447931	0.0896796	0.654617
Gamma-glutamylglutamine	Peptide		IVW	3	0.886164	-0.13809	1.91042	0.522579	0.0899328	0.654617
Glycoproteins	Peptide		IVW	11	-0.0434965	-0.0943292	0.0073362	0.025935	0.0935167	0.654617
N-acetylglycine	Amino acid		IVW	2	-0.229792	-0.524414	0.0648291	0.150317	0.126334	0.774646
3-methyl-2-oxovalerate	Amino acid		IVW	3	-0.943409	-2.1874	0.300578	0.634687	0.137169	0.774646
LDL cholesterol	Lipid		IVW	50	-0.0657082	-0.152607	0.021191	0.0443363	0.13833	0.774646
Docosahexaenoic acid	Lipid		IVW	47	-0.0516695	-0.121857	0.0185177	0.0358098	0.149052	0.782524
Linoleic acid	Lipid		IVW	51	-0.0632142	-0.151933	0.025505	0.0452649	0.162552	0.803199
Phosphoglycerides	Lipid		IVW	55	-0.0556582	-0.139335	0.0280191	0.0426925	0.192336	0.859646
2-hydroxyisobutyrate	Amino acid		IVW	3	0.545506	-0.278976	1.36999	0.420654	0.194699	0.859646
Phosphatidylcholines	Lipid		IVW	57	-0.0553366	-0.142966	0.0322924	0.0447087	0.215822	0.859646
Gamma-glutamyltyrosine	Peptide		IVW	5	-0.73189	-1.91393	0.450147	0.60308	0.224905	0.859646
Tryptophan	Amino acid		IVW	18	0.741985	-0.472258	1.95623	0.619512	0.231037	0.859646
N-acetylcarnosine	Peptide		IVW	3	-0.520885	-1.42929	0.387516	0.46347	0.261063	0.859646
Alpha-hydroxyisovalerate	Amino acid		IVW	3	0.36312	-0.282677	1.00892	0.329489	0.27043	0.859646
Cis-4-decenoyl carnitine	Lipid		IVW	2	0.246189	-0.228534	0.720911	0.242205	0.309417	0.859646
Apolipoprotein A1	Lipid		IVW	73	-0.0376208	-0.110289	0.0350469	0.0370754	0.310243	0.859646
Glucose	Carbohydrate		IVW	25	-0.0946456	-0.277535	0.0882438	0.093311	0.310438	0.859646
Uridine	Nucleotide		IVW	3	0.694857	-0.746101	2.13581	0.735182	0.344583	0.859646
4-androsten-3beta,17beta-diol disulfate 1	Lipid		IVW	2	-0.0890386	-0.279321	0.101244	0.0970828	0.359069	0.859646
Lactate	Carbohydrate		IVW	12	-0.200178	-0.628317	0.22796	0.218438	0.359453	0.859646
Carnitine	Lipid		IVW	17	0.393618	-0.450048	1.23728	0.430442	0.36048	0.859646
5-alpha-pregnan-3beta,20alpha-disulfate	Lipid		IVW	4	-0.132465	-0.417159	0.152229	0.145252	0.361786	0.859646
nonanoylcarnitine	Lipid		IVW	2	0.157304	-0.181839	0.496448	0.173032	0.363296	0.859646
Total triglycerides	Lipid		IVW	64	-0.03624	-0.114588	0.042108	0.0399735	0.364617	0.859646
Asparagine	Amino acid		IVW	2	-0.711128	-2.35513	0.932876	0.838778	0.396541	0.859646
1-arachidonoylglycerophosphocholine	Lipid		IVW	3	0.188675	-0.254161	0.631512	0.225937	0.403674	0.859646
1,5-anhydroglucitol (1,5-AG)	Carbohydrate		IVW	3	0.541564	-0.766806	1.84993	0.667536	0.4172	0.859646
Isobutyrylcarnitine	Amino acid		IVW	3	-0.151916	-0.52227	0.218438	0.188956	0.421411	0.859646
Serine	Amino acid		IVW	3	-0.415951	-1.43411	0.602206	0.519468	0.42329	0.859646
Histidine	Amino acid		IVW	15	0.0854064	-0.130907	0.30172	0.110364	0.439013	0.859646
Isovalerylcarnitine	Amino acid		IVW	3	-0.190759	-0.678746	0.297227	0.248973	0.443565	0.859646
Androsterone sulfate	Lipid		IVW	3	0.126941	-0.197854	0.451735	0.165712	0.443656	0.859646
Hexanoylcarnitine	Lipid		IVW	4	0.133068	-0.208406	0.474543	0.174222	0.444994	0.859646
Tyrosine	Amino acid		IVW	3	-0.712373	-2.56188	1.13714	0.943627	0.450291	0.859646
O-methylascorbate	Cofactors and vitamins		IVW	6	-0.2234	-0.853398	0.406598	0.321428	0.48704	0.906157
HWESASXX	Peptide		IVW	2	0.505409	-0.978184	1.989	0.756935	0.504322	0.906157
2-aminooctanoic acid	Amino acid		IVW	3	0.0816971	-0.159642	0.323036	0.123132	0.507016	0.906157
Decanoylcarnitine	Lipid		IVW	3	0.148544	-0.309094	0.606183	0.233489	0.52465	0.910094
Betaine	Amino acid		IVW	3	0.25483	-0.600534	1.11019	0.43641	0.559272	0.910094
10-undecenoate (11:1n1)	Lipid		IVW	2	0.151058	-0.358745	0.660862	0.260104	0.561401	0.910094
Valine	Amino acid		IVW	20	-0.0524737	-0.233427	0.128479	0.092323	0.569783	0.910094
Epiandrosterone sulfate	Lipid		IVW	2	0.133739	-0.350008	0.617486	0.24681	0.587907	0.910094
Octanoylcarnitine	Lipid		IVW	3	0.116385	-0.305154	0.537924	0.215071	0.588405	0.910094
Citrate	Energy		IVW	6	0.306107	-0.807438	1.41965	0.568136	0.59003	0.910094
Glutamine	Amino acid		IVW	41	0.0251123	-0.0695926	0.119817	0.0483188	0.603258	0.910094
3-Hydroxybutyrate	Lipid		IVW	17	0.0508796	-0.147294	0.249054	0.101109	0.614813	0.910094
oxidized bilirubin	Cofactors and vitamins		IVW	2	0.0804535	-0.241619	0.402526	0.164323	0.624412	0.910094
Kynurenine	Amino acid		IVW	4	-0.192813	-0.973657	0.58803	0.398389	0.628399	0.910094
Glycoprotein acetyls	Peptide		IVW	56	-0.024425	-0.127976	0.0791256	0.0528319	0.643855	0.916676
1-arachidonoylglycerophosphoinositol	Lipid		IVW	4	-0.126642	-0.711084	0.457801	0.298185	0.671049	0.930025
HDL cholesterol	Lipid		IVW	90	-0.01447	-0.0821927	0.0532528	0.0345524	0.675375	0.930025
5alpha-androstan-3beta,17beta-diol disulfate	Lipid		IVW	3	0.0629786	-0.245614	0.371571	0.157445	0.689155	0.933693
Albumin	Peptide		IVW	3	0.0635872	-0.286508	0.413683	0.17862	0.721847	0.940441
Erythronate	Carbohydrate		IVW	3	0.287428	-1.29563	1.87048	0.807682	0.721939	0.940441
Pyruvate	Carbohydrate		IVW	22	0.0249798	-0.115648	0.165607	0.0717487	0.727723	0.940441
Acetone	Energy		IVW	11	0.0547146	-0.276058	0.385487	0.168761	0.745777	0.949171
3-dehydrocarnitine	Lipid		IVW	3	-0.12882	-0.954644	0.697005	0.421339	0.759803	0.952589
Hexadecanedioate	Lipid		IVW	3	0.0454227	-0.268069	0.358915	0.159945	0.776418	0.959105
Acetate	Cofactors and vitamins		IVW	7	0.0393936	-0.303799	0.382586	0.175098	0.821995	0.983131
Butyrylcarnitine	Lipid		IVW	5	-0.0198551	-0.198593	0.158883	0.0911929	0.827642	0.983131
Leucine	Amino acid		IVW	12	-0.218491	-2.34157	1.90459	1.0832	0.840145	0.983131
Tetradecanedioate	Lipid		IVW	3	0.0228343	-0.239851	0.285519	0.134023	0.864714	0.983131
alpha-glutamyltyrosine	Peptide		IVW	2	-0.0390026	-0.500563	0.422558	0.23549	0.868453	0.983131
Propionylcarnitine	Lipid		IVW	4	-0.0728461	-1.02361	0.877922	0.485086	0.880629	0.983131
1-arachidonoylglycerophosphoethanolamine	Lipid		IVW	3	0.0446199	-0.565586	0.654826	0.311329	0.886037	0.983131
Creatinine	Amino acid		IVW	66	0.00899322	-0.120243	0.138229	0.0659368	0.891512	0.983131
N-acetylornithine	Amino acid		IVW	2	0.0109927	-0.174287	0.196273	0.0945306	0.907425	0.983131
Citrulline	Amino acid		IVW	4	-0.0580559	-1.43959	1.32348	0.704866	0.934357	0.983131
Octadecanedioate	Lipid		IVW	2	-0.0217824	-0.655484	0.611919	0.323317	0.946286	0.983131
4-acetamidobutanoate	Amino acid		IVW	2	0.022782	-0.894285	0.939849	0.467891	0.961166	0.983131
Proline	Amino acid		IVW	3	-0.026888	-1.45272	1.39895	0.727467	0.970516	0.983131
N-[3-(2-Oxopyrrolidin-1-yl)propyl]acetamide	Amino acid		IVW	4	0.0111277	-0.581062	0.603318	0.302138	0.970621	0.983131
Bradykinin, des-arg(9)	Peptide		IVW	3	-0.00183573	-0.120401	0.116729	0.0604922	0.975791	0.983131
Pyroglutamine	Amino acid		IVW	4	-0.00426211	-0.399346	0.390822	0.201574	0.983131	0.983131

## Sheet: ST9
Supplement Table 9. Sensitivity MR analysis of the effect of significant blood metabolites on PPD.
Exposure	Outcome	method	nsnp	or	or_lci95	or_uci95	pval	Pleiotropy test	Heterogeneity test
Isoleucine	PPD	IVW	9	0.739166	0.597158	0.914946	0.00549224	0.0803571	0.909597
		MR Egger	9	1.39275	0.731358	2.65228	0.347003
		Weighted median	9	0.745464	0.560671	0.991165	0.043274
		Weighted mode	9	0.840869	0.57859	1.22204	0.390067
Sphingomyelins	PPD	IVW	65	0.895708	0.825848	0.971477	0.00785	0.391924	0.176429
		MR Egger	65	0.940487	0.819618	1.07918	0.385307
		Weighted median	65	0.957089	0.853936	1.0727	0.450963
		Weighted mode	65	0.922701	0.817541	1.04139	0.197204
Free cholesterol	PPD	IVW	15	0.917851	0.856594	0.983488	0.0149966	0.657185	0.987288
		MR Egger	15	0.890633	0.768781	1.0318	0.146822
		Weighted median	15	0.917111	0.838517	1.00307	0.0583703
		Weighted mode	15	0.931763	0.84152	1.03168	0.195374
Succinylcarnitine	PPD	IVW	7	0.517265	0.30349	0.881619	0.0153868	0.749311	0.953884
		MR Egger	7	0.435826	0.141032	1.34682	0.208675
		Weighted median	7	0.490469	0.260285	0.924218	0.0275391
		Weighted mode	7	0.486148	0.247043	0.956676	0.0817976
Glutaroyl carnitine	PPD	IVW	8	1.62913	1.06566	2.49054	0.0242168	0.517795	0.403153
		MR Egger	8	2.99154	0.501059	17.8608	0.27465
		Weighted median	8	1.55893	0.88835	2.73572	0.121767
		Weighted mode	8	1.52607	0.655323	3.55382	0.359697
Phenylalanine	PPD	IVW	9	1.24672	1.02761	1.51254	0.0253366	0.766107	0.36237
		MR Egger	9	1.30913	0.904429	1.89492	0.196457
		Weighted median	9	1.22092	0.978583	1.52326	0.0770253
		Weighted mode	9	1.24163	0.982894	1.56847	0.107022
VLDL cholesterol	PPD	IVW	62	0.912354	0.836529	0.995053	0.0382641	0.14833	0.0690678
		MR Egger	62	1.00688	0.860165	1.17862	0.932288
		Weighted median	62	0.929272	0.82463	1.04719	0.228793
		Weighted mode	62	0.914415	0.790213	1.05814	0.234297

[truncated: 5 more sheets: ST10, ST11, ST12, ST13, ST14]
